1 **Design Principle of Lysis/Lysogeny Decision vis-a-vis**

2 **Multiplicity of Infection**

3 Dinkar Wadhwa\*

4 Department of Chemical Engineering

5 Indian Institute of Technology Bombay, Mumbai - 400 076, India

6 `dinkar.wadhwa84@gmail.com`

7 \*The author is not currently affiliated with the institution.

8

## 9 Abstract

10 Bacteriophage lambda possesses dual strategy of replication. Upon infecting its host, *Escherichia*  
11 *coli*, it can either choose lytic pathway, in which the host undergoes lysis, releasing hundreds  
12 of progeny viruses, or opt for lysogeny, in which the viral genome exists as part of bacterial  
13 chromosome known as prophage. Classic and molecular studies have shown that the lysis/lysogeny  
14 decision depends upon the number of coinfecting phages, viz. the multiplicity of infection  
15 (MoI): lysis at low MoI; lysogeny at high MoI. Here, by constructing an expression for quality  
16 of the lysis/lysogeny minimalist two-protein switch which, beside another thing, demands  
17 high equilibrium concentration of Cro-like protein (Lyt) and low equilibrium concentration  
18 of CI-like protein (Lys) - that is, lytic development - at MoI of 1, and vice versa - that is,  
19 lysogeny development - at MoI of 2, I demonstrate that positive feedback loop formed by  
20 activation of *cI*'s transcription by its own product in a cooperative manner underlies the switch's  
21 design. The minimalist two-protein model, in which Lys performs exactly the same function  
22 as CI does in lambda phage's genetic regulatory network (GRN), is justified by showing its  
23 analogy with the GRN responsible for lysis/lysogeny decision. Existence of another stable  
24 state at MoI of 1 is argued to be responsible for lysogen stability. Further, by comparing the  
25 minimalist model and its variants, possessing the positive feedback loop, with other models,  
26 without having the positive feedback loop, such as the mutual repression model, it is shown why  
27 lysis/lysogeny switch involving positive autoregulation of *cI* is evolved instead of one without  
28 it. A three-protein model, which is very close to the real GRN, is shown to be equivalent to  
29 a close variant of the two-protein minimalist switch. Finally, only a fraction of parameter sets  
30 that produced switch deterministically were able to do so, if at all, under stochastic simulations  
31 more than 95% of the time. Additionally, another stable state at MoI of 1 was not found during  
32 stochastic simulation.

33

34 **Keywords:** Bacteriophage  $\lambda$ , switch, positive feedback, bistability

## 35 Introduction

36 Virulent bacteriophages possess only one method of replication; that is, lytic strategy. However,  
37 other bacteriophages have a dual perpetuation strategy, viz. lytic and lysogeny. In lytic strategy,  
38 phage injects its genetic material into the host bacterium, viral genes are transcribed, m-RNAs,  
39 thus produced, are translated, and phage's genetic material is replicated. Finally, the host  
40 bacterium undergoes lysis, releasing progeny particles. In lysogeny, lytic pathway is repressed,  
41 the viral genome is integrated into that of the host bacterium, and thus, it exists in a latent  
42 form known as prophage. As the teleological explanation goes, lytic strategy leads to fast  
43 multiplication, but it's risky, as viral progenies have to find new hosts which don't already  
44 contain lysogenized phages. On the other hand, a lysogenized phage replicates along with its  
45 host, and therefore, reproduces by a slower process as compared to lytic strategy, but this way  
46 phage safeguards its survival. Should a phage infect a bacterium containing lysogenized phage,  
47 lambda repressors (CI) present in the cytosol will not allow expression from  $pR$ . Thus, the  
48 newly entered phage would remain inert and, ultimately, get digested by the host's nucleases.

49 Classic [1] and molecular studies [2] have shown that the lysis/lysogeny decision depends  
50 upon MoI. Avlund et al. analysed [3] Kourilsky's data [1,4] and determined the probability of  
51 lysogeny at MoI of 1 to be almost zero, at MoI of 2 to be around 0.6960, and at all higher  
52 MoIs to be around 0.9886. This ability of phage to choose between lysis and lysogeny based  
53 upon multiplicity of infection is but a form of quorum sensing occurring inside a bacterium. As  
54 described in sections below, a minimalist two-protein model, which was analogous to lambda's  
55 GRN, and many other models were constructed. The models were evaluated on the quality  
56 of switch they generated, by solving their defining equations using parameters, which were  
57 searched in two steps (see Methods for detail), and few sets of Hill coefficients. It is shown  
58 that positive feedback loop formed by CI activating transcription of its own gene is the essence  
59 of lysis/lysogeny switch's model. Lastly, a three-protein model is constructed which is very  
60 close to the real GRN in that the roles of Lyt and Lys in the former are identical to the roles of  
61 Cro and CI in the latter, respectively, and the function of CII-like protein in the former is fairly

62 similar to that of CII in the latter.

## 63 **Result and discussion**

### 64 **Minimalist two-protein lysis/lysogeny switch**

65 The promoter of *lyt* gene is constitutive; whereas, that of *lys* gene is positively regulated as  
66 they are in lambda phage's GRN. The role of Lys in the minimalist two-protein model; that  
67 is, binding cooperatively to the intergenic region, activating transcription of its own gene, and  
68 inhibiting transcription of *lyt* gene, is identical to that of CI in lambda phage's GRN. The role  
69 of Lyt was conceptualized from first principle in the following way. At MoI of 2, equilibrium  
70 concentrations of Lyt and Lys should be much lower and higher, respectively, as compared to  
71 those at MoI of 1. However, if Lyt did not bind to *lys* promoter, assuming no basal expression  
72 of *lys* (which is weak promoter anyway), equilibrium concentration of Lyt at MoI 2 would be  
73 even higher, let alone much lower, than that at MoI of 1. And equilibrium concentration of Lys  
74 would be very low, instead of being high enough to repress *lyt*, at MoI of 2. Since the only  
75 protein present to actuate any process is Lyt, it was argued that Lyt should engender lysogeny  
76 and inhibit lytic pathway at MoI of 2.

77 Thus, Lyt activates transcription of *lys* (whose product causes lysogeny development),  
78 represses transcription of its own gene, thereby suppressing lytic development (though, as  
79 shown below, the last interaction is dispensable), and activates imaginary downstream pathway  
80 which leads to lytic development. This seemingly paradoxical role of Lyt, as explained below,  
81 is due to it being proxy for CII, which causes lysogeny, and anti-termination factor Q, which  
82 enables transcription of lytic genes. The positive feedback loop constituted by transcriptional  
83 activation of *lys* by its own protein causes Lys to accumulate to low concentration at MoI of 1  
84 and high concentration at MoI of 2. Thus, at MoI of 1 Lyt's equilibrium concentration is high  
85 because it is constitutively produced and Lys' equilibrium concentration is not high enough to  
86 repress its production. On the other hand, at MoI of 2 Lyt's equilibrium concentration is low  
87 because of repression by Lys, which is present in high concentration.

88 GRN underlying lysis/lysogeny decision is much more complex than the minimalist two-protein  
89 model proposed here, because MoI is but one of many signals taken into account by the  
90 phage to decide between lysis and lysogeny. Since the expression for quality of lysis/lysogeny  
91 switch (the switching quotient) takes equilibrium values into account, the values of degradation  
92 constants of  $X$  (concentration of Lyt) and  $Y$  (concentration of Lys), viz.  $k_2$  and  $k_5$ , respectively,  
93 can be subsumed into  $k_1$ ,  $k_3$  and  $k_5$ . Hence, they are taken to be unity for all two-protein models.  
94 This model would henceforth be referred to as 1A\_Lyt\_Lys.

95

96 **1A\_Cro\_CI:**

$$\frac{dX}{dt} = \frac{mk_1}{1 + \frac{X^a}{K_{D1}} + \frac{Y^b}{K_{D2}}} - k_2X \quad (1)$$

$$\frac{dY}{dt} = \frac{m(k_3 \frac{X^a}{K_{D1}} + k_4 \frac{Y^b}{K_{D2}})}{1 + \frac{X^a}{K_{D1}} + \frac{Y^b}{K_{D2}}} - k_5Y \quad (2)$$

97 **Analogy between the minimalist two-protein model (1A\_Lyt\_Lys) and lambda**  
98 **phages GRN**

99 Upon infection, RNA polymerase transcribes from the constitutive promoters,  $pL$  and  $pR$ , till it  
100 encounters transcription terminators  $tL1$  and  $tR1$ , respectively.  $N$  and  $cro$  genes are transcribed  
101 by  $pL$  and  $pR$ , respectively. The product of  $N$  is an anti-termination factor that modifies  
102 subsequent RNAPs initiating at  $pL$  and  $pR$  so that they move past their respective terminators  
103 and transcribe  $cIII$  and  $cII$  genes, respectively. Such an RNAP from  $pR$  is also able to transcribe  
104 through another terminator,  $tR2$ , present upstream of gene  $Q$  (see Figure 2). Up to this point,  
105 the pathway for lytic and lysogeny are identical. Lytic pathway is chosen when the extended  
106 transcription from  $pR$  also causes gene  $Q$  to be transcribed.  $Q$ , being an anti-termination factor,  
107 causes transcription of  $pR'$  to not terminate, as it would otherwise do, at  $tR'$ , which is present

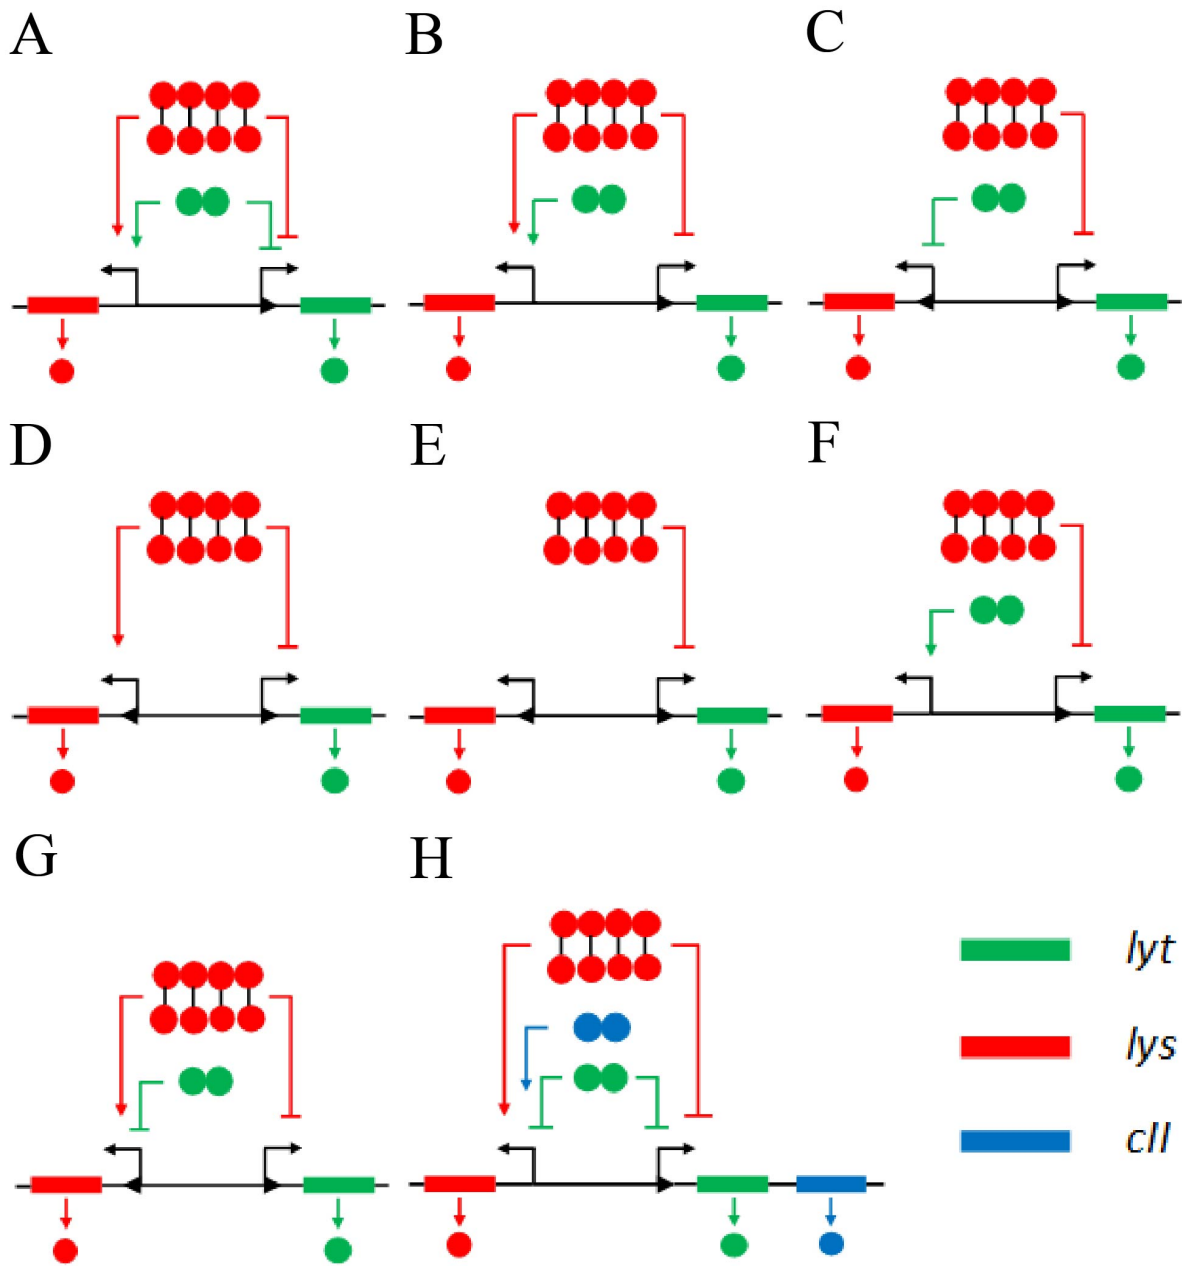

**Figure 1:** Various two-protein models, and three-protein model. (A) The minimalist model or 1A\_Lyt\_Lys. (B) Previous model with self-repression of *lyt* removed or 1B\_Lyt\_Lys. (C) Mutual repression or 2\_Lyt\_Lys. (D) 3\_Lyt\_Lys. (E) 4\_Lyt\_Lys. (F) 5\_Lyt\_Lys. (G) 6\_Lyt\_Lys. (H) Three-protein model which is very close to lambda's GRN or Lyt\_Lys\_CII. Lower arrowhead represents basal expression.

108 at about 200 bases away from the beginning, thereby allowing transcription of the lytic genes  
109 downstream of *Q*. Once this happens, the cell is committed to lysis. CIII protein has an indirect  
110 role in establishing lysogeny. It prevents the degradation of CII by inhibiting bacterial protease  
111 HflB [5,6]. As the current paper focuses on the design principle of lysis/lysogeny switch, the  
112 (indirect) role of cIII will not be taken into consideration.

113 In the lambda's GRN, *cII* and *Q* are under the control of promoter *pR*. Since in 1A\_Lyt\_Lys  
114 *lyt* is transcribed from *pR*, Lyt protein should be functionally equivalent to CII and Q. That  
115 is, on the whole, CII and Q should carry out three actions: activate transcription from *lys*,  
116 inhibit transcription from *lyt* gene, and engender lytic development. When CII accumulates  
117 in sufficient concentration, it activates transcription from three promoters: *pI*, *pRE*, and *pAQ*  
118 [10,11]. Promoter *pI* transcribes *int* gene, required for the integration of phage genome into  
119 that of the host bacterium. Transcript produced from *pRE* contains orf for *cI*; hence, activation  
120 of this promoter leads to production of CI. Thus, the action of CII on promoters *pI* and *pRE*  
121 is functionally equivalent to Lyt protein activating transcription of *lys*. Notably, while the role  
122 of Cro in lambda's GRN is to inhibit the expression of *lys*, Cro-like protein (Lyt) activates the  
123 expression of *lys* in the 1A\_Lyt\_Lys.

124 CII inhibits lytic development by activating transcription from *pAQ*, which is located  
125 within *Q* gene in the opposite polarity. The transcript, thus produced, being antisense to (a part  
126 of) *Q* mRNA hybridizes with the latter, thereby preventing the translation of *Q* m-RNA, which  
127 is essential for lytic development [2]. Thus, the action of CII on promoter *pAQ* is functionally  
128 equivalent to Lyt protein inhibiting transcription of its own gene. If CII is not produced in  
129 sufficient amount, *Q* m-RNA is translated and anti-terminator Q, thus produced, causes lysis.

### 130 **Variants of 1A\_Lyt\_Lys and mutual repression model**

131 In order to better demonstrate that the positive feedback underlies lysis/lysogeny switch, I  
132 considered variants of 1A\_Lyt\_Lys, mutual repression model, which doesn't have positive feedback  
133 loop, and its variants, and a model having the features of 1A\_Lyt\_Lys and mutual repression  
134 model. Since two features, viz. constitutive expression of *lyt* and its inhibition by Lys, are

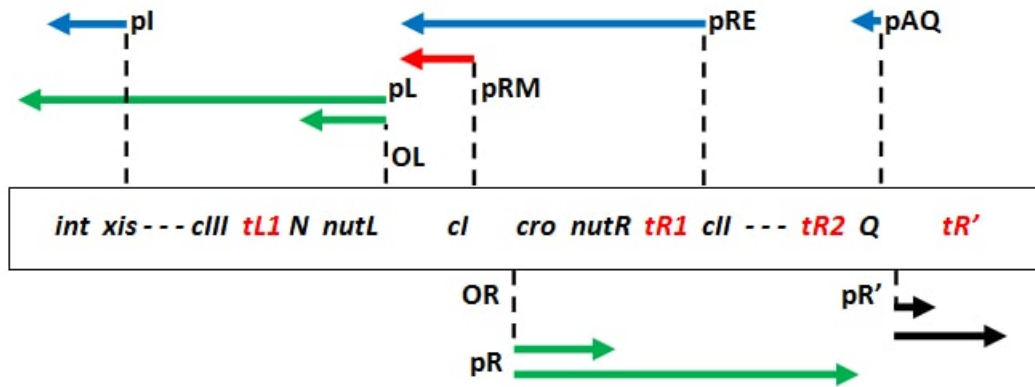

**Figure 2:** GRN and transcription map of lambda (adapted from Figure 1 of [8]). Transcripts that are produced earliest, viz. from *pL* and *pR* promoters, are depicted as green arrows. The late transcript, viz. from *pR'*, is a black arrow. Transcripts from CII-activated promoters, viz. *pI*, *pRE*, and *pAQ*, are shown as blue arrows. Transcript from *pRM*, which is activated by CI, is shown as red arrow. Transcription terminators, namely *tL1*, *tR1*, and *tR2*, are depicted in red.

135 common, they would not be mentioned in the description of the models below. Since *cI* gene is  
 136 positively regulated in the lambda's GRN, *lys* has to have either basal expression or be activated  
 137 by Lyt. All of these models can be categorized in terms of three factors, as shown in the Table  
 138 1. First column shows whether *lys* possesses basal expression or is activated by Lyt. Second  
 139 column shows if positive feedback, constituted by transcriptional activation of *lys* by its own  
 140 product, is present. Third column shows if inhibition of *lys* by Lyt is present. Inhibition of  
 141 *lys* by Lyt can only be present when *lys* possesses basal expression. Thus, for *lys* having basal  
 142 expression, there are four models; and where it gets activated by Lyt, there are two models.  
 143

**Table 1:** Classification of additional two-protein models.

| model      | Basal expression of <i>lys</i> /<br>Activation of <i>lys</i> by Lyt | Activation of <i>lys</i><br>by Lys | Inhibition of <i>lys</i><br>by Lyt |
|------------|---------------------------------------------------------------------|------------------------------------|------------------------------------|
| 1B_Lyt_Lys | Activation                                                          | Yes                                | N/A                                |
| 5_Lyt_Lys  | Activation                                                          | No                                 | N/A                                |
| 3_Lyt_Lys  | Basal                                                               | Yes                                | No                                 |
| 6_Lyt_Lys  | Basal                                                               | Yes                                | Yes                                |
| 4_Lyt_Lys  | Basal                                                               | No                                 | No                                 |
| 2_Lyt_Lys  | Basal                                                               | No                                 | Yes                                |



144 **1B\_Lyt\_Lys**: This model differs from 1A\_Lyt\_Lys only in not having self-inhibition of Lyt. The  
 145 inhibition of *lyt*, required at MoI of 2, by its own product is dispensable, as Lys performs the  
 146 same function, and more so, because at MoI of 2 Lyt's concentration is required to be much  
 147 lower than that of Lys in order to make good quality switch. In terms of lambda's GRN, this  
 148 would mean CI, instead of CII, activating transcription from *pAQ*.

$$\frac{dX}{dt} = \frac{mk_1(1 + \frac{X^a}{KD_1})}{1 + \frac{X^a}{KD_1} + \frac{Y^b}{KD_2}} - k_2X \quad (3)$$

$$\frac{dY}{dt} = \frac{m(k_3 \frac{X^a}{KD_1} + k_4 \frac{Y^b}{KD_2})}{1 + \frac{X^a}{KD_1} + \frac{Y^b}{KD_2}} - k_5Y \quad (4)$$

149 **2\_Lyt\_Lys** (Mutual repression): Lyt represses *lys*, which has basal expression.

$$\frac{dX}{dt} = \frac{mk_1(1 + \frac{X^a}{KD_1})}{1 + \frac{X^a}{KD_1} + \frac{Y^b}{KD_2}} - k_2X \quad (5)$$

$$\frac{dY}{dt} = \frac{mk_3(1 + \frac{Y^b}{KD_2})}{1 + \frac{X^a}{KD_1} + \frac{Y^b}{KD_2}} - k_5Y \quad (6)$$

150 **3\_Lyt\_Lys**: *lys* has basal expression and is activated by Lys cooperatively.

$$\frac{dX}{dt} = \frac{mk_1}{1 + \frac{Y^b}{KD_2}} - k_2X \quad (7)$$

$$\frac{dY}{dt} = \frac{m(k_3 + k_4 \frac{Y^b}{KD_2})}{1 + \frac{Y^b}{KD_2}} - k_5Y \quad (8)$$

151 **4\_Lyt\_Lys:** *lys* has basal expression.

$$\frac{dX}{dt} = \frac{mk_1}{1 + \frac{Y^b}{K_{D2}}} - k_2X \quad (9)$$

$$\frac{dY}{dt} = mk_3 - k_5Y \quad (10)$$

152 **5\_Lyt\_Lys:** *lys* is activated by Lyt.

$$\frac{dX}{dt} = \frac{mk_1(1 + \frac{X^a}{K_{D1}})}{1 + \frac{X^a}{K_{D1}} + \frac{Y^b}{K_{D2}}} - k_2X \quad (11)$$

$$\frac{dY}{dt} = \frac{mk_3 \frac{X^a}{K_{D1}}}{1 + \frac{X^a}{K_{D1}} + \frac{Y^b}{K_{D2}}} - k_5Y \quad (12)$$

153 **6\_Lyt\_Lys:** *lys* has basal expression, is activated by Lys, and inhibited by Lyt.

$$\frac{dX}{dt} = \frac{mk_1(1 + \frac{X^a}{K_{D1}})}{1 + \frac{X^a}{K_{D1}} + \frac{Y^b}{K_{D2}}} - k_2X \quad (13)$$

$$\frac{dY}{dt} = \frac{m(k_3 + k_4 \frac{Y^b}{K_{D2}})}{1 + \frac{X^a}{K_{D1}} + \frac{Y^b}{K_{D2}}} - k_5Y \quad (14)$$

#### 154 **Deterministic simulation**

155 Since Cro forms dimer, Hill coefficient for Lyt's binding (referred to as a) is considered to be 2;  
156 whereas, since CI forms tetramer, Hill coefficient for Lys' binding (referred to as b) was taken  
157 to be 4. However, in the interest of completeness, another set of Hill coefficients, viz. a=2,

158  $b=2$ , was also considered. The rate constants and dissociation constants of equations defining  
159 a given model were searched (see Methods for details) in two stages: order search and linear  
160 search (as they are called here). For a given model and set of Hill coefficients ( $a$  and  $b$ ), a set  
161 of rate constants and dissociation constants would henceforth be referred to as a parameter set  
162 (That is, Hill coefficients are not a part of parameter set). Parameter sets were selected on the  
163 basis of quality of switch, viz. switch quotient (as it is called here), they generated. Switch  
164 quotient was initially considered to be determined by the expression

$$SQ = \frac{(S_1 - S_2)}{S_1}$$

165  $S_1 = \min\{\text{Lyt at MoI of 1, Lys at MoI of 2}\}$

166  $S_2 = \max\{\text{Lys at MoI of 1, Lyt at MoI of 2}\}$

167 The expression, however, selected parameter sets which gave unequal equilibrium values of Lyt  
168 at MoI of 1 and Lys at MoI of 2. From the perspective of simplicity, I believe that the difference  
169 between the two should be minimal; therefore, the previous expression is multiplied by ratio of  
170  $S_1$  to  $S_3$  in order to penalize the difference between  $S_3$  and  $S_1$ .

$$SQ = \frac{(S_1 - S_2)}{S_1} \cdot \frac{S_1}{S_3} = \frac{(S_1 - S_2)}{S_3}$$

171  $S_3 = \max\{\text{Lyt at MoI of 1, Lys at MoI of 2}\}$

172 This expression (like the older one) varies between 0 and 1. Only those parameter sets were  
173 selected whose corresponding switch quotients (SQ) were positive.

174 As Table 2 shows, all of the models possessing the positive feedback loop have average  
175 SQ of more than 0.97 for both sets of Hill coefficients (lowest SQ among all the models in  
176 this category was 0.9270). Mutual repression model for Hill coefficients' set of  $a=2$ ,  $b=2$  have  
177 average SQ of 0.5283 (highest SQ was 0.6666); and, for that of  $a=2$ ,  $b=4$  all SQs were more  
178 than 0.9 except for one parameter set, whose SQ was 0.5. 4.Lyt.Lys for Hill coefficients' set of  
179  $a=2$ ,  $b=2$  gives SQs of around 0.47 and 0.48; and, for that of  $a=2$ ,  $b=4$  both SQs were almost  
180 0.5. Thus, if we exclude 2.Lyt.Lys for Hill coefficients' set of  $a=2$ ,  $b=4$  from the analysis, the

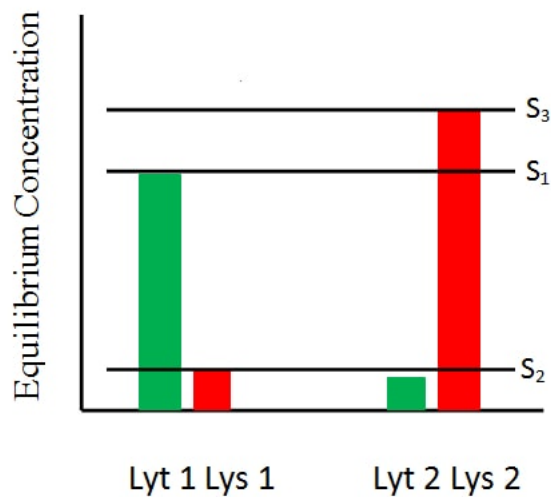

**Figure 3:** Schematic of switch's profile, viz. equilibrium concentrations of Lyt and Lys at the two MoIs.

181 lowest SQ among models with the positive feedback loop, viz. 1A\_Lyt\_Lys, 1A\_Lyt(1)\_Lys,  
182 1B\_Lyt\_Lys, 3\_Lyt\_Lys, and 6\_Lyt\_Lys, was much higher than the highest SQ among models  
183 without it, viz. 2\_Lyt\_Lys and 4\_Lyt\_Lys.

184 In the former set, Lys activating its own gene lets the value of Lys at MoI of 1 to be  
185 disproportionately lower for its desired particular value at MoI of 2. On the other hand,  
186 in 4\_Lyt\_Lys, since increase in genome copy number leads to proportional increase in the  
187 equilibrium activity of *lys*' promoter, value of Lys at MoI of 1 would be half its value at MoI of  
188 2. However, mutual repression model does generate many parameter sets with SQ greater than  
189 0.9 for Hill coefficients' set of  $a=2$ ,  $b=4$ . Since this model exhibits very different behaviour in  
190 the stochastic simulations, it will be discussed further in the section for stochastic simulations.

191 The model 5\_Lyt\_Lys did not generate any parameter set. The reason is that in the absence  
192 of the positive feedback loop, *lyt* needs to have strong basal expression in order to sustain high  
193 concentration of Lys, whose gene is activated by Lyt, at MoI of 2. Equivalently, the desired  
194 high concentration of Lyt at MoI of 1, also leads to excessive production of Lys at the same  
195 MoI. Thus, both proteins are present in similar amounts at both MoIs. In hindsight, one notes  
196 that the equations for Lyt and Lys are almost identical for this model.

**Table 2:** Average and SD of SQs under deterministic and stochastic conditions for various thresholds of stochastic success rate.

| model             | Deterministic AVG SQ |                    | Deterministic AVG SQ    |                    | Stochastic AVG SQ |                    |
|-------------------|----------------------|--------------------|-------------------------|--------------------|-------------------|--------------------|
|                   | (SD)                 |                    | (SD)                    |                    | (SD)              |                    |
|                   |                      |                    | (SSR <sup>a</sup> ≥ 95) |                    | (SSR ≥ 95)        |                    |
|                   | a=2, b=2             | a=2, b=4           | a=2, b=2                | a=2, b=4           | a=2, b=2          | a=2, b=4           |
| 1A_Lyt_Lys        | 0.9917<br>(0.0106)   | 0.9896<br>(0.0049) | 0.9898<br>(N/A)         | 0.9905<br>(0.0043) | 0.7997<br>(N/A)   | 0.6204<br>(0.0624) |
| 1A_Lyt(1)_Lys     | 0.9950<br>(0.0053)   | 0.9923<br>(0.0045) | none                    | none               | none              | none               |
| 1B_Lyt_Lys        | 0.9806<br>(0.0236)   | 0.9769<br>(0.0277) | 0.9971<br>(N/A)         | 0.9270<br>(N/A)    | 0.7995<br>(N/A)   | 0.7679<br>(N/A)    |
| 2_Lyt_Lys         | 0.5283<br>(0.0696)   | 0.8917<br>(0.1766) | none                    | 0.5001<br>(N/A)    | none              | 0.2725<br>(N/A)    |
| 3_Lyt_Lys         | 0.9938<br>(0.0078)   | 0.9873<br>(0.0157) | none                    | none               | none              | none               |
| 4_Lyt_Lys         | 0.4751<br>(0.0043)   | 0.4956<br>(0.0006) | none                    | 0.4956<br>(0.0006) | none              | 0.2983<br>(0.0102) |
| 6_Lyt_Lys         | 0.9988<br>(0.0004)   | 0.9876<br>(0.0135) | none                    | none               | none              | none               |
| Lyt_Lys_CII       | 0.9855<br>(0.0155)   | N/A                | 0.9573<br>(N/A)         | N/A                | 0.7526<br>(N/A)   | N/A                |
| Lyt_Lys_CII(1)    | 0.9801<br>(0.0151)   | N/A                | 0.9718<br>(N/A)         | N/A                | 0.7595<br>(N/A)   | N/A                |
| Lyt(1)_Lys_CII(1) | 0.9894<br>(0.0134)   | N/A                | none                    | N/A                | none              | N/A                |

<sup>a</sup> SSR = Stochastic Success Rate

197 In order to examine the significance of cooperativity in positive feedback here, another set  
198 of Hill coefficients, viz.  $a=2$ ,  $b=1$ , was also considered for 1A\_Lyt\_Lys. However, parameter  
199 sets generated by this set gave SQs which were almost equal to zero. For models having  
200 the positive feedback loop, average SQ of parameter sets was very slightly, almost negligibly,  
201 greater for Hill coefficients' set of  $a=2$ ,  $b=2$  than that for set of  $a=2$ ,  $b=4$ .  
202

### 203 **Closer to the real GRN: the three-protein model**

204 In order to further verify if 1A\_Lyt\_Lys represents reduced form of lambda's GRN, I consider  
205 a three-protein model which is very close to the real GRN and show that it is equivalent to  
206 a two-protein model possessing the positive feedback loop: 1B\_Lyt\_Lys. A CII-like protein  
207 is added to 1A\_Lyt\_Lys beside extending the role of Lyt. Since genes *lyt* and *cII* are under  
208 the control of same promoter, in order to allow for potentially different rates of translation  
209 of their corresponding cistrons during stochastic simulations, their mRNAs are considered  
210 explicitly. The role of Lyt in this model is identical to that of Cro in lambda phage's GRN.  
211 That is, now Lyt represses transcription of *lys*, in addition to repressing that of its own gene.  
212 The role of CII in the three-protein model is to activate transcription of *lys*. This corresponds  
213 to CII's activation of *pRE* promoter, leading to synthesis of mRNA which contains orf for *cI*.  
214 The three-protein model considered here is different from that in [7], in which CII activates  
215 transcription of *cI* from a distinct (*pRE*) promoter. Since in the three-protein model, CII has  
216 to compete with Lyt, which represses transcription of *lys*, for binding to the intergenic region,  
217 the demonstration of equivalence of the three-protein model (Lyt\_Lys\_CII) with 1A\_Lyt\_Lys,  
218 or any of its variants, gets more challenging. The degradation constants for  $xz$  (concentration  
219 of *lyt-cII* mRNA),  $X$  (concentration of Lyt),  $Z$  (concentration of CII), and  $Y$  (concentration of  
220 Lys), viz.  $k_6$ ,  $k_7$ ,  $k_9$ ,  $k_8$ , respectively, are taken to be unity for the same reason why degradation  
221 constants for two-protein models were set equal to 1. Since for 1A\_Lyt\_Lys SQs generated by  
222 Hill coefficients' set of  $a=2$ ,  $b=2$  were as high as SQs generated by that of  $a=2$ ,  $b=4$ , applying  
223 occam's razor, Hill coefficients for binding of Lyt and Lys are taken to be 2 and 2, respectively,

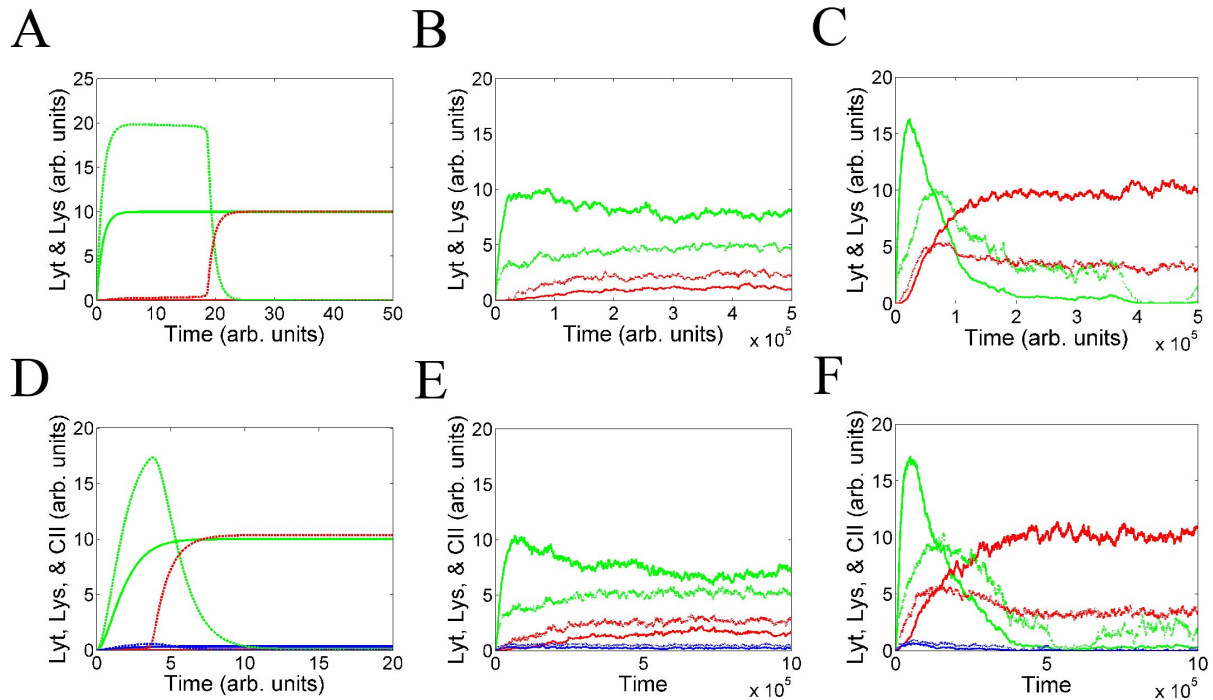

**Figure 4:** Deterministic and stochastic simulations of the minimalist two-protein model (1A\_Lyt\_Lys) and three-protein model (Lyt\_Lys\_CII). Lyt, Lys, and CII are represented by green, red, and blue, respectively. For deterministic simulations, concentrations of proteins at MoI of 1 and 2 are depicted by solid curve and dashed curve, respectively. For stochastic simulations, solid curve and dotted curve, respectively, represent average and standard deviation of number of protein molecules from 500 simulations. For a given model, the parameter set which had maximum stochastic success rate was used for simulation. The stochastic simulation trajectories shown here are qualitatively similar to those of all other models for parameter sets with high stochastic success rate; whereas, the deterministic simulation trajectories were so, irrespective of stochastic success rate. In stochastic simulation graphs, the original abscissa, which had unequally spaced time intervals, was converted to one with equally spaced time intervals. Each (arb.) unit of abscissa was divided into 10000 intervals. For the tiny fraction of intervals which still contained more than one event, their last events were defined to be their only events. **(A)** Deterministic simulations of 1A\_Lyt\_Lys. At MoI of 2, initially, the concentration of Lyt becomes more than its equilibrium concentration at MoI of 1 but then comes back to very low level. It is due to double initial rate of production of Lyt at MoI of 2 as compared to that at MoI of 1; however, as Lyt's concentration increases, *lys*' transcription becomes stronger, leading to production of Lys, which in turn represses *lyt*. **(B-C)** Stochastic simulations of 1A\_Lyt\_Lys for MoI of 1 and 2, respectively. **(D)** Deterministic simulations of Lyt\_Lys\_CII. At MoI of 2, initially, concentrations of Lyt and CII become more than their respective equilibrium concentrations at MoI of 1 but then come back to very low levels. This was also observed for a three-protein model, which is very similar to that of this paper, in a theoretical study [7]. Analogous to the two-protein model, it's due to heightened initial rate of production of CII at MoI of 2 as compared to that at MoI of 1; however, as CII's concentration increases, transcription of *lys* becomes stronger, leading to production of Lys, which represses *lyt* and *cI*. **(E-F)** Stochastic simulations of Lyt\_Lys\_CII for MoI of 1 and 2, respectively. Bell-shaped curve for CII at MoI of 6 was reported by an experimental study [2].

224 not 2 and 4. Further, taking lead from here, Hill coefficient for CII's binding is considered to  
 225 be 2, even though it has been shown to exist as tetramer in solution [14] and in crystallized free  
 226 and DNA-bound state [15].

227 Model equations for three-protein model are as follows.

228

229

230 Transcription of *lyt-cII* gene: 
$$\frac{dxz}{dt} = \frac{mk_1(1 + \frac{Z^a}{K_{D3}})}{1 + \frac{X^a}{K_{D1}} + \frac{Y^b}{K_{D2}} + \frac{Z^a}{K_{D3}}} - k_6xz \quad (15)$$

231 Translation of *lyt*: 
$$\frac{dX}{dt} = k_2xz - k_7X \quad (16)$$

232 Translation of *cII*: 
$$\frac{dZ}{dt} = k_4xz - k_9Z \quad (17)$$

233 Production of Lys: 
$$\frac{dY}{dt} = \frac{m(k_5\frac{Y^b}{K_{D2}} + k_3\frac{Z^a}{K_{D3}})}{1 + \frac{X^a}{K_{D1}} + \frac{Y^b}{K_{D2}} + \frac{Z^a}{K_{D3}}} - k_8Y \quad (18)$$

234 Equilibrium values of  $xz$ ,  $X$ ,  $Z$ , and  $Y$  are

$$k_6\bar{xz} = \frac{mk_1(1 + \frac{\bar{Z}^a}{K_{D3}})}{1 + \frac{\bar{X}^a}{K_{D1}} + \frac{\bar{Y}^b}{K_{D2}} + \frac{\bar{Z}^a}{K_{D3}}} \quad (19)$$

$$k_7\bar{X} = k_2\bar{xz} \quad (20)$$

$$k_9\bar{Z} = k_4\bar{xz} \quad (21)$$



$$k_8 \bar{Y} = \frac{m(k_5 \frac{\bar{Y}^b}{K_{D2}} + k_3 \frac{\bar{Z}^a}{K_{D3}})}{1 + \frac{\bar{X}^a}{K_{D1}} + \frac{\bar{Y}^b}{K_{D2}} + \frac{\bar{Z}^a}{K_{D3}}} \quad (22)$$

235 From (20) and (21), it can be seen that equilibrium value of CII is in constant proportion to that  
 236 of Lyt. Hence, CII can be written in terms of Lyt

$$\bar{Z} = p\bar{X} \quad (23)$$

237 where

$$p = \frac{k_4 k_7}{k_2 k_9}$$

238 Using (20) and (23), (19) and (22) can be written as

$$\bar{X} = \frac{m \frac{k_1 k_2}{k_6 k_7} (1 + \frac{(p\bar{X})^a}{K_{D3}})}{1 + \bar{X}^a (\frac{1}{K_{D1}} + \frac{p^a}{K_{D3}}) + \frac{\bar{Y}^b}{K_{D2}}} \quad (24)$$

$$\bar{Y} = \frac{m \frac{1}{k_8} (k_5 \frac{\bar{Y}^b}{K_{D2}} + k_3 \frac{(p\bar{X})^a}{K_{D3}})}{1 + \bar{X}^a (\frac{1}{K_{D1}} + \frac{p^a}{K_{D3}}) + \frac{\bar{Y}^b}{K_{D2}}} \quad (25)$$

239 The equivalence of equations (24) and (25) to the defining equations of 1B\_Lyt\_Lys which  
 240 have reached equilibrium validates two-protein model. Two-protein model being sufficient for  
 241 producing lysis/lysogeny switch constitutes an argument that *cro* in lambda's GRN is expendable.  
 242 Mathematically, the reason for Cro being expendable lies in its equilibrium concentration being  
 243 proportional to that of CII.

244 Kobiler et al. [2] showed that infection with lambda lacking *cro* gene ( $\lambda_{cro^-}$ ) leads to  
 245 production of CII to level sufficient to cause lysogeny even at MoI of 1. This, however, does  
 246 not mean that Cro, per se, is required to engender lytic development. Cro represses *pL* and

247 *pR* by fourfold and twofold, respectively [12]. Thus, the absence of Cro increases the level  
248 of CII in two ways: first, by allowing transcription of *cII*, which is under the control of *pR*,  
249 and *cIII*, which is under the control of *pL* and whose product prevents degradation of CII by  
250 protease HflB. In the wild type strain, parameters associated with transcription rates of *cII* and  
251 *cIII*, translation and degradation rates of their respective mRNAs, and degradation rates of CII  
252 and CIII are such that enough CII is produced, despite Cro's repression of *pL* and *pR*, at higher  
253 MoIs so as to sufficiently activate *pRE* promoter, leading to production of CI to level which  
254 is enough to cause lysogeny. However, when *cro* is deleted, CI produced even at MoI of 1 is  
255 enough to engender lysogeny. With appropriate changes in the aforementioned parameters, it  
256 would be possible to model  $\lambda_{cro^-}$  strain which behaves like its wild type counterpart.

257 As stated above, there are experimental evidences for CII present as tetramer in solution  
258 [14] and in crystallized free and DNA-bound state [15]. Additionally, as Figure 4 in [10] shows,  
259 the binding curve of CII to *pAQ* has appreciable lag phase, indicating that it binds as a multimer.  
260 However, Figure 2c in [2] shows that curve of *pRE*'s activity with respect to CII levels is not  
261 sigmoidal as expected from multimeric binding, but hyperbolic as seen in monomeric binding.  
262 Therefore, another model was considered where the Hill coefficient for CII binding was taken to  
263 be 1 (Lyt\_Lys\_CII(1)). Additionally, one more model was considered where the Hill coefficient  
264 for Lyt too was taken to be 1 (Lyt(1)\_Lys\_CII(1)). This made the current author go back to  
265 two-protein models and consider 1A\_Lyt\_Lys model too with Hill coefficients' set of a=1, b=2  
266 and a=1, b=4, named 1A\_Lyt(1)\_Lys. SQs generated by all new variants were similar in values  
267 to those generated from their counterparts, where the Hill coefficient of either Lyt or CII, or  
268 both, were taken to be 2. Specifically, for 1A\_Lyt(1)\_Lys all SQs were more than 0.98 for both  
269 sets of Hill coefficients. For all of the three protein models, all SQs were greater than 0.95. Just  
270 like the Hill coefficients' set of a=2, b=1, parameter sets generated by the set of a=1, b=1 gave  
271 SQs which were almost equal to zero.

272

## 273 Stochastic simulation

274 Since gene expression is stochastic [17,18], the real validity of results obtained in the deterministic  
 275 simulations lie in their being replicated in the stochastic simulations. Thus, stochastic simulations  
 276 were performed, using Gillespie algorithm [19], for parameter sets obtained in the deterministic  
 277 simulations.

278 For both two-protein and three-protein models, for any given parameter set, SQ generated  
 279 in the stochastic simulation, or stochastic switch quotient (SSQ), was less than its deterministic  
 280 counterpart, or deterministic switch quotient (DSQ). No parameter set was able to produce  
 281 switch in every run during stochastic simulation. That is because either the SSQ was negative  
 282 ( $S_1 < S_2$ ) or, rarely,  $S_3$  was zero. Percentage of runs that produce finite, positive SQs during  
 283 stochastic simulation for a given parameter set and set of Hill coefficients would henceforth be  
 284 referred to as stochastic success rate.

**Table 3:** Number of parameter sets for various ranges of stochastic success rate.

| model             | SSR <sup>a</sup> ≥ 95 |            | 95 > SSR ≥ 90 |            | 90 > SSR ≥ 80 |            | Total no. of parameter sets |            |
|-------------------|-----------------------|------------|---------------|------------|---------------|------------|-----------------------------|------------|
|                   | a=2<br>b=2            | a=2<br>b=4 | a=2<br>b=2    | a=2<br>b=4 | a=2<br>b=2    | a=2<br>b=4 | a=2<br>b=2                  | a=2<br>b=4 |
| 1A_Lyt_Lys        | 1                     | 4          | 5             | 3          | 10            | 3          | 21                          | 17         |
| 1A_Lyt(1)_Lys     | 0                     | 0          | 1             | 1          | 3             | 9          | 17                          | 15         |
| 1B_Lyt_Lys        | 1                     | 1          | 1             | 5          | 2             | 2          | 11                          | 11         |
| 2_Lyt_Lys         | 0                     | 1          | 0             | 0          | 0             | 0          | 6                           | 6          |
| 3_Lyt_Lys         | 0                     | 0          | 0             | 0          | 1             | 4          | 8                           | 10         |
| 4_Lyt_Lys         | 0                     | 2          | 0             | 0          | 0             | 0          | 2                           | 2          |
| 6_Lyt_Lys         | 0                     | 0          | 0             | 0          | 0             | 0          | 12                          | 12         |
| Lyt_Lys_CII       | 1                     | N/A        | 2             | N/A        | 1             | N/A        | 9                           | N/A        |
| Lyt_Lys_CII(1)    | 1                     | N/A        | 1             | N/A        | 5             | N/A        | 9                           | N/A        |
| Lyt(1)_Lys_CII(1) | 0                     | N/A        | 1             | N/A        | 1             | N/A        | 9                           | N/A        |

<sup>a</sup> SSR = Stochastic Success Rate

285 An interesting property was observed for mutual repression model for Hill coefficients' set  
 286 of a=2, b=4. It was the only set of Hill coefficients for any model lacking the positive feedback  
 287 that produced a DSQ more than 0.9 (highest SQ for the same model for Hill coefficients' set of  
 288 a=2, b=2 was 0.6666). As aforementioned, all of the parameter sets for Hill coefficients' set of

289  $a=2$ ,  $b=4$  produced DSQ of more than 0.9 except one, whose DSQ was 0.5. Notably, this is the  
290 parameter set which had very high stochastic success rate, viz. that of 97%; while, maximum  
291 stochastic success rate among other parameter sets was 50%. This peculiar result for mutual  
292 repression has been reported earlier also.

293 Avlund et al. showed that various two-protein models, based upon mutual repression  
294 model, which were able to produce switch in a noise-less environment, did not function when  
295 noise was introduced [9]. However, additional CII-like protein conferred robustness to noise  
296 in 8% of the parameter sets that produced switch deterministically. The different behaviour  
297 of mutual repression model in deterministic simulations with respect to stochastic simulations  
298 warrants theoretical investigation. Notably, one of their rare two-protein models (i.e., b of  
299 Figure 2) which did produce switch even in the presence of noise (though with much lower  
300 success as compared to their three-protein models) is model 6\_Lyt\_Lys in the current paper.

301 Thus, taking into account the stochastic success rate of at least 95%, two-protein models  
302 can be divided into two sets based upon DSQs or SSQs. One set comprises of two models  
303 with the positive feedback loop, viz. 1A\_Lyt\_Lys and 1B\_Lyt\_Lys, and another without it, viz.  
304 2\_Lyt\_Lys and 4\_Lyt\_Lys. The one with the positive feedback loop has appreciably higher  
305 DSQs and SSQs than the one without it.

306 However, for the same stochastic success rate cut-off, the lowest SSQ among parameter  
307 sets with Hill coefficients' set of  $a=2$ ,  $b=2$  was greater than the highest SSQ among those  
308 with Hill coefficients' set of  $a=2$ ,  $b=4$ , for any given model (data not shown). This trend gets  
309 confirmed if one considered more parameter sets, viz. by relaxing the cut-off of stochastic  
310 success rate from 95% to 90%. The relaxation lets the inclusion of 1A\_Lyt(1)\_Lys in the  
311 analysis. This result is against one's expectation: since Lys activating transcription of its own  
312 gene in a cooperative manner is crux of the switch, increasing Hill coefficient of Lys should  
313 have, if at all, increased the SSQ. This comparison could not be made in models without the  
314 positive feedback loop because none of their parameter sets with Hill coefficients' set of  $a=2$ ,  
315  $b=2$  had stochastic success rate of at least 90%.

316

**Table 4:** Maximum stochastic success rate.

| model             | Hill coefficients' set | Maximum stochastic success rate |
|-------------------|------------------------|---------------------------------|
| 1A_Lyt_Lys        | a=2, b=4               | 96.8                            |
| 1A_Lyt(1)_Lys     | a=1, b=2               | 91                              |
| 1B_Lyt_Lys        | a=2, b=4               | 97.2                            |
| 2_Lyt_Lys         | a=2, b=4               | 97                              |
| 3_Lyt_Lys         | a=2, b=4               | 87                              |
| 4_Lyt_Lys         | a=2, b=4               | 98.8                            |
| 6_Lyt_Lys         | a=2, b=4               | 73                              |
| Lyt_Lys_CII       | a=2, b=2, c=2          | 95.5                            |
| Lyt_Lys_CII(1)    | a=2, b=2, c=1          | 97                              |
| Lyt(1)_Lys_CII(1) | a=1, b=2, c=1          | 93.5                            |

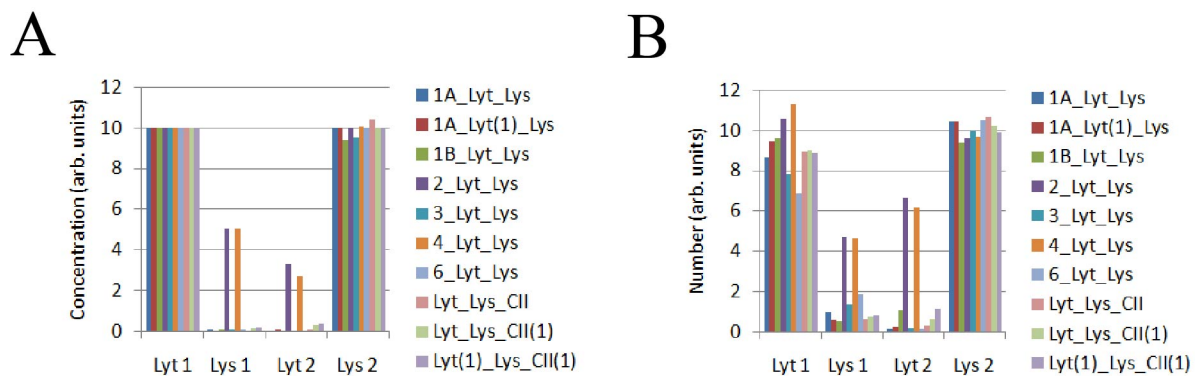

**Figure 5:** Equilibrium values correspond to those parameter sets which gave maximum stochastic success rate for their respective models (see Table 4). (A) Deterministic simulations. (B) Stochastic simulations. Note how the values of Lys at MoI of 1 and Lyt at MoI of 2 for 2\_Lyt\_Lys and 4\_Lyt\_Lys are much higher than those of the any other model.

## 317 **Bistability at MoI of 1 and lysogen stability**

318 In this study, parameter sets were searched for their ability to cause lysis at MoI of 1 and  
319 lysogeny at MoI of 2. However, if only one of the phage genomes gets integrated into the  
320 bacterial chromosome, it would not be able to maintain lysogeny, and lysis would ensue, if  
321 only one stable state existed at MoI of 1. In the deterministic simulations, all of the two-protein  
322 models possessing the positive feedback exhibited bistability at MoI of 1 for all of the parameter  
323 sets, except one (for 1B\_Lyt\_Lys). In the other stable state, the concentration of Lyt is almost  
324 zero and that of Lys is about half of its concentration at MoI of 2. Arguably, in the real system,  
325 the level of Lys in the second stable state would be high enough to maintain lysogeny.

326 For 4\_Lyt\_Lys, none of the parameter sets produced bistability at MoI of 1. For 2\_Lyt\_Lys,  
327 for Hill coefficients set of  $a=2$ ,  $b=2$  one parameter set generated bistability at MoI of 1, but its  
328 stochastic success rate was just 7.6% (Bistability exists for two more parameter sets, but their  
329 second stable states are at very high values of Lyt ( $>50$ ) and very low values of Lys ( $<2$ ); hence,  
330 inconsequential for lysogeny maintenance, and in any case, never reached by the phase point).  
331 For Hill coefficients set of  $a=2$ ,  $b=4$ , the only parameter set which did not exhibit bistability  
332 at MoI of 1 had stochastic success rate of 97%, while maximum stochastic success rate among  
333 other parameter sets was 50% (as aforementioned in the section for stochastic simulations). All  
334 of the three-protein models exhibited bistability at MoI of 1. The Lyt and Lys values of second  
335 stable states at MoI of 1 in three-protein models are about same as those of second stable states  
336 in two-protein models at the said MoI.

337 DNA between OL and OR sites forms a loop that has been shown to be important for the  
338 stable maintenance of lysogeny [12]. The loop forms due to interaction between CI dimers  
339 bound at OL1 and OL2 with those bound at OR1 and OR2 [13]. Therefore, the contribution of  
340 OL-CI-OR complex to production of CI would be represented by adding a term proportional to  
341  $[CI]^8$ , raised to the power 8, to numerator and denominator. Since bistability at MoI of 1 in the  
342 two-protein models is the consequence of *lys*' transcription getting activated by its own product  
343 in a cooperative manner (i.e., by the binding of Lys dimer), in the real GRN, activation of *cI*'s

344 promoter present in a looped DNA, stabilized by CI octamer, would either generate bistability  
345 or contribute to already existing bistability due to two CI dimers activating the transcription of  
346 *cI*. Thus, it is reasonable to propose that the role of OL-CI-OR loop formation is to produce or  
347 strengthen bistability at MoI of 1. This argument becomes stronger in the light of the finding  
348 that looping also activates transcription from *pRM* by allowing the  $\alpha$ -CTD of RNAP bound at  
349 *pRM* to contact UP element at OL [16]. In the stochastic simulations, however, none of the  
350 two-protein and three-protein models produced bistability at MoI of 1.

351 At MoI of 2, only two models, viz. 2\_Lyt\_Lys and 6\_Lyt\_Lys, show bistability for about  
352 80% and 60%, respectively, of the parameter sets. Notably, only these two models have Lyt  
353 repressing the transcription of *lys*. Since at the second stable state the concentration of Lyt is  
354 very high and that of Lys is very low, a parameter set would not, if at all, generate switch with  
355 high DSQ if its phase point reached this stable fixed point. Hence, bistability at MoI of 2 is  
356 inconsequential.

357

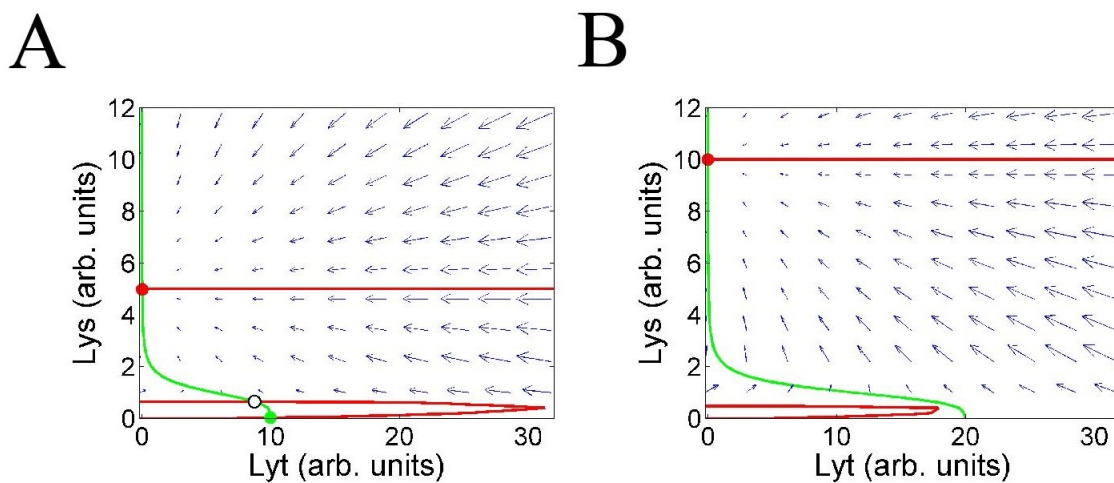

**Figure 6:** (A-B)Phase diagram of 1A\_Lyt\_Lys corresponding to the parameter set that gave maximum stochastic success rate, at MoI of 1 and 2. Green and red full circles are stable fixed points, whereas empty black circle is unstable fixed point. Green stable point is where system reaches when a single phage infects a bacterium. Red stable point is where system reaches when lysogeny is established by two phages, but only one of them gets integrated into the host's genome.

## 358 **Why positive feedback?**

359 There can be two reasons why lysis/lysogeny switch is based upon the positive feedback: 1)  
360 biological properties of the switch, viz. a) highest switch quotient and presence of bistability  
361 at MoI of 1, and 2) quickest evolution of such a model. It should be noted, however, that speed  
362 of evolution would not matter if evolution is path-independent. That is, it's possible that nature  
363 initially evolves a sub-optimal design but which, given enough time, gets superseded by an  
364 optimal one.

365 Switch quotient: As mentioned in the previous sections, SQs generated in the deterministic  
366 and the stochastic simulations, respectively, for models possessing the positive feedback are  
367 much greater than those of the models lacking positive feedback.

368 Bistability at MoI of 1: As stated in the last section, for models not possessing the positive  
369 feedback loop, no parameter set, if at all, having sufficiently good stochastic success rate  
370 generated bistability. If one ignores the possibility of any other mechanism generating bistability,  
371 such as the formation of OL-CI-OR complex, this reason alone is sufficient for nature to choose  
372 models which possess the positive feedback loop over those which do not.

373 Speed of evolution: Even though the maximum stochastic success rate is very low for 3\_Lyt\_Lys  
374 and (especially) 6\_Lyt\_Lys, they are still compared with 4\_Lyt\_Lys and 2\_Lyt\_Lys, respectively,  
375 as these two are the only pairs within which mathematical comparison with regard to the  
376 positive feedback loop is possible. 2\_Lyt\_Lys and 4\_Lyt\_Lys differ from 6\_Lyt\_Lys and 3\_Lyt\_Lys,  
377 respectively, only in not having the positive feedback loop. Thus, model equations of former  
378 two models differ from those of latter two only in the dynamics of Lys. In models with the  
379 positive feedback loop, the term representing binding of Lys to the intergenic region (i.e.,  
380  $Y^b/K_{D2}$ ) is multiplied by a transcription rate constant,  $k_4$ , representing activation of transcription  
381 of *lys* by Lys. On the other hand, in models without the positive feedback loop,  $Y^b/K_{D2}$  is  
382 multiplied by  $k_3$ , the rate of basal expression of *lys*. Thus, 2\_Lyt\_Lys and 4\_Lyt\_Lys can be  
383 thought of as being equivalent to 6\_Lyt\_Lys and 3\_Lyt\_Lys, respectively, whose  $k_4$  is equal to  $k_3$ .  
384 That is, the former two models are those latter two models, respectively, whose rate constant for



385 transcriptional activation of *lys* by Lys is equal to the basal expression rate of *lys*. This constrain  
386 of having  $k_3 = k_4$  reduces the potential parameter space for 2\_Lyt\_Lys and 4\_Lyt\_Lys by one  
387 dimension. Hence, the two parameters being independent in 3\_Lyt\_Lys and 6\_Lyt\_Lys makes  
388 nature more likely to discover them. This explains why 2\_Lyt\_Lys (11, 11) and 4\_Lyt\_Lys (2,  
389 2) produced fewer parameter sets than 6\_Lyt\_Lys (16, 16) and 3\_Lyt\_Lys (11, 13), respectively,  
390 for both sets of Hill coefficients during the order search (as shown in the parenthesis).

391 Now, qualitative equivalence of 3\_Lyt\_Lys and 6\_Lyt\_Lys with 1B\_Lyt\_Lys, which is equivalent  
392 to 1A\_Lyt\_Lys, is shown. 1B\_Lyt\_Lys is qualitatively equivalent to 3\_Lyt\_Lys for the reason that  
393 in the former, transcriptional activation of *lys'* is achieved by binding of Lyt to its promoter;  
394 whereas, in the latter, *lys* possesses basal expression. 6\_Lyt\_Lys differs from 3\_Lyt\_Lys in  
395 having Lyt as a repressor of *lys*. This interaction is expendable, as at MoI of 2, concentration of  
396 Lyt is anyway very low, and qualitatively speaking, at MoI of 1 repression of *lys* by Lyt can be  
397 compensated by reducing basal expression of *lys*. For a given set of Hill coefficients, average  $k_3$   
398 is at least a few times higher for 6\_Lyt\_Lys as compared to that for 3\_Lyt\_Lys (data not shown).  
399

## 400 **Methods**

### 401 **Derivation of model equations**

402 The model, using the fact that binding of protein to itself or DNA is a much quicker process than  
403 transcription and translation, assumes quick equilibration for the processes of protein binding  
404 to itself or DNA. In the expressions below, P, X, and Y are promoter, Lys, and Lyt, respectively.

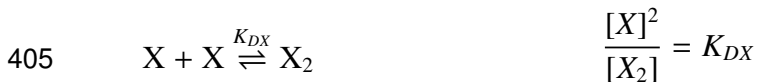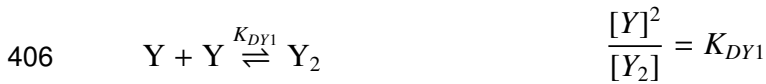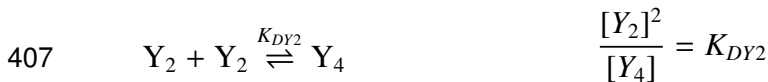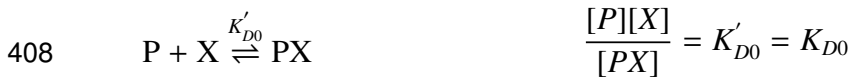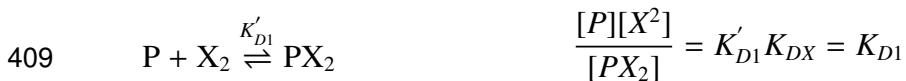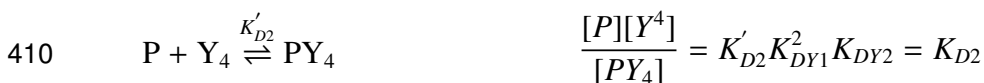

411 Above expressions for concentrations of promoter-protein complexes are for cases where a) Lyt  
412 binds as monomer, b) Lyt binds as dimer, and c) Lys binds as tetramer. They exhaust all other  
413 cases, viz. monomeric and dimeric Lys, and monomeric and dimeric CII.

414 Processes of transcription and translation are not considered explicitly except for *lyt-CII*  
415 genes in three-protein models. Hence, the model equations describe concentrations of proteins

416 only. With expressions for concentrations of promoter-protein complexes, one can write generalized  
417 form of the term representing protein production.

418

$$\frac{b + \sum_i k_i \cdot [DNA - Prot_i]}{[Unbound DNA] + \sum_i k_i \cdot [DNA - Prot_i]}$$

419

420 where  $b$  is, in case present, basal expression and  $k_i$  is rate constant for transcriptional activation  
421 by  $i_{th}$  protein.

422 Parameter sets, viz. rate constants and dissociation constants, of model equations were  
423 searched deterministically in two stages, viz. order search and linear search (as they are named  
424 here). In the order search, rate constants and dissociation constants were searched as 3's  
425 exponent, which was varied between -5 and 5 with the difference of 1, in a nested fashion.  
426 Thus, the number of parameter sets searched was equal to the number of parameters raised  
427 to the power 11. Notably, switch quotients generated by this approach are unrefined because  
428 rate constants and dissociation constants were increased geometrically, thereby causing a lot  
429 of intervening values to remain unsampled. Therefore, parameter sets generated from order  
430 search were further refined by linear search, which searches the neighbourhood of parameter  
431 set arithmetically. It was noted that parameter sets, generated in the order search, whose SQs  
432 were too close to each other (identical up to at least two decimal places) were either rescaled  
433 form of each other, or differed in those parameters to which SQ was resilient up to a certain  
434 range. Thus, in order to remove redundancy and in the interest of time, for linear search, the  
435 parameter sets were taken in such a way that the difference between consecutive SQs is at least  
436 0.01.

437 Parameter sets, and thus accompanied SQs, generated through order search were refined  
438 by linear search in the following way. The value of each parameter (say,  $V$ ) of a set was  
439 varied between  $-3 \cdot V/5$  and  $3 \cdot V/5$  with the increment of  $V/5$ , in a nested fashion. Thus, the  
440 number of parameter sets searched was equal to the number of parameters raised to the power  
441 7. However, for three-protein model, which had eight parameters, in the interest of saving time,  
442 each parameter was varied between  $-2 \cdot V/5$  and  $2 \cdot V/5$  with the increment of  $V/5$ , in a nested

443 fashion. Search was ended if the latest SQ was either lower than the previous one (which never  
444 happened) or if  $((\text{latest SQ} - \text{previous SQ})/\text{previous SQ})$  was less than 0.01. Again, in the  
445 interest of saving time, for three-protein model, the search was ended if the SQ at the end of  
446 the last iteration was more than or equal to 0.95. It should be noted that linear search is path  
447 dependent: it may happen that a path which initially yields lower SQs leads to higher SQ in  
448 the end than a path which initially yields higher SQs, and thus, treaded by the search. For both  
449 order and linear search and for all of the models, in order to expedite search, those parameter  
450 sets were rejected whose accompanying SQ was lower than the SQ of the previous parameter  
451 set. The values of the parameters were normalized such that the Lyt's equilibrium concentration  
452 was 10 arb. units. This was done for two purposes: a) to ensure that lowest values of Lyt at  
453 MoI of 1 and Lys at MoI of 2 never drop to zero in the stochastic simulations; b) in order to  
454 make comparison of parameter sets and equilibrium values of proteins visually easier. For both  
455 order and linear search, simulations were carried for time 100 arb. units. Thus, there was a  
456 possibility of a system of equations, defining a particular model, not reaching equilibrium in  
457 100 arb. units for a given parameter set. In order to eliminate such parameter sets, simulations  
458 were done for  $10^5$  arb. units. Only few parameter sets had not reached equilibrium, and all  
459 of such parameter sets produced negative SQ. In order to calculate stochastic switch quotie nt,  
460 levels of proteins were averaged between 100 and 200 arb. units. The transient kinetics, viz.  
461 inital rise and plateauing at MoI of 1 and bell-shaped trajectory MoI 2, were completed at most  
462 by 50 arb. units.

## 463 **Acknowledgement**

464 The author thanks Dr. Supreet Saini for hosting him in his lab in the Department of Chemical  
465 Engineering at IIT Bombay.

## 466 **References**

- 467 [1] Kourilsky P (1973) Lysogenization by bacteriophage lambda. I. Multiple infection and  
468 the lysogenic response. *Mol. Gen. Genet.* 122:183-195.
- 469 [2] Kobiler O, Rokney A, Friedman N, Court DL, Stavans J, Oppenheim AB (2005)  
470 Quantitative kinetic analysis of the bacteriophage lambda genetic network. *Proc Natl*  
471 *Acad Sci U S A* 102:4470-4475.
- 472 [3] Avlund M, Dodd IB, Semsey S, Sneppen K, Krishna S (2009) Why do phage play dice?  
473 *J Virol.* 83:11416-11420.
- 474 [4] Kourilsky P (1974) Lysogenization by bacteriophage lambda. II. Identification of genes  
475 involved in the multiplicity dependent processes. *Biochimie* 56:1517-1523.
- 476 [5] Banuett F, Hoyt MA, McFarlane L, Echols H, Herskowitz I (1986) hflB, a new  
477 *Escherichia coli* locus regulating lysogeny and the level of bacteriophage lambda cII  
478 protein. *J Mol Biol* 187:213-224.
- 479 [6] Kobiler O, Rokney A, Oppenheim AB (2007) Phage lambda CIII: a protease inhibitor  
480 regulating the lysis-lysogeny decision. *PLoS One* 2:e363.
- 481 [7] Weitz JS, Mileyko Y, Joh RI, Voit EO (2008) Collective decision making in bacterial  
482 viruses. *Biophys J* 95:2673-2680.
- 483 [8] Court DL, Oppenheim AB, Adhya SL (2007) A new look at bacteriophage lambda  
484 genetic networks. *J Bacteriol* 189:298-304.
- 485 [9] Avlund M, Krishna S, Semsey S, Dodd IB, Sneppen K. (2010) Minimal gene regulatory  
486 circuits for a lysis-lysogeny choice in the presence of noise. *PLoS One* 5:e15037.
- 487 [10] Hoopes BC, McClure WR (1985) A cII-dependent promoter is located within the Q gene  
488 of bacteriophage lambda. *Proc Natl Acad Sci U S A* 82:3134-3138.

- 489 [11] Ho YS, Rosenberg M (1985) Characterization of a third, cII-dependent, coordinately  
490 activated promoter on phage lambda involved in lysogenic development. *J Biol Chem*  
491 260:11838-11844.
- 492 [12] Svenningsen SL, Costantino N, Court DL, Adhya S (2005) On the role of Cro in lambda  
493 prophage induction. *Proc Natl Acad Sci U S A* 102: 4465-4469.
- 494 [13] Révet B, von Wilcken-Bergmann B, Bessert H, Barker A, Miller-Hill B (1999) Four  
495 dimers of lambda repressor bound to two suitably spaced pairs of lambda operators
- 496 [14] Ho Y, Lewis M, Rosenberg M (1982) Purification and properties of a transcriptional  
497 activator. The cII protein of phage lambda. *J Biol Chem* 257: 9128-9134.
- 498 [15] Jain D, Kim Y, Maxwell KL, Beasley S, Zhang R, Gussin GN, Edwards AM, Darst SA  
499 (2005) Crystal structure of bacteriophage lambda cII and its DNA complex. *Molecular*  
500 *Cell* 19: 259-269.
- 501 [16] Cui L, Murchland I, Shearwin KE, Dodd IB (2013) Enhancer-like long-range  
502 transcriptional activation by CI-mediated DNA looping. *PNAS* 110: 29222927.
- 503 [17] Elowitz MB, Levine AJ, Siggia ED, Swain PS (2002) Stochastic gene expression in  
504 single cell. *Science* 297: 11831186.
- 505 [18] Golding I, Paulsson J, Zawilski SM, Cox EC (2005) Real-time kinetics of gene activity  
506 in individual bacteria. *Cell* 123: 10251036.
- 507 [19] Gillespie DT (1977) Exact stochastic simulation of coupled chemical reactions. *J Phys*  
508 *Chem* 81: 23402361.
