# 1 **Design Principle of Lysis/Lysogeny Decision vis-a-vis**

## 2 **Multiplicity of Infection**

3 Dinkar Wadhwa\*

4 Department of Chemical Engineering

5 Indian Institute of Technology Bombay, Mumbai - 400 076, India

6 `dinkar.wadhwa84@gmail.com`

7 \*The author is not currently affiliated with the institution.

8

## 9 Abstract

10 Bacteriophage lambda possesses dual strategy of replication. Upon infecting its host, *Escherichia*  
 11 *coli*, it can either choose lytic pathway, in which the host undergoes lysis, releasing hundreds  
 12 of progeny viruses, or opt for lysogeny, in which the viral genome exists as part of bacterial  
 13 chromosome known as prophage. Classic and molecular studies have shown that the lysis/lysogeny  
 14 decision depends upon the number of coinfecting phages, viz. the multiplicity of infection  
 15 (MoI): lysis at low MoI; lysogeny at high MoI. Here, by constructing an expression for quality  
 16 of the lysis/lysogeny minimalist two-protein switch which, beside another thing, demands  
 17 high equilibrium concentration of Cro-like protein (Lyt) and low equilibrium concentration  
 18 of CI-like protein (Lys) - that is, lytic development - at MoI of 1, and vice versa - that is,  
 19 lysogeny development - at MoI of 2, I demonstrate that positive feedback loop formed by  
 20 activation of *cI*'s transcription by its own product in a cooperative manner underlies the switch's  
 21 design. The minimalist two-protein model, in which Lys performs exactly the same function  
 22 as CI does in lambda phage's genetic regulatory network (GRN), is justified by showing its  
 23 analogy with the GRN responsible for lysis/lysogeny decision. Existence of another stable  
 24 state at MoI of 1 is argued to be responsible for lysogen stability. Further, by comparing the  
 25 minimalist model and its variants, possessing the positive feedback loop, with other models,  
 26 without having the positive feedback loop, such as the mutual repression model, it is shown why  
 27 lysis/lysogeny switch involving positive autoregulation of *cI* is evolved instead of one without  
 28 it. A three-protein model, which is very close to lambda's GRN, is shown to be equivalent to  
 29 a close variant of the two-protein minimalist switch. Finally, only a fraction of parameter sets  
 30 that produced switch deterministically were able to do so, if at all, under stochastic simulations  
 31 more than 95% of the time. Additionally, another stable state at MoI of 1 was not found during  
 32 stochastic simulation.

33

34 **Keywords:** Bacteriophage  $\lambda$ , switch, positive feedback, bistability

## 35 Introduction

36 Virulent bacteriophages possesses only one method of replication; that is, lytic strategy. However,  
 37 other bacteriophages have a dual perpetuation strategy, viz. lytic and lysogeny. In lytic strategy,  
 38 phage injects its genetic material into the host bacterium, viral genes are transcribed, m-RNAs,  
 39 thus produced, are translated, and phage's genetic material is replicated. Finally, the host  
 40 bacterium undergoes lysis, releasing progeny particles. In lysogeny, lytic pathway is repressed,  
 41 the viral genome is integrated into that of the host bacterium, and thus, it exists in a latent  
 42 form known as prophage. As the teleological explanation goes, lytic strategy leads to fast  
 43 multiplication, but its risky, as viral progenies have to find new hosts which don't already  
 44 contain lysogenized phages. On the other hand, a lysogenized phage replicates along with its  
 45 host, and therefore, reproduces by a slower process as compared to lytic strategy, but this way  
 46 phage safeguards its survival. Should a phage infect a bacterium containing lysogenized phage,  
 47 lambda repressors (CI) present in the cytosol will not allow expression from *p<sub>R</sub>*. Thus, the  
 48 newly entered phage would remain inert and, ultimately, get digested by the host's nucleases.

49 Classic [1] and molecular studies [2] have shown that the lysis/lysogeny decision depends  
 50 upon MoI. Avlund et al. analysed [3] Kourilsky's data [1,4] and determined the probability of  
 51 lysogeny at MoI of 1 to be almost zero, at MoI of 2 to be around 0.6960, and at all higher  
 52 MoIs to be around 0.9886. This ability of phage to choose between lysis and lysogeny based  
 53 upon multiplicity of infection is but a form of quorum sensing occurring inside a bacterium.  
 54 As described in sections below, a minimalist two-protein model, which was analogous to  
 55 lambda's GRN, and many other models were constructed. The models were evaluated on the  
 56 quality of switch they generated, by solving their defining equations using parameters, which  
 57 were searched in two steps (see Methods), and few sets of Hill coefficients. It is shown that  
 58 positive feedback loop formed by CI activating transcription of its own gene is the essence of  
 59 lysis/lysogeny switch's model. Lastly, a three-protein model is constructed which is very close  
 60 to lambda's GRN in that the roles of Lyt and Lys in the former are identical to the roles of  
 61 Cro and CI in the latter, respectively, and the function of CII-like protein in the former is fairly

62 similar to that of CII in the latter.

## 63 **Result and discussion**

### 64 **Minimalist two-protein lysis/lysogeny switch**

65 The promoter of *lyt* gene is constitutive; whereas, that of *lys* gene is positively regulated as  
 66 they are in lambda phage's GRN. The role of Lys in the minimalist two-protein model; that  
 67 is, binding cooperatively to the intergenic region, activating transcription of its own gene, and  
 68 inhibiting transcription of *lyt* gene, is identical to that of CI in lambda phage's GRN. The role  
 69 of Lyt was conceptualized from first principle in the following way. At MoI of 2, equilibrium  
 70 concentrations of Lyt and Lys should be much lower and higher, respectively, as compared to  
 71 those at MoI of 1. However, if Lyt did not bind to *lys* promoter, assuming no basal expression  
 72 of *lys* (which is weak promoter anyway), equilibrium concentration of Lyt at MoI 2 would be  
 73 even higher, let alone much lower, than that at MoI of 1. And equilibrium concentration of Lys  
 74 would be very low, instead of being high enough to repress *lyt*, at MoI of 2. Since the only  
 75 protein present to actuate any process is Lyt, it was argued that Lyt should engender lysogeny  
 76 and inhibit lytic pathway at MoI of 2.

77 Thus, Lyt activates transcription of *lys* (whose product causes lysogeny development),  
 78 represses transcription of its own gene, thereby suppressing lytic development (though, as  
 79 shown below, the last interaction is dispensable), and activates imaginary downstream pathway  
 80 which leads to lytic development. This seemingly paradoxical role of Lyt, as explained below,  
 81 is due to it being proxy for CII, which causes lysogeny, and anti-termination factor Q, which  
 82 enables transcription of lytic genes. The positive feedback loop constituted by transcriptional  
 83 activation of *lys* by its own protein causes Lys to accumulate to low concentration at MoI of 1  
 84 and high concentration at MoI of 2. Thus, at MoI of 1 Lyt's equilibrium concentration is high  
 85 because it is constitutively produced and Lys' equilibrium concentration is not high enough to  
 86 repress its production. On the other hand, at MoI of 2 Lyt's equilibrium concentration is low  
 87 because of repression by Lys, which is present in high concentration.

GRN underlying lysis/lysogeny decision is much more complex than the minimalist two-protein model proposed here, because MoI is but one of many signals taken into account by the phage to decide between lysis and lysogeny. Since the expression for quality of lysis/lysogeny switch (the switching quotient) takes equilibrium values into account, the values of degradation constants of  $X$  (concentration of Lyt) and  $Y$  (concentration of Lys), viz.  $k_2$  and  $k_5$ , respectively, can be subsumed into  $k_1$ ,  $k_3$ , and  $k_4$ . Hence, they are taken to be unity for all two-protein models. This model would henceforth be referred to as 1A\_Lyt\_Lys.

# **1A\_Cro\_CI:**

$$\frac{dX}{dt} = \frac{mk_1}{1 + \frac{X^a}{K_{D1}} + \frac{Y^b}{K_{D2}}} - k_2X \quad (1)$$

$$\frac{dY}{dt} = \frac{m(k_3 \frac{X^a}{K_{D1}} + k_4 \frac{Y^b}{K_{D2}})}{1 + \frac{X^a}{K_{D1}} + \frac{Y^b}{K_{D2}}} - k_5Y \quad (2)$$

where,  $m$  is multiplicity of infection,  $k_1$  is basal expression rate of *lys*,  $k_3$  and  $k_4$  are rate constants for transcriptional activation of *lys* by Lyt and Lys, respectively,  $K_{D1}$  and  $K_{D2}$  are the "combined" dissociation constants of Lyt and Lys, respectively (see Methods). In those models where *lys* has basal expression,  $k_3$  represents basal expression rate. Exponents  $a$  and  $b$  are Hill coefficients for binding of Lyt and Lys, respectively.

## **Analogy between the minimalist two-protein model (1A\_Lyt\_Lys) and lambda phages GRN**

Upon infection, RNA polymerase transcribes from the constitutive promoters,  $pL$  and  $pR$ , till it encounters transcription terminators  $tL1$  and  $tR1$ , respectively.  $N$  and  $cro$  genes are transcribed by  $pL$  and  $pR$ , respectively. The product of  $N$  is an anti-termination factor that modifies subsequent RNAPs initiating at  $pL$  and  $pR$  so that they move past their respective terminators

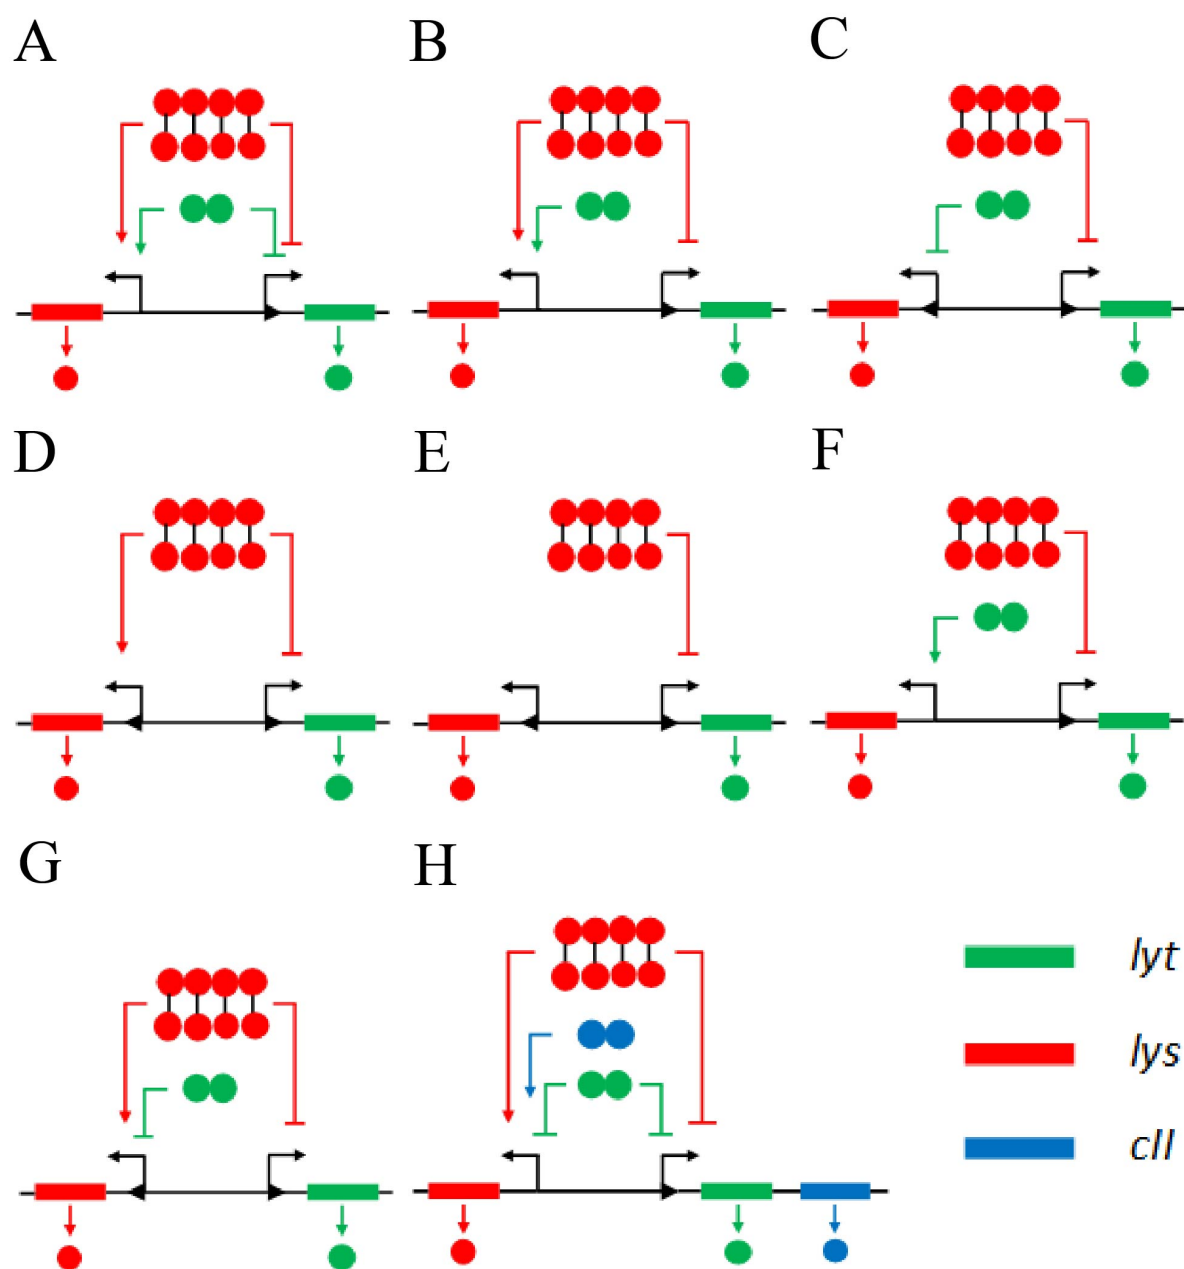

**Figure 1:** Various two-protein models, and three-protein model. (A) The minimalist model or 1A\_Lyt\_Lys. (B) Previous model with self-repression of *lyt* removed or 1B\_Lyt\_Lys. (C) Mutual repression or 2\_Lyt\_Lys. (D) 3\_Lyt\_Lys. (E) 4\_Lyt\_Lys. (F) 5\_Lyt\_Lys. (G) 6\_Lyt\_Lys. (H) Three-protein model which is very close to lambda's GRN or Lyt\_Lys\_CII. Lower arrowhead represents basal expression.

108 and transcribe *cIII* and *cII* genes, respectively. Such an RNAP from *pR* is also able to transcribe  
109 through another terminator, *tR2*, present upstream of gene *Q* (see Figure 2). Up to this point,  
110 the pathway for lytic and lysogeny are identical. Lytic pathway is chosen when the extended  
111 transcription from *pR* also causes gene *Q* to be transcribed. *Q*, being an anti-termination factor,  
112 causes transcription of *pR'* to not terminate, as it would otherwise do, at *tR'*, which is present  
113 at about 200 bases away from the beginning, thereby allowing transcription of the lytic genes  
114 downstream of *Q*. Once this happens, the cell is committed to lysis. CIII protein has an indirect  
115 role in establishing lysogeny. It prevents the degradation of CII by inhibiting bacterial protease  
116 HflB [5,6]. As the current paper focuses on the design principle of lysis/lysogeny switch, the  
117 (indirect) role of cIII will not be taken into consideration.

118 In lambda's GRN, *cII* and *Q* are under the control of promoter *pR*. Since in 1A\_Lyt\_Lys  
119 *lyt* is transcribed from *pR*, *Lyt* protein should be functionally equivalent to CII and *Q*. That  
120 is, on the whole, CII and *Q* should carry out three actions: activate transcription from *lys*,  
121 inhibit transcription from *lyt* gene, and engender lytic development. When CII accumulates  
122 in sufficient concentration, it activates transcription from three promoters: *pI*, *pRE*, and *pAQ*  
123 [10,11]. Promoter *pI* transcribes *int* gene, required for the integration of phage genome into  
124 that of the host bacterium. Transcript produced from *pRE* contains orf for *cI*; hence, activation  
125 of this promoter leads to production of CI. Thus, the action of CII on promoters *pI* and *pRE*  
126 is functionally equivalent to *Lyt* protein activating transcription of *lys*. Notably, while the role  
127 of Cro in lambda's GRN is to inhibit the expression of *lys*, Cro-like protein (*Lyt*) activates the  
128 expression of *lys* in the 1A\_Lyt\_Lys.

129 CII inhibits lytic development by activating transcription from *pAQ*, which is located  
130 within *Q* gene in the opposite polarity. The transcript, thus produced, being antisense to (a part  
131 of) *Q* mRNA hybridizes with the latter, thereby preventing the translation of *Q* m-RNA, which  
132 is essential for lytic development [2]. Thus, the action of CII on promoter *pAQ* is functionally  
133 equivalent to *Lyt* protein inhibiting transcription of its own gene. If CII is not produced in  
134 sufficient amount, *Q* m-RNA is translated and anti-terminator *Q*, thus produced, causes lysis.

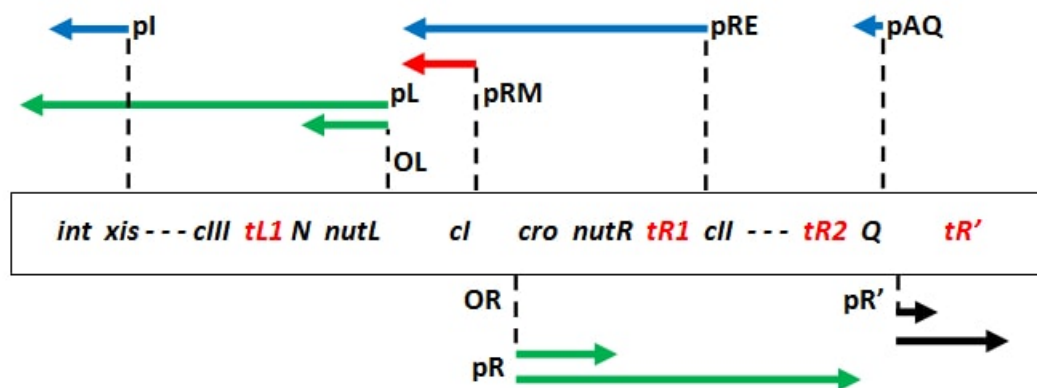

**Figure 2:** GRN and transcription map of lambda (adapted from Figure 1 of [8]). Transcripts that are produced earliest, viz. from *pL* and *pR* promoters, are depicted as green arrows. The late transcript, viz. from *pR'*, is a black arrow. Transcripts from CII-activated promoters, viz. *pI*, *pRE*, and *pAQ*, are shown as blue arrows. Transcript from *pRM*, which is activated by CI, is shown as red arrow. Transcription terminators, namely *tL1*, *tR1*, and *tR2*, are depicted in red.

## 135 Variants of 1A\_Lyt\_Lys and mutual repression model

136 In order to better demonstrate that the positive feedback underlies lysis/lysogeny switch, I  
137 considered variants of 1A\_Lyt\_Lys, mutual repression model, which doesn't have positive feedback  
138 loop, and its variants, and a model having the features of 1A\_Lyt\_Lys and mutual repression  
139 model. Since two features, viz. constitutive expression of *lys* and its inhibition by Lys, are  
140 common, they would not be mentioned in the description of the models below. Since *cI* gene  
141 is positively regulated in lambda's GRN, *lys* has to have either basal expression or be activated  
142 by Lyt. All of these models can be categorized in terms of three factors, as shown in the Table  
143 1. First column shows whether *lys* possesses basal expression or is activated by Lyt. Second  
144 column shows if positive feedback, constituted by transcriptional activation of *lys* by its own  
145 product, is present. Third column shows if inhibition of *lys* by Lyt is present. Inhibition of  
146 *lys* by Lyt can only be present when *lys* possesses basal expression. Thus, for *lys* having basal  
147 expression, there are four models; and where it gets activated by Lyt, there are two models.

149 **1B\_Lyt\_Lys:** This model differs from 1A\_Lyt\_Lys only in not having self-inhibition of Lyt. The  
150 inhibition of *lys*, required at MoI of 2, by its own product is dispensable, as Lys performs the



**Table 1:** Classification of additional two-protein models.

| Model      | Basal expression of <i>lys</i> /<br>Activation of <i>lys</i> by <i>Lyt</i> | Activation of <i>lys</i><br>by <i>Lys</i> | Inhibition of <i>lys</i><br>by <i>Lyt</i> |
|------------|----------------------------------------------------------------------------|-------------------------------------------|-------------------------------------------|
| 1B_Lyt_Lys | Activation                                                                 | Yes                                       | N/A                                       |
| 5_Lyt_Lys  | Activation                                                                 | No                                        | N/A                                       |
| 3_Lyt_Lys  | Basal                                                                      | Yes                                       | No                                        |
| 6_Lyt_Lys  | Basal                                                                      | Yes                                       | Yes                                       |
| 4_Lyt_Lys  | Basal                                                                      | No                                        | No                                        |
| 2_Lyt_Lys  | Basal                                                                      | No                                        | Yes                                       |

151 same function, and more so, because at MoI of 2 *Lyt*'s concentration is required to be much  
152 lower than that of *Lys* in order for switch to be of good quality. In terms of lambda's GRN, this  
153 would mean CI, instead of CII, activating transcription from *pAQ*.

$$\frac{dX}{dt} = \frac{mk_1(1 + \frac{X^a}{KD_1})}{1 + \frac{X^a}{KD_1} + \frac{Y^b}{KD_2}} - k_2X \quad (3)$$

$$\frac{dY}{dt} = \frac{m(k_3\frac{X^a}{KD_1} + k_4\frac{Y^b}{KD_2})}{1 + \frac{X^a}{KD_1} + \frac{Y^b}{KD_2}} - k_5Y \quad (4)$$

154 **2\_Lyt\_Lys** (Mutual repression): *Lyt* represses *lys*, which has basal expression.

$$\frac{dX}{dt} = \frac{mk_1(1 + \frac{X^a}{KD_1})}{1 + \frac{X^a}{KD_1} + \frac{Y^b}{KD_2}} - k_2X \quad (5)$$

$$\frac{dY}{dt} = \frac{mk_3(1 + \frac{Y^b}{KD_2})}{1 + \frac{X^a}{KD_1} + \frac{Y^b}{KD_2}} - k_5Y \quad (6)$$

155 **3\_Lyt\_Lys:** *lys* has basal expression and is activated by Lys cooperatively.

$$\frac{dX}{dt} = \frac{mk_1}{1 + \frac{Y^b}{K_{D2}}} - k_2X \quad (7)$$

$$\frac{dY}{dt} = \frac{m(k_3 + k_4 \frac{Y^b}{K_{D2}})}{1 + \frac{Y^b}{K_{D2}}} - k_5Y \quad (8)$$

156 **4\_Lyt\_Lys:** *lys* has basal expression.

$$\frac{dX}{dt} = \frac{mk_1}{1 + \frac{Y^b}{K_{D2}}} - k_2X \quad (9)$$

$$\frac{dY}{dt} = mk_3 - k_5Y \quad (10)$$

157 **5\_Lyt\_Lys:** *lys* is activated by Lyt.

$$\frac{dX}{dt} = \frac{mk_1(1 + \frac{X^a}{K_{D1}})}{1 + \frac{X^a}{K_{D1}} + \frac{Y^b}{K_{D2}}} - k_2X \quad (11)$$

$$\frac{dY}{dt} = \frac{mk_3 \frac{X^a}{K_{D1}}}{1 + \frac{X^a}{K_{D1}} + \frac{Y^b}{K_{D2}}} - k_5Y \quad (12)$$

158 **6\_Lyt\_Lys:** *lys* has basal expression, is activated by Lys, and inhibited by Lyt.

$$\frac{dX}{dt} = \frac{mk_1(1 + \frac{X^a}{K_{D1}})}{1 + \frac{X^a}{K_{D1}} + \frac{Y^b}{K_{D2}}} - k_2X \quad (13)$$

$$\frac{dY}{dt} = \frac{m(k_3 + k_4 \frac{Y^b}{K_{D2}})}{1 + \frac{X^a}{K_{D1}} + \frac{Y^b}{K_{D2}}} - k_5 Y \quad (14)$$

## 159 Deterministic simulation

160 Since Cro forms dimer, Hill coefficient for Lyt's binding is considered to be 2; whereas, since  
 161 CI forms tetramer, Hill coefficient for Lys' binding was taken to be 4. However, in the interest  
 162 of completeness, another set of Hill coefficients, viz. a=2, b=2, was also considered. The rate  
 163 constants and dissociation constants of equations defining a given model were searched (see  
 164 Methods) in two stages: order search and linear search (as they are called here). For a given  
 165 model and set of Hill coefficients (a and b), a set of rate constants and dissociation constants  
 166 would henceforth be referred to as a parameter set (That is, Hill coefficients are not a part of  
 167 parameter set). Parameter sets were selected on the basis of quality of switch, viz. switch  
 168 quotient (as it is called here), they generated. Switch quotient was initially considered to be  
 169 determined by the expression

$$SQ = \frac{(S_1 - S_2)}{S_1}$$

170  $S_1 = \min\{\text{Lyt at MoI of 1, Lys at MoI of 2}\}$

171  $S_2 = \max\{\text{Lys at MoI of 1, Lyt at MoI of 2}\}$

172 The expression, however, selected parameter sets which gave unequal equilibrium values of Lyt  
 173 at MoI of 1 and Lys at MoI of 2. From the perspective of simplicity, I believe that the difference  
 174 between the two should be minimal; therefore, the previous expression is multiplied by ratio of  
 175  $S_1$  to  $S_3$  in order to penalize the difference between  $S_3$  and  $S_1$ .

$$SQ = \frac{(S_1 - S_2)}{S_1} \cdot \frac{S_1}{S_3} = \frac{(S_1 - S_2)}{S_3}$$

176  $S_3 = \max\{\text{Lyt at MoI of 1, Lys at MoI of 2}\}$

177 This expression (like the older one) varies between 0 and 1. Only those parameter sets were

178 selected whose corresponding switch quotients (SQ) were positive.

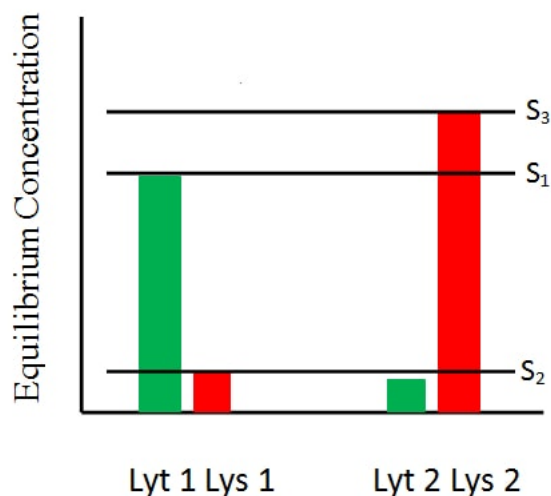

**Figure 3:** Schematic of switch's profile, viz. equilibrium concentrations of Lyt and Lys at the two MoIs.

179 As Table 2 shows, all of the models possessing the positive feedback loop have average  
180 SQ of more than 0.97 for both sets of Hill coefficients (lowest SQ among all the models in  
181 this category was 0.9270). Mutual repression model for Hill coefficients' set of  $a=2$ ,  $b=2$  have  
182 average SQ of 0.5283 (highest SQ was 0.6666); and, for that of  $a=2$ ,  $b=4$  all SQs were more  
183 than 0.9 except for one parameter set, whose SQ was 0.5. 4\_Lyt\_Lys for Hill coefficients' set  
184 of  $a=2$ ,  $b=2$  gives SQs of 0.4794 and 0.4707; and, for that of  $a=2$ ,  $b=4$  both SQs were almost  
185 0.5. Thus, if we exclude 2\_Lyt\_Lys for Hill coefficients' set of  $a=2$ ,  $b=4$  from the analysis, the  
186 lowest SQ among models with the positive feedback loop, viz. 1A\_Lyt\_Lys, 1A\_Lyt(1)\_Lys,  
187 1B\_Lyt\_Lys, 3\_Lyt\_Lys, and 6\_Lyt\_Lys, was much higher than the highest SQ among models  
188 without it, viz. 2\_Lyt\_Lys and 4\_Lyt\_Lys.

189 In the former set, Lys activating its own gene lets the value of Lys at MoI of 1 to be  
190 disproportionately lower for its desired particular value at MoI of 2. On the other hand,  
191 in 4\_Lyt\_Lys, since increase in genome copy number leads to proportional increase in the  
192 equilibrium activity of *lys*' promoter, value of Lys at MoI of 1 would be half its value at MoI of  
193 2. However, mutual repression model does generate many parameter sets with SQ greater than

**Table 2:** Average and SD of SQs under deterministic and stochastic conditions for various thresholds of stochastic success rate.

| Model             | Deterministic AVG SQ |                    | Deterministic AVG SQ    |                    | Stochastic AVG SQ |                    |
|-------------------|----------------------|--------------------|-------------------------|--------------------|-------------------|--------------------|
|                   | (SD)                 |                    | (SD)                    |                    | (SD)              |                    |
|                   |                      |                    | (SSR <sup>a</sup> ≥ 95) |                    | (SSR ≥ 95)        |                    |
|                   | a=2, b=2             | a=2, b=4           | a=2, b=2                | a=2, b=4           | a=2, b=2          | a=2, b=4           |
| 1A_Lyt_Lys        | 0.9917<br>(0.0106)   | 0.9896<br>(0.0049) | 0.9898<br>(N/A)         | 0.9905<br>(0.0043) | 0.7997<br>(N/A)   | 0.6204<br>(0.0624) |
| 1A_Lyt(1)_Lys     | 0.9950<br>(0.0053)   | 0.9923<br>(0.0045) | none                    | none               | none              | none               |
| 1B_Lyt_Lys        | 0.9806<br>(0.0236)   | 0.9769<br>(0.0277) | 0.9971<br>(N/A)         | 0.9270<br>(N/A)    | 0.7995<br>(N/A)   | 0.7679<br>(N/A)    |
| 2_Lyt_Lys         | 0.5283<br>(0.0696)   | 0.8917<br>(0.1766) | none                    | 0.5001<br>(N/A)    | none              | 0.2725<br>(N/A)    |
| 3_Lyt_Lys         | 0.9938<br>(0.0078)   | 0.9873<br>(0.0157) | none                    | none               | none              | none               |
| 4_Lyt_Lys         | 0.4751<br>(0.0043)   | 0.4956<br>(0.0006) | none                    | 0.4956<br>(0.0006) | none              | 0.2983<br>(0.0102) |
| 6_Lyt_Lys         | 0.9988<br>(0.0004)   | 0.9876<br>(0.0135) | none                    | none               | none              | none               |
| Lyt_Lys_CII       | 0.9855<br>(0.0155)   | N/A                | 0.9573<br>(N/A)         | N/A                | 0.7526<br>(N/A)   | N/A                |
| Lyt_Lys_CII(1)    | 0.9801<br>(0.0151)   | N/A                | 0.9718<br>(N/A)         | N/A                | 0.7595<br>(N/A)   | N/A                |
| Lyt(1)_Lys_CII(1) | 0.9894<br>(0.0134)   | N/A                | none                    | N/A                | none              | N/A                |

<sup>a</sup> SSR = Stochastic Success Rate

0.9 for Hill coefficients' set of  $a=2$ ,  $b=4$ . Since this model exhibits very different behaviour in the stochastic simulations, it will be discussed further in the section for stochastic simulations.

The model 5\_Lyt\_Lys did not generate any parameter set. The reason is that in the absence of the positive feedback loop, *lyt* needs to have strong basal expression in order to sustain high concentration of Lys, whose gene is activated by Lyt, at MoI of 2. Equivalently, the desired high concentration of Lyt at MoI of 1, also leads to excessive production of Lys at the same MoI. Thus, both proteins are present in similar amounts at both MoIs. In hindsight, one notes that the equations for Lyt and Lys are almost identical for this model.

In order to examine the significance of cooperativity in positive feedback here, another set of Hill coefficients, viz.  $a=2$ ,  $b=1$ , was also considered for 1A\_Lyt\_Lys. However, parameter sets generated by this set gave SQs which were almost equal to zero. For models having the positive feedback loop, average SQ of parameter sets was very slightly, almost negligibly, greater for Hill coefficients' set of  $a=2$ ,  $b=2$  than that for set of  $a=2$ ,  $b=4$ .

## Closer to lambda's GRN: the three-protein model

In order to further verify if 1A\_Lyt\_Lys represents reduced form of lambda's GRN, I consider a three-protein model which is very close to lambda's GRN and show that it is equivalent to a two-protein model possessing the positive feedback loop: 1B\_Lyt\_Lys. A CII-like protein is added to 1A\_Lyt\_Lys beside extending the role of Lyt. Since genes *lyt* and *cII* are under the control of same promoter, in order to allow for potentially different rates of translation of their corresponding cistrons during stochastic simulations, their mRNAs are considered explicitly. The role of Lyt in this model is identical to that of Cro in lambda phage's GRN. That is, now Lyt represses transcription of *lys*, in addition to repressing that of its own gene. The role of CII in the three-protein model is to activate transcription of *lys*. This corresponds to CII's activation of *pRE* promoter, leading to synthesis of mRNA which contains orf for *cI*. The three-protein model considered here is different from that in [7], in which CII activates transcription of *cI* from a distinct (*pRE*) promoter. Since in the three-protein model, CII has

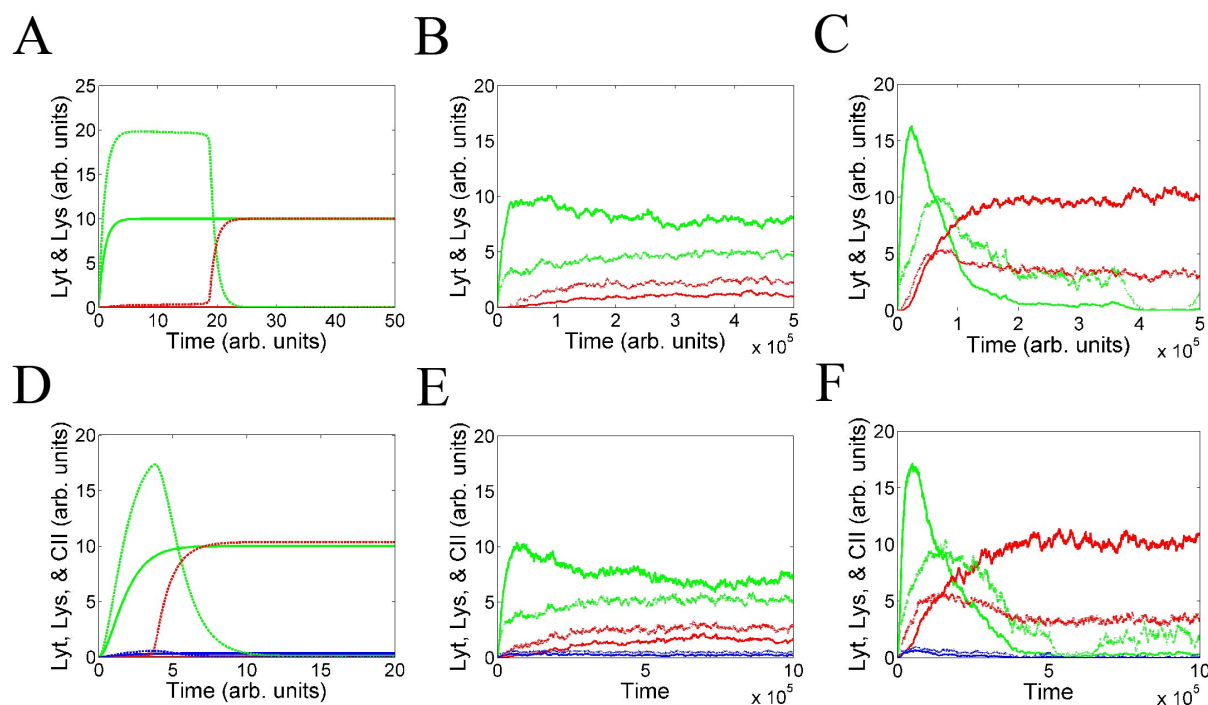

**Figure 4:** Deterministic and stochastic simulations of the minimalist two-protein model (1A\_Lyt\_Lys) and three-protein model (Lyt\_Lys\_CII). Lyt, Lys, and CII are represented by green, red, and blue, respectively. For deterministic simulations, concentrations of proteins at MoI of 1 and 2 are depicted by solid curve and dashed curve, respectively. For stochastic simulations, solid curve and dotted curve, respectively, represent average and standard deviation of number of protein molecules from 500 simulations. For a given model, the parameter set which had maximum stochastic success rate was used for simulation. The stochastic simulation trajectories shown here are qualitatively similar to those of all other models for parameter sets with high stochastic success rate; whereas, the deterministic simulation trajectories were so, irrespective of stochastic success rate. In stochastic simulation graphs, the original abscissa, which had unequally spaced time intervals, was converted to one with equally spaced time intervals. Each (arb.) unit of abscissa was divided into 10000 intervals. For the tiny fraction of intervals which still contained more than one event, their last events were defined to be their only events. (A) Deterministic simulations of 1A\_Lyt\_Lys. At MoI of 2, initially, the concentration of Lyt becomes more than its equilibrium concentration at MoI of 1 but then comes back to very low level. It is due to double initial rate of production of Lyt at MoI of 2 as compared to that at MoI of 1; however, as Lyt's concentration increases, *lys*' transcription becomes stronger, leading to production of Lys, which in turn represses *lyt*. (B-C) Stochastic simulations of 1A\_Lyt\_Lys for MoI of 1 and 2, respectively. (D) Deterministic simulations of Lyt\_Lys\_CII. At MoI of 2, initially, concentrations of Lyt and CII become more than their respective equilibrium concentrations at MoI of 1 but then come back to very low levels. This was also observed for a three-protein model, which is very similar to that of this paper, in a theoretical study [7]. Analogous to the two-protein model, it's due to heightened initial rate of production of CII at MoI of 2 as compared to that at MoI of 1; however, as CII's concentration increases, transcription of *lys* becomes stronger, leading to production of Lys, which represses *lyt* and *cI*. (E-F) Stochastic simulations of Lyt\_Lys\_CII for MoI of 1 and 2, respectively. Bell-shaped curve for CII at MoI of 6 was reported by an experimental study [2].

to compete with *Lyt*, which represses transcription of *lys*, for binding to the intergenic region, the demonstration of equivalence of the three-protein model (*Lyt*\_*Lys*\_*CII*) with 1A\_*Lyt*\_*Lys*, or any of its variants, gets more challenging. The degradation constants for  $xz$  (concentration of *lys-cII* mRNA),  $X$  (concentration of *Lyt*),  $Z$  (concentration of *CII*), and  $Y$  (concentration of *Lys*), viz.  $k_6, k_7, k_9, k_8$ , respectively, are taken to be unity for the same reason why degradation constants for two-protein models were set equal to 1. Since for 1A\_*Lyt*\_*Lys* SQs generated by Hill coefficients' set of  $a=2, b=2$  were as high as SQs generated by that of  $a=2, b=4$ , applying occam's razor, Hill coefficients for binding of *Lyt* and *Lys* are taken to be 2 and 2, respectively, not 2 and 4. Further, taking lead from here, Hill coefficient for *CII*'s binding is considered to be 2, even though it has been shown to exist as tetramer in solution [14] and in crystallized free and DNA-bound state [15].

Model equations for three-protein model are as follows.

233

234

Transcription of *lys-cII* genes:

$$\frac{dxz}{dt} = \frac{mk_1(1 + \frac{Z^c}{K_{D3}})}{1 + \frac{X^a}{K_{D1}} + \frac{Y^b}{K_{D2}} + \frac{Z^c}{K_{D3}}} - k_6xz \quad (15)$$

Translation of *lys*:

$$\frac{dX}{dt} = k_2xz - k_7X \quad (16)$$

Translation of *cII*:

$$\frac{dZ}{dt} = k_4xz - k_9Z \quad (17)$$

Production of *Lys*:

$$\frac{dY}{dt} = \frac{m(k_5\frac{Y^b}{K_{D2}} + k_3\frac{Z^c}{K_{D3}})}{1 + \frac{X^a}{K_{D1}} + \frac{Y^b}{K_{D2}} + \frac{Z^c}{K_{D3}}} - k_8Y \quad (18)$$

where,  $c$  is the Hill coefficient of *CII*'s binding,  $k_1$  is basal expression rate of *lys-cII* genes,  $K_{D3}$  is the "combined" dissociation constant of *CII* (see Methods),  $k_2$  and  $k_4$  are translation rates of *lys* and *cII*, respectively.  $k_5$  and  $k_3$  are rate constants for transcriptional activation of *lys* by *Lys* and *CII*, respectively.



243 Equilibrium values of  $xz$ ,  $X$ ,  $Z$ , and  $Y$  are

$$k_6 \bar{xz} = \frac{mk_1(1 + \frac{\bar{Z}^a}{K_{D3}})}{1 + \frac{\bar{X}^a}{K_{D1}} + \frac{\bar{Y}^b}{K_{D2}} + \frac{\bar{Z}^a}{K_{D3}}} \quad (19)$$

$$k_7 \bar{X} = k_2 \bar{xz} \quad (20)$$

$$k_9 \bar{Z} = k_4 \bar{xz} \quad (21)$$

$$k_8 \bar{Y} = \frac{m(k_5 \frac{\bar{Y}^b}{K_{D2}} + k_3 \frac{\bar{Z}^a}{K_{D3}})}{1 + \frac{\bar{X}^a}{K_{D1}} + \frac{\bar{Y}^b}{K_{D2}} + \frac{\bar{Z}^a}{K_{D3}}} \quad (22)$$

244 From (20) and (21), it can be seen that equilibrium value of CII is in constant proportion to that  
245 of Lyt. Hence, CII can be written in terms of Lyt

$$\bar{Z} = p \bar{X} \quad (23)$$

246 where

$$p = \frac{k_4 k_7}{k_2 k_9}$$

247 Using (20) and (23), (19) and (22) can be written as

$$\bar{X} = \frac{m \frac{k_1 k_2}{k_6 k_7} (1 + \frac{(p \bar{X})^a}{K_{D3}})}{1 + \bar{X}^a (\frac{1}{K_{D1}} + \frac{p^a}{K_{D3}}) + \frac{\bar{Y}^b}{K_{D2}}} \quad (24)$$

$$\bar{Y} = \frac{m \frac{1}{k_8} (k_5 \frac{\bar{Y}^b}{K_{D2}} + k_3 \frac{(p\bar{X})^a}{K_{D3}})}{1 + \bar{X}^a (\frac{1}{K_{D1}} + \frac{p^a}{K_{D3}}) + \frac{\bar{Y}^b}{K_{D2}}} \quad (25)$$

248 The equivalence of equations (24) and (25) to the defining equations of 1B\_Lyt\_Lys which  
 249 have reached equilibrium validates two-protein model. Two-protein model being sufficient for  
 250 producing lysis/lysogeny switch constitutes an argument that *cro* in lambda's GRN is expendable.  
 251 Mathematically, the reason for Cro being expendable lies in its equilibrium concentration being  
 252 proportional to that of CII.

253 Kobiler et al. [2] showed that infection with lambda lacking *cro* gene ( $\lambda\text{cro}^-$ ) leads to  
 254 production of CII to level sufficient to cause lysogeny even at MoI of 1. This, however, does  
 255 not mean that Cro, per se, is required to engender lytic development. Cro represses *pL* and  
 256 *pR* by fourfold and twofold, respectively [12]. Thus, the absence of Cro increases the level  
 257 of CII in two ways: first, by allowing transcription of *cII*, which is under the control of *pR*,  
 258 and *cIII*, which is under the control of *pL* and whose product prevents degradation of CII by  
 259 protease HflB. In the wild type strain, parameters associated with transcription rates of *cII* and  
 260 *cIII*, translation and degradation rates of their respective mRNAs, and degradation rates of CII  
 261 and CIII are such that enough CII is produced, despite Cro's repression of *pL* and *pR*, at higher  
 262 MoIs so as to sufficiently activate *pRE* promoter, leading to production of CI to level which  
 263 is enough to cause lysogeny. However, when *cro* is deleted, CI produced even at MoI of 1 is  
 264 enough to engender lysogeny. With appropriate changes in the aforementioned parameters, it  
 265 would be possible to model  $\lambda\text{cro}^-$  strain which behaves like its wild type counterpart.

266 As stated above, there are experimental evidences for CII present as tetramer in solution  
 267 [14] and in crystallized free and DNA-bound state [15]. Additionally, as Figure 4 in [10] shows,  
 268 the binding curve of CII to *pAQ* has appreciable lag phase, indicating that it binds as a multimer.  
 269 However, Figure 2c in [2] shows that curve of *pRE*'s activity with respect to CII levels is not  
 270 sigmoidal as expected from multimeric binding, but hyperbolic as seen in monomeric binding.  
 271 Therefore, another model was considered where the Hill coefficient for CII binding was taken to

272 be 1 (Lyt\_Lys\_CII(1)). Additionally, one more model was considered where the Hill coefficient  
 273 for Lyt too was taken to be 1 (Lyt(1)\_Lys\_CII(1)). This made the current author go back to  
 274 two-protein models and consider 1A\_Lyt\_Lys model too with Hill coefficients' set of  $a=1$ ,  $b=2$   
 275 and  $a=1$ ,  $b=4$ , named 1A\_Lyt(1)\_Lys. SQs generated by all new variants were similar in values  
 276 to those generated from their counterparts, where the Hill coefficient of either Lyt or CII, or  
 277 both, were taken to be 2. Specifically, for 1A\_Lyt(1)\_Lys all SQs were more than 0.98 for both  
 278 sets of Hill coefficients. For all of the three protein models, all SQs were greater than 0.95. Just  
 279 like the Hill coefficients' set of  $a=2$ ,  $b=1$ , parameter sets generated by the set of  $a=1$ ,  $b=1$  gave  
 280 SQs which were almost equal to zero.  
 281

## 282 **Stochastic simulation**

283 Since gene expression is stochastic [17,18], the true validity of results obtained in the deterministic  
 284 simulations lie in their being replicated in the stochastic simulations. Thus, stochastic simulations  
 285 were performed, using Gillespie algorithm [19], for parameter sets obtained in the deterministic  
 286 simulations.

287 For both two-protein and three-protein models, for any given parameter set, SQ generated  
 288 in the stochastic simulation, or stochastic switch quotient (SSQ), was less than its deterministic  
 289 counterpart, or deterministic switch quotient (DSQ). No parameter set was able to produce  
 290 switch in every run during stochastic simulation. That is because either the SSQ was negative  
 291 ( $S_1 < S_2$ ) or, rarely,  $S_3$  was zero. Percentage of runs that produce finite, positive SQs during  
 292 stochastic simulation for a given parameter set and set of Hill coefficients would henceforth be  
 293 referred to as stochastic success rate.

294 An interesting property was observed for mutual repression model for Hill coefficients' set  
 295 of  $a=2$ ,  $b=4$ . It was the only set of Hill coefficients for any model lacking the positive feedback  
 296 that produced a DSQ more than 0.9 (highest SQ for the same model for Hill coefficients' set of  
 297  $a=2$ ,  $b=2$  was 0.6666). As aforementioned, all of the parameter sets for Hill coefficients' set of  
 298  $a=2$ ,  $b=4$  produced DSQ of more than 0.9 except one, whose DSQ was 0.5. Notably, this is the

**Table 3:** Number of parameter sets for various ranges of stochastic success rate.

| Model             | SSR <sup>a</sup> ≥ 95 |     | 95 > SSR ≥ 90 |     | 90 > SSR ≥ 80 |     | Total no. of parameter sets |     |
|-------------------|-----------------------|-----|---------------|-----|---------------|-----|-----------------------------|-----|
|                   | a=2                   | a=2 | a=2           | a=2 | a=2           | a=2 | a=2                         | a=2 |
|                   | b=2                   | b=4 | b=2           | b=4 | b=2           | b=4 | b=2                         | b=4 |
| 1A_Lyt_Lys        | 1                     | 4   | 5             | 3   | 10            | 3   | 21                          | 17  |
| 1A_Lyt(1)_Lys     | 0                     | 0   | 1             | 1   | 3             | 9   | 17                          | 15  |
| 1B_Lyt_Lys        | 1                     | 1   | 1             | 5   | 2             | 2   | 11                          | 11  |
| 2_Lyt_Lys         | 0                     | 1   | 0             | 0   | 0             | 0   | 6                           | 6   |
| 3_Lyt_Lys         | 0                     | 0   | 0             | 0   | 1             | 4   | 8                           | 10  |
| 4_Lyt_Lys         | 0                     | 2   | 0             | 0   | 0             | 0   | 2                           | 2   |
| 6_Lyt_Lys         | 0                     | 0   | 0             | 0   | 0             | 0   | 12                          | 12  |
| Lyt_Lys_CII       | 1                     | N/A | 2             | N/A | 1             | N/A | 9                           | N/A |
| Lyt_Lys_CII(1)    | 1                     | N/A | 1             | N/A | 5             | N/A | 9                           | N/A |
| Lyt(1)_Lys_CII(1) | 0                     | N/A | 1             | N/A | 1             | N/A | 9                           | N/A |

<sup>a</sup> SSR = Stochastic Success Rate

parameter set which had very high stochastic success rate, viz. that of 97%; while, maximum stochastic success rate among other parameter sets was 50%. This peculiar result for mutual repression has been reported earlier also.

Avlund et al. showed that various two-protein models, based upon mutual repression model, which were able to produce switch in a noise-less environment, did not function when noise was introduced [9]. However, additional CII-like protein conferred robustness to noise in 8% of the parameter sets that produced switch deterministically. The different behaviour of mutual repression model in deterministic simulations with respect to stochastic simulations warrants theoretical investigation. Notably, one of their rare two-protein models (i.e., b of Figure 2) which did produce switch even in the presence of noise (though with much lower success as compared to their three-protein models) is model 6\_Lyt\_Lys in the current paper.

Thus, taking into account the stochastic success rate of at least 95%, two-protein models can be divided into two sets based upon DSQs or SSQs. One set comprises of two models with the positive feedback loop, viz. 1A\_Lyt\_Lys and 1B\_Lyt\_Lys, and another without it, viz. 2\_Lyt\_Lys and 4\_Lyt\_Lys. The one with the positive feedback loop has appreciably higher DSQs and SSQs than the one without it.

However, for the same stochastic success rate cut-off, the lowest SSQ among parameter

sets with Hill coefficients' set of  $a=2$ ,  $b=2$  was greater than the highest SSQ among those with Hill coefficients' set of  $a=2$ ,  $b=4$ , for any given model (data not shown). This trend gets confirmed if one considered more parameter sets, viz. by relaxing the cut-off of stochastic success rate from 95% to 90%. The relaxation lets the inclusion of 1A\_Lyt(1)\_Lys in the analysis. This result is against one's expectation: since Lys activating transcription of its own gene in a cooperative manner is crux of the switch, increasing Hill coefficient of Lys should have, if at all, increased the SSQ. This comparison could not be made in models without the positive feedback loop because none of their parameter sets with Hill coefficients' set of  $a=2$ ,  $b=2$  had stochastic success rate of at least 90%.

**Table 4:** Maximum stochastic success rate.

| Model             | Hill coefficients' set | Maximum stochastic success rate |
|-------------------|------------------------|---------------------------------|
| 1A_Lyt_Lys        | $a=2$ , $b=4$          | 96.8                            |
| 1A_Lyt(1)_Lys     | $a=1$ , $b=2$          | 91                              |
| 1B_Lyt_Lys        | $a=2$ , $b=4$          | 97.2                            |
| 2_Lyt_Lys         | $a=2$ , $b=4$          | 97                              |
| 3_Lyt_Lys         | $a=2$ , $b=4$          | 87                              |
| 4_Lyt_Lys         | $a=2$ , $b=4$          | 98.8                            |
| 6_Lyt_Lys         | $a=2$ , $b=4$          | 73                              |
| Lyt_Lys_CII       | $a=2$ , $b=2$ , $c=2$  | 95.5                            |
| Lyt_Lys_CII(1)    | $a=2$ , $b=2$ , $c=1$  | 97                              |
| Lyt(1)_Lys_CII(1) | $a=1$ , $b=2$ , $c=1$  | 93.5                            |

## Bistability at MoI of 1 and lysogen stability

In this study, parameter sets were searched for their ability to cause lysis at MoI of 1 and lysogeny at MoI of 2. However, if only one of the phage genomes gets integrated into the bacterial chromosome, it would not be able to maintain lysogeny, and lysis would ensue, if only one stable state existed at MoI of 1. In the deterministic simulations, all of the two-protein models possessing the positive feedback exhibited bistability at MoI of 1 for all of the parameter sets, except one (for 1B\_Lyt\_Lys). In the other stable state, the concentration of Lyt is almost

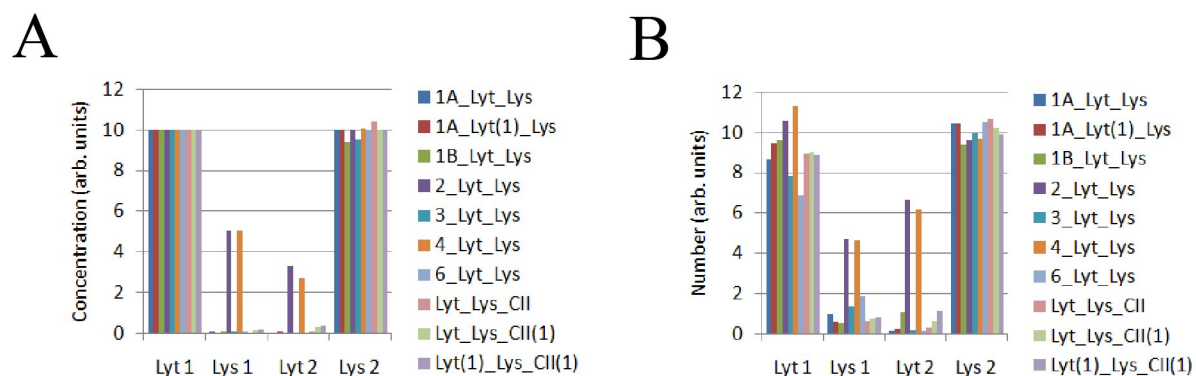

**Figure 5:** Equilibrium values correspond to those parameter sets which gave maximum stochastic success rate for their respective models (see Table 4). (A) Deterministic simulations. (B) Stochastic simulations. Note how the values of Lys at MoI of 1 and Lyt at MoI of 2 for 2\_Lyt\_Lys and 4\_Lyt\_Lys are much higher than those of the any other model.

zero and that of Lys is about half of its concentration at MoI of 2. Arguably, in lambda's system, the level of Lys in the second stable state would be high enough to maintain lysogeny.

For 4\_Lyt\_Lys, none of the parameter sets produced bistability at MoI of 1. For 2\_Lyt\_Lys, for Hill coefficients set of  $a=2$ ,  $b=2$  one parameter set generated bistability at MoI of 1, but its stochastic success rate was just 7.6% (Bistability exists for two more parameter sets, but their second stable states are at very high values of Lyt ( $>50$ ) and very low values of Lys ( $<2$ ); hence, inconsequential for lysogeny maintenance, and in any case, never reached by the phase point). For Hill coefficients set of  $a=2$ ,  $b=4$ , the only parameter set which did not exhibit bistability at MoI of 1 had stochastic success rate of 97%, while maximum stochastic success rate among other parameter sets was 50% (as aforementioned in the section for stochastic simulations). All of the three-protein models exhibited bistability at MoI of 1. The Lyt and Lys values of second stable states at MoI of 1 in three-protein models are about same as those of second stable states in two-protein models at the said MoI.

DNA between OL and OR sites forms a loop that has been shown to be important for the stable maintenance of lysogeny [12]. The loop forms due to interaction between CI dimers bound at OL1 and OL2 with those bound at OR1 and OR2 [13]. Therefore, the contribution of OL-CI-OR complex to production of CI would be represented by adding a term proportional to  $[CI]^8$ , raised to the power 8, to numerator and denominator. Since bistability at MoI of 1 in the

two-protein models is the consequence of *lys*' transcription getting activated by its own product in a cooperative manner (i.e., by the binding of Lys dimer), in lambda's GRN, activation of *cI*'s promoter present in a looped DNA, stabilized by CI octamer, would either generate bistability or contribute to already existing bistability due to two CI dimers activating the transcription of *cI*. Thus, it is reasonable to propose that the role of OL-CI-OR loop formation is to produce or strengthen bistability at MoI of 1. This argument becomes stronger in the light of the finding that looping also activates transcription from *pRM* by allowing the  $\alpha$ -CTD of RNAP bound at *pRM* to contact UP element at OL [16]. In the stochastic simulations, however, none of the two-protein and three-protein models produced bistability at MoI of 1.

At MoI of 2, only two models, viz. 2\_Lyt\_Lys and 6\_Lyt\_Lys, show bistability for about 80% and 60%, respectively, of the parameter sets. Notably, only these two models have Lyt repressing the transcription of *lys*. Since at the second stable state the concentration of Lyt is very high and that of Lys is very low, a parameter set would not, if at all, generate switch with high DSQ if its phase point reached this stable fixed point. Hence, bistability at MoI of 2 is inconsequential.

366

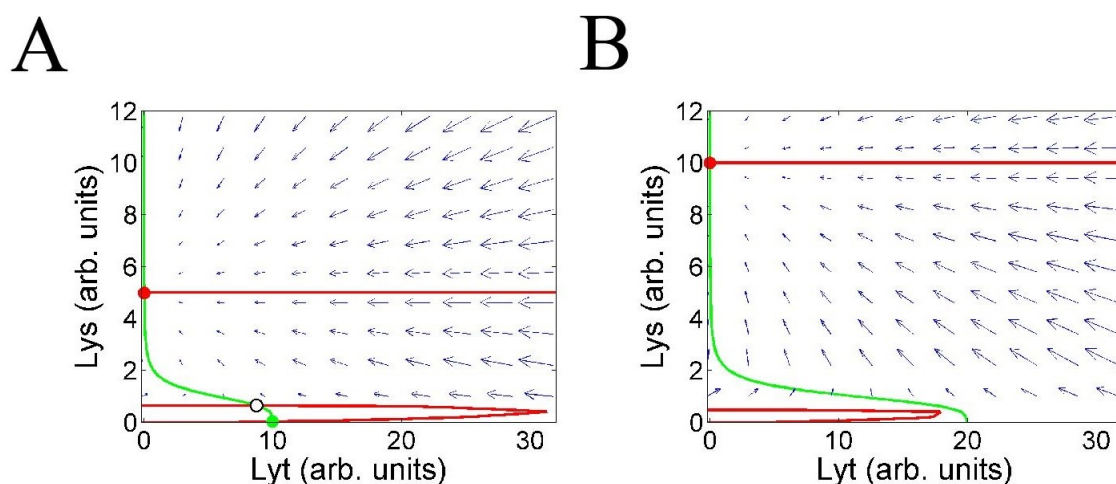

**Figure 6:** (A-B)Phase diagram of 1A\_Lyt\_Lys corresponding to the parameter set that gave maximum stochastic success rate, at MoI of 1 and 2. Green and red full circles are stable fixed points, whereas empty black circle is unstable fixed point. Green stable point is where system reaches when a single phage infects a bacterium. Red stable point is where system reaches when lysogeny is established by two phages, but only one of them gets integrated into the host's genome.



## Why positive feedback?

There can be two reasons why lysis/lysogeny switch is based upon the positive feedback: 1) biological properties of the switch, viz. a) highest switch quotient and presence of bistability at MoI of 1, and 2) quickest evolution of such a model. It should be noted, however, that speed of evolution would not matter if evolution is path-independent. That is, it's possible that nature initially evolves a sub-optimal design but which, given enough time, gets superseded by an optimal one.

Switch quotient: As mentioned in the previous sections, SQs generated in the deterministic and the stochastic simulations, respectively, for models possessing the positive feedback are much greater than those of the models lacking positive feedback.

Bistability at MoI of 1: As stated in the last section, for models not possessing the positive feedback loop, no parameter set, if at all, having sufficiently good stochastic success rate generated bistability. If one ignores the possibility of any other mechanism generating bistability, such as the formation of OL-CI-OR complex, this reason alone is sufficient for nature to choose models which possess the positive feedback loop over those which do not.

Speed of evolution: Even though the maximum stochastic success rate is very low for 3\_Lyt\_Lys and (especially) 6\_Lyt\_Lys, they are still compared with 4\_Lyt\_Lys and 2\_Lyt\_Lys, respectively, as these two are the only pairs within which mathematical comparison with regard to the positive feedback loop is possible. 2\_Lyt\_Lys and 4\_Lyt\_Lys differ from 6\_Lyt\_Lys and 3\_Lyt\_Lys, respectively, only in not having the positive feedback loop. Thus, model equations of former two models differ from those of latter two only in the dynamics of Lys. In models with the positive feedback loop, the term representing binding of Lys to the intergenic region (i.e.,  $Y^b/K_{D2}$ ) is multiplied by rate constant for transcriptional activation of *lys* by Lys,  $k_4$ . On the other hand, in models without the positive feedback loop  $Y^b/K_{D2}$  is multiplied by  $k_3$ , the basal expression rate of *lys*. Thus, 2\_Lyt\_Lys and 4\_Lyt\_Lys can be thought of as being equivalent to 6\_Lyt\_Lys and 3\_Lyt\_Lys, respectively, whose  $k_4$  is equal to  $k_3$ . That is, the former two models are those latter two models, respectively, whose rate constant for transcriptional activation of



394 *lys* by Lys is equal to the basal expression rate of *lys*. This constrain of having  $k_3 = k_4$  reduces  
 395 the potential parameter space for 2\_Lyt\_Lys and 4\_Lyt\_Lys by one dimension. Hence, the two  
 396 parameters being independent in 3\_Lyt\_Lys and 6\_Lyt\_Lys makes nature more likely to discover  
 397 them. This explains why 2\_Lyt\_Lys (11, 11) and 4\_Lyt\_Lys (2, 2) produced fewer parameter sets  
 398 than 6\_Lyt\_Lys (16, 16) and 3\_Lyt\_Lys (11, 13), respectively, for both sets of Hill coefficients  
 399 during the order search (as shown in the parenthesis).

400 Now, qualitative equivalence of 3\_Lyt\_Lys and 6\_Lyt\_Lys with 1B\_Lyt\_Lys, which is equivalent  
 401 to 1A\_Lyt\_Lys, is shown. 1B\_Lyt\_Lys is qualitatively equivalent to 3\_Lyt\_Lys for the reason that  
 402 in the former, transcriptional activation of *lys*' is achieved by binding of Lyt to its promoter;  
 403 whereas, in the latter, *lys* possesses basal expression. 6\_Lyt\_Lys differs from 3\_Lyt\_Lys in  
 404 having Lyt as a repressor of *lys*. This interaction is expendable, as at MoI of 2, concentration of  
 405 Lyt is anyway very low, and qualitatively speaking, at MoI of 1 repression of *lys* by Lyt can be  
 406 compensated by reducing basal expression of *lys*. For a given set of Hill coefficients, average  $k_3$   
 407 is at least a few times higher for 6\_Lyt\_Lys as compared to that for 3\_Lyt\_Lys (data not shown).

408

## 409 Methods

### 410 Derivation of model equations

411 The model, using the fact that binding of protein to itself or DNA is a much quicker process than  
412 transcription and translation, assumes quick equilibration for the processes of protein binding  
413 to itself or DNA, in order to calculate the "combined" dissociation constants of proteins. In the  
414 expressions below, P, X, and Y are promoter, Lys, and Lyt, respectively.

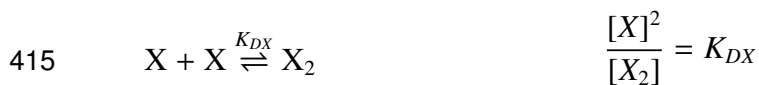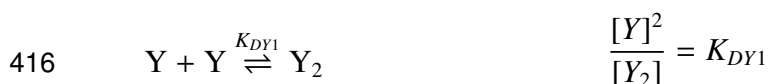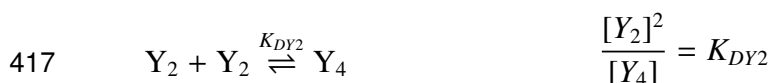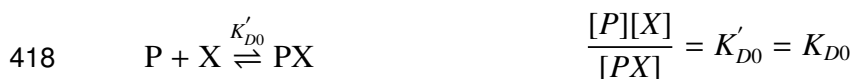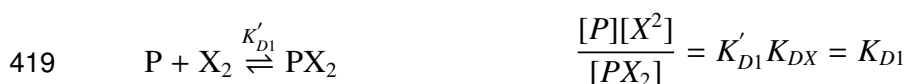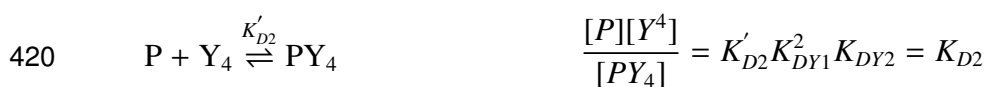

421 Above expressions for concentrations of promoter-protein complexes are for cases where a) Lyt  
422 binds as monomer, b) Lyt binds as dimer, and c) Lys binds as tetramer. They exhaust all other  
423 cases, viz. monomeric and dimeric Lys, and monomeric and dimeric CII.

424 Processes of transcription and translation are not considered explicitly except for *lyt-CII*

genes in the three-protein models. Hence, the model equations describe concentrations of proteins only. With expressions for concentrations of promoter-protein complexes, one can write generalized form of term representing protein production.

$$\frac{b + \sum_i k_i [DNA - Prot_i]}{[Unbound DNA] + \sum_i k_i [DNA - Prot_i]}$$

where  $b$  is, in case present, basal expression and  $k_i$  is rate constant for transcriptional activation by  $i_{th}$  protein.

Parameter sets, viz. rate constants and dissociation constants, of model equations were searched deterministically in two stages, viz. order search and linear search (as they are named here). In the order search, rate constants and dissociation constants were searched as 3's exponent, which was varied between -5 and 5 with the difference of 1, in a nested fashion. Thus, the number of parameter sets searched was equal to the number of parameters raised to the power 11. Notably, switch quotients generated by this approach are unrefined because rate constants and dissociation constants were increased geometrically, thereby causing a lot of intervening values to remain unsampled. Therefore, parameter sets generated from order search were further refined by linear search, which searches the neighbourhood of parameter set arithmetically. It was noted that parameter sets, generated in the order search, whose SQs were too close to each other (identical up to at least two decimal places) were either rescaled form of each other, or differed in those parameters to which SQ was resilient up to a certain range. Thus, in order to remove redundancy and in the interest of time, for linear search, the parameter sets were taken in such a way that the difference between consecutive SQs is at least 0.01.

Parameter sets, and thus accompanied SQs, generated through order search were refined by linear search in the following way. The value of each parameter (say,  $V$ ) of a set was varied between  $-3*V/5$  and  $3*V/5$  with the increment of  $V/5$ , in a nested fashion. Thus, the number of parameter sets searched was equal to the number of parameters raised to the power 7. However, for three-protein model, which had eight parameters, in the interest of saving time,

each parameter was varied between  $-2 \cdot V/5$  and  $2 \cdot V/5$  with the increment of  $V/5$ , in a nested fashion. Search was ended if the latest SQ was either lower than the previous one (which never happened) or if  $((\text{latest SQ} - \text{previous SQ})/\text{previous SQ})$  was less than 0.01. Again, in the interest of saving time, for three-protein model, the search was ended if the SQ at the end of the last iteration was more than or equal to 0.95. It should be noted that linear search is path dependent: it may happen that a path which initially yields lower SQs leads to higher SQ in the end than a path which initially yields higher SQs, and thus, treaded by the search. For both order and linear search and for all of the models, in order to expedite search, those parameter sets were rejected whose accompanying SQ was lower than the SQ of the previous parameter set. The values of the parameters were normalized such that the Lyt's equilibrium concentration was 10 arb. units. This was done for two purposes: a) to ensure that lowest values of Lyt at MoI of 1 and Lys at MoI of 2 never drop to zero in the stochastic simulations; b) in order to make comparison of parameter sets and equilibrium values of proteins visually easier. For both order and linear search, simulations were carried for time 100 arb. units. Thus, there was a possibility of a system of equations, defining a particular model, not reaching equilibrium in 100 arb. units for a given parameter set. In order to eliminate such parameter sets, simulations were done for  $10^5$  arb. units. Only few parameter sets had not reached equilibrium, and all of such parameter sets produced negative SQ. In order to calculate stochastic switch quotient, levels of proteins were averaged between 100 and 200 arb. units. The transient kinetics, viz. initial rise and plateauing at MoI of 1 and bell-shaped trajectory MoI 2, were completed at most by 50 arb. units.

## Acknowledgement

The author thanks Dr. Supreet Saini for hosting him in his lab in the Department of Chemical Engineering at IIT Bombay.

## References

- [1] Kourilsky P (1973) Lysogenization by bacteriophage lambda. I. Multiple infection and the lysogenic response. *Mol. Gen. Genet.* 122:183-195.
- [2] Kobiler O, Rokney A, Friedman N, Court DL, Stavans J, Oppenheim AB (2005) Quantitative kinetic analysis of the bacteriophage lambda genetic network. *Proc Natl Acad Sci U S A* 102:4470-4475.
- [3] Avlund M, Dodd IB, Semsey S, Sneppen K, Krishna S (2009) Why do phage play dice? *J Virol.* 83:11416-11420.
- [4] Kourilsky P (1974) Lysogenization by bacteriophage lambda. II. Identification of genes involved in the multiplicity dependent processes. *Biochimie* 56:1517-1523.
- [5] Banuett F, Hoyt MA, McFarlane L, Echols H, Herskowitz I (1986) *hflB*, a new *Escherichia coli* locus regulating lysogeny and the level of bacteriophage lambda *cII* protein. *J Mol Biol* 187:213-224.
- [6] Kobiler O, Rokney A, Oppenheim AB (2007) Phage lambda CIII: a protease inhibitor regulating the lysis-lysogeny decision. *PLoS One* 2:e363.
- [7] Weitz JS, Mileyko Y, Joh RI, Voit EO (2008) Collective decision making in bacterial viruses. *Biophys J* 95:2673-2680.
- [8] Court DL, Oppenheim AB, Adhya SL (2007) A new look at bacteriophage lambda genetic networks. *J Bacteriol* 189:298-304.
- [9] Avlund M, Krishna S, Semsey S, Dodd IB, Sneppen K. (2010) Minimal gene regulatory circuits for a lysis-lysogeny choice in the presence of noise. *PLoS One* 5:e15037.
- [10] Hoopes BC, McClure WR (1985) A *cII*-dependent promoter is located within the Q gene of bacteriophage lambda. *Proc Natl Acad Sci U S A* 82:3134-3138.

- 499 [11] Ho YS, Rosenberg M (1985) Characterization of a third, cII-dependent, coordinately  
500 activated promoter on phage lambda involved in lysogenic development. J Biol Chem  
501 260:11838-11844.
- 502 [12] Svenningsen SL, Costantino N, Court DL, Adhya S (2005) On the role of Cro in lambda  
503 prophage induction. Proc Natl Acad Sci U S A 102: 4465-4469.
- 504 [13] Révet B, von Wilcken-Bergmann B, Bessert H, Barker A, Miller-Hill B (1999) Four  
505 dimers of lambda repressor bound to two suitably spaced pairs of lambda operators
- 506 [14] Ho Y, Lewis M, Rosenberg M (1982) Purification and properties of a transcriptional  
507 activator. The cII protein of phage lambda. J Biol Chem 257: 9128-9134.
- 508 [15] Jain D, Kim Y, Maxwell KL, Beasley S, Zhang R, Gussin GN, Edwards AM, Darst SA  
509 (2005) Crystal structure of bacteriophage lambda cII and its DNA complex. Molecular  
510 Cell 19: 259-269.
- 511 [16] Cui L, Murchland I, Shearwin KE, Dodd IB (2013) Enhancer-like long-range  
512 transcriptional activation by CI-mediated DNA looping. PNAS 110: 29222927.
- 513 [17] Elowitz MB, Levine AJ, Siggia ED, Swain PS (2002) Stochastic gene expression in  
514 single cell. Science 297: 11831186.
- 515 [18] Golding I, Paulsson J, Zawilski SM, Cox EC (2005) Real-time kinetics of gene activity  
516 in individual bacteria. Cell 123: 10251036.
- 517 [19] Gillespie DT (1977) Exact stochastic simulation of coupled chemical reactions. J Phys  
518 Chem 81: 23402361.
