1 **Design Principle of Lysis/Lysogeny Decision vis-a-vis**

2 **Multiplicity of Infection**

3 Dinkar Wadhwa\*

4 Department of Chemical Engineering

5 Indian Institute of Technology Bombay, Mumbai - 400 076, India

6 `dinkar.wadhwa84@gmail.com`

7 \*The author is not currently affiliated with the institution.

8

## 9 Abstract

10 Bacteriophage lambda possesses dual strategy of replication. Upon infecting its host, *Escherichia*  
11 *coli*, it can either choose lytic pathway, in which the host undergoes lysis, releasing hundreds  
12 of progeny viruses, or opt for lysogeny, in which the viral genome exists as part of bacterial  
13 chromosome known as prophage. Classic and molecular studies have shown that the lysis/lysogeny  
14 decision depends upon the number of coinfecting phages, viz. the multiplicity of infection  
15 (MoI): lysis at low MoI; lysogeny at high MoI. Here, by constructing an expression for quality  
16 of the lysis/lysogeny minimalist two-protein switch which, beside another thing, demands  
17 high equilibrium concentration of Cro-like protein (Lyt) and low equilibrium concentration of  
18 CI-like protein (Lys) - that is, lytic development - at MoI of 1, and vice versa - that is, lysogeny  
19 development - at MoI of 2, I demonstrate that positive feedback loop formed by activation of  
20 *cI*'s transcription by its own product in a cooperative manner underlies the switch's design. The  
21 minimalist two-protein model is justified by showing its analogy with the GRN responsible for  
22 lysis/lysogeny decision. Existence of another stable state at MoI of 1 is argued to be responsible  
23 for lysogen stability. By comparing the minimalist model and its variants, possessing the  
24 positive feedback loop, with other models, without having the positive feedback loop, such  
25 as the mutual repression model, it is shown why lysis/lysogeny switch involving positive  
26 autoregulation of *cI* is evolved instead of one without it. A three-protein simplified version  
27 of lambda switch is shown to be equivalent to a close variant of the two-protein minimalist  
28 switch. Only a fraction, if at all, of parameter sets that produced switch deterministically were  
29 able to do so in stochastic simulations more than 95% of the time. Another stable state at MoI  
30 of 1 was not found during stochastic simulation.

31

32 **Keywords:** Bacteriophage  $\lambda$ , switch, positive feedback, bistability

### 33 Introduction

34 Virulent bacteriophages possess only one method of replication; that is, lytic strategy. However,  
35 other bacteriophages have a dual perpetuation strategy, viz. lytic and lysogeny. In lytic strategy,  
36 phage injects its genetic material into the host bacterium, viral genes are transcribed, m-RNAs,  
37 thus produced, are translated, and phage's genetic material is replicated. Finally, the host  
38 bacterium undergoes lysis, releasing progeny particles. In lysogeny, lytic pathway is repressed,  
39 the viral genome is integrated into that of the host bacterium, and thus, it exists in a latent  
40 form known as prophage. As the teleological explanation goes, lytic strategy leads to fast  
41 multiplication, but it's risky, as viral progenies have to find new hosts which don't already  
42 contain lysogenized phages. On the other hand, a lysogenized phage replicates along with its  
43 host, and therefore, reproduces by a slower process as compared to lytic strategy, but this way  
44 phage safeguards its survival. Should a phage infect a bacterium containing lysogenized phage,  
45 lambda repressors (CI) present in the cytosol will not allow expression from  $pR$ . Thus, the  
46 newly entered phage would remain inert and, ultimately, get digested by the host's nucleases.

47 Classic [1] and molecular studies [2] have shown that the lysis/lysogeny decision depends  
48 upon MoI. Avlund et al. analysed [3] Kourilsky's data [1,4] and determined the probability of  
49 lysogeny at MoI of 1 to be almost zero, at MoI of 2 to be around 0.6960, and at all higher  
50 MoIs to be around 0.9886. This ability of phage to choose between lysis and lysogeny based  
51 upon multiplicity of infection is but a form of quorum sensing occurring inside a bacterium.  
52 As described in sections below, a minimalist two-protein model, which was analogous to  
53 lambda's GRN, and many other models were constructed. The models were evaluated on the  
54 quality of switch they generated, by solving their defining equations using parameters, which  
55 were searched in two steps (see Methods), and few sets of Hill coefficients. It is shown that  
56 positive feedback loop formed by CI activating transcription of its own gene is the essence of  
57 lysis/lysogeny switch's model. Lastly, a three-protein simplified version of lambda switch is  
58 constructed in which the roles of Lyt and Lys are identical to those of Cro and CI in the latter,  
59 respectively, and the function of CII-like protein is fairly similar to that of CII in the latter.

## 60 **Result and discussion**

### 61 **Minimalist two-protein lysis/lysogeny switch**

62 The promoter of *lyt* gene is constitutive; whereas, that of *lys* gene is positively regulated as  
63 they are in lambda phage's GRN. The role of Lys in the minimalist two-protein model; that  
64 is, binding cooperatively to the intergenic region, activating transcription of its own gene, and  
65 inhibiting transcription of *lyt* gene, is identical to that of CI in lambda phage's GRN. The role  
66 of Lyt was conceptualized from first principle in the following way. At MoI of 2, equilibrium  
67 concentrations of Lyt and Lys should be much lower and higher, respectively, as compared to  
68 those at MoI of 1. However, if Lyt did not bind to *lys* promoter, assuming no basal expression  
69 of *lys* (which is weak promoter anyway), equilibrium concentration of Lyt at MoI 2 would be  
70 even higher, let alone much lower, than that at MoI of 1. And equilibrium concentration of Lys  
71 would be very low, instead of being high enough to repress *lyt*, at MoI of 2. Since the only  
72 protein present to actuate any process is Lyt, it was argued that Lyt should engender lysogeny  
73 and inhibit lytic pathway at MoI of 2.

74 Thus, Lyt activates transcription of *lys* (whose product causes lysogeny development),  
75 represses transcription of its own gene, thereby suppressing lytic development (though, as  
76 shown below, the last interaction is dispensable), and activates imaginary downstream pathway  
77 which leads to lytic development. This seemingly paradoxical role of Lyt, as explained below,  
78 is due to it being proxy for CII, which causes lysogeny, and anti-termination factor Q, which  
79 enables transcription of lytic genes. The positive feedback loop constituted by transcriptional  
80 activation of *lys* by its own protein causes Lys to accumulate to low concentration at MoI of 1  
81 and high concentration at MoI of 2. Thus, at MoI of 1 Lyt's equilibrium concentration is high  
82 because it is constitutively produced and Lys' equilibrium concentration is not high enough to  
83 repress its production. On the other hand, at MoI of 2 Lyt's equilibrium concentration is low  
84 because of repression by Lys, which is present in high concentration.

85 GRN underlying lysis/lysogeny decision is much more complex than the minimalist two-protein

86 model proposed here, because MoI is but one of many signals taken into account by the  
87 phage to decide between lysis and lysogeny. Since the expression for quality of lysis/lysogeny  
88 switch (the switching quotient) takes equilibrium values into account, the values of degradation  
89 constants of  $X$  (concentration of Lyt) and  $Y$  (concentration of Lys), viz.  $k_2$  and  $k_5$ , respectively,  
90 can be subsumed into  $k_1$ ,  $k_3$ , and  $k_4$ . Hence, they are taken to be unity for all two-protein  
91 models. This model would henceforth be referred to as 1A\_Lyt\_Lys.

92

93 **1A\_Cro\_CI:**

$$\frac{dX}{dt} = \frac{mk_1}{1 + \frac{X^a}{K_{D1}} + \frac{Y^b}{K_{D2}}} - k_2X \quad (1)$$

$$\frac{dY}{dt} = \frac{m(k_3 \frac{X^a}{K_{D1}} + k_4 \frac{Y^b}{K_{D2}})}{1 + \frac{X^a}{K_{D1}} + \frac{Y^b}{K_{D2}}} - k_5Y \quad (2)$$

94 where,  $m$  is multiplicity of infection,  $k_1$  is basal expression rate of *lys*,  $k_3$  and  $k_4$  are rate  
95 constants for transcriptional activation of *lys* by Lyt and Lys, respectively,  $K_{D1}$  and  $K_{D2}$  are  
96 the "combined" dissociation constants of Lyt and Lys, respectively (see Methods). In those  
97 models where *lys* has basal expression,  $k_3$  represents basal expression rate. Exponents  $a$  and  $b$   
98 are Hill coefficients for binding of Lyt and Lys, respectively.

99 **Analogy between the minimalist two-protein model (1A\_Lyt\_Lys) and lambda**  
100 **phages GRN**

101 Upon infection, RNA polymerase transcribes from the constitutive promoters,  $pL$  and  $pR$ , till it  
102 encounters transcription terminators  $tLI$  and  $tRI$ , respectively.  $N$  and  $cro$  genes are transcribed  
103 by  $pL$  and  $pR$ , respectively. The product of  $N$  is an anti-termination factor that modifies  
104 subsequent RNAPs initiating at  $pL$  and  $pR$  so that they move past their respective terminators  
105 and transcribe  $cIII$  and  $cII$  genes, respectively. Such an RNAP from  $pR$  is also able to transcribe

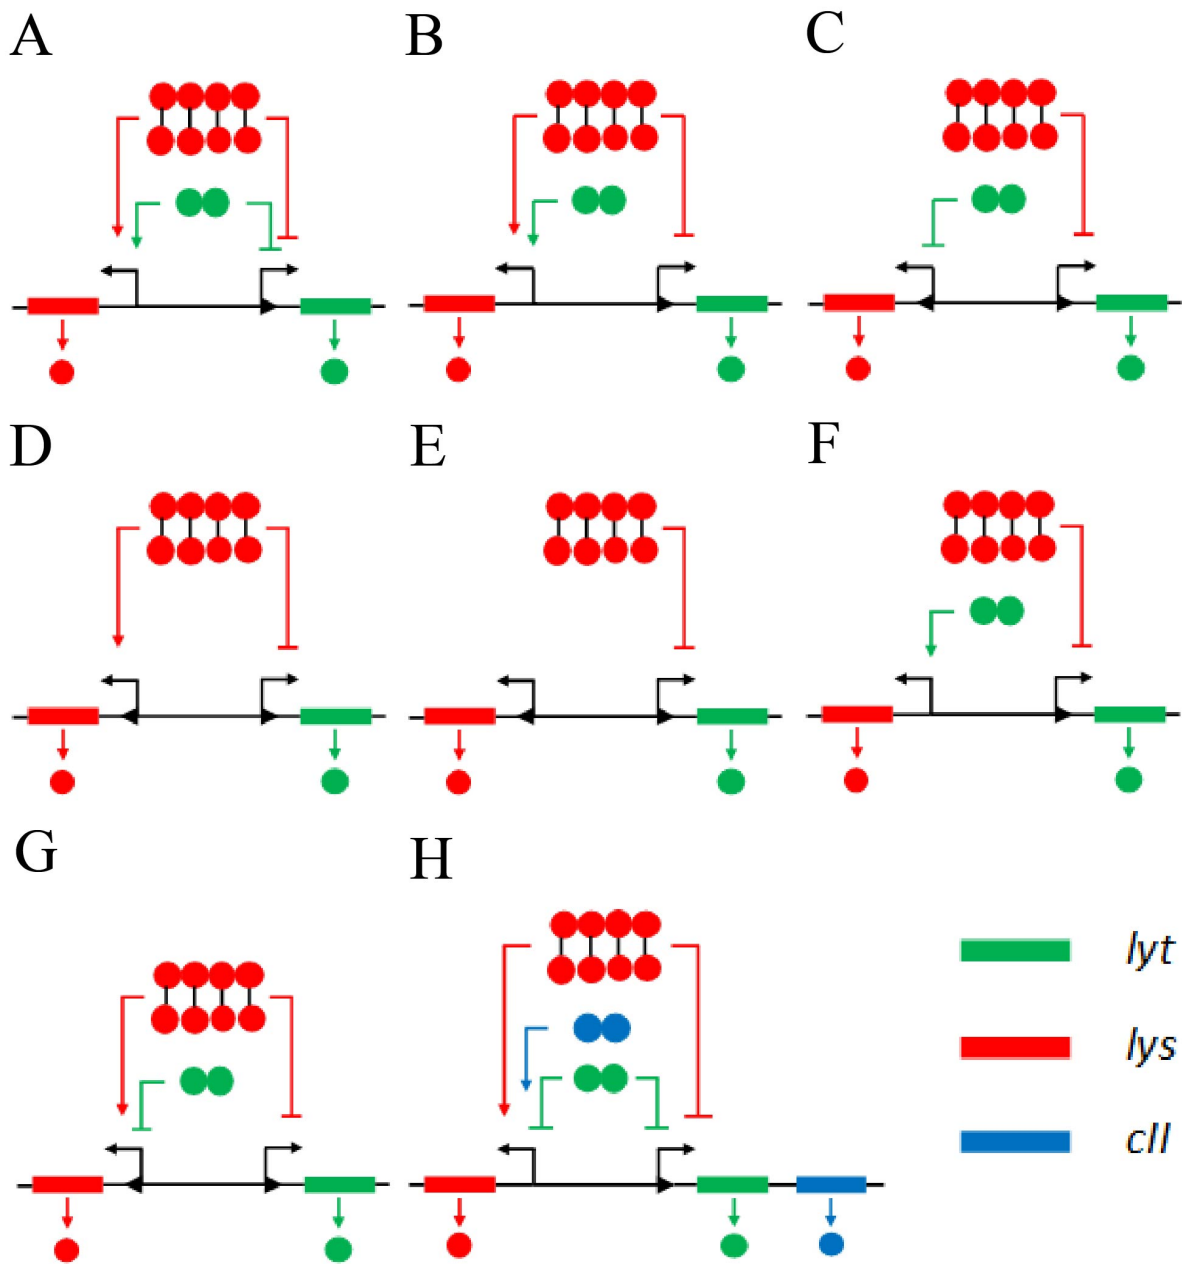

**Figure 1:** Various two-protein models, and three-protein model. Lower arrowhead represents basal expression. (A) The minimalist model or 1A\_Lyt\_Lys. (B) Previous model with self-repression of *lyt* removed or 1B\_Lyt\_Lys. (C) Mutual repression or 2\_Lyt\_Lys. (D) 3\_Lyt\_Lys. (E) 4\_Lyt\_Lys. (F) 5\_Lyt\_Lys. (G) 6\_Lyt\_Lys. (H) A three-protein simplified version of lambda switch or Lyt\_Lys\_CII.

106 through another terminator, *tR2*, present upstream of gene *Q* (see Figure 2). Up to this point,  
107 the pathway for lytic and lysogeny are identical. Lytic pathway is chosen when the extended  
108 transcription from *pR* also causes gene *Q* to be transcribed. *Q*, being an anti-termination factor,  
109 causes transcription of *pR'* to not terminate, as it would otherwise do, at *tR'*, which is present  
110 at about 200 bases away from the beginning, thereby allowing transcription of the lytic genes  
111 downstream of *Q*. Once this happens, the cell is committed to lysis. CIII protein has an indirect  
112 role in establishing lysogeny. It prevents the degradation of CII by inhibiting bacterial protease  
113 HflB [5,6]. As the current paper focuses on the design principle of lysis/lysogeny switch, the  
114 (indirect) role of cIII will not be taken into consideration.

115 In lambda's GRN, *cII* and *Q* are under the control of promoter *pR*. Since in 1A\_Lyt\_Lys  
116 *lyt* is transcribed from *pR*, *Lyt* protein should be functionally equivalent to CII and *Q*. That  
117 is, on the whole, CII and *Q* should carry out three actions: activate transcription from *lys*,  
118 inhibit transcription from *lyt* gene, and engender lytic development. When CII accumulates  
119 in sufficient concentration, it activates transcription from three promoters: *pI*, *pRE*, and *pAQ*  
120 [10,11]. Promoter *pI* transcribes *int* gene, required for the integration of phage genome into  
121 that of the host bacterium. Transcript produced from *pRE* contains orf for *cI*; hence, activation  
122 of this promoter leads to production of *CI*. Thus, the action of CII on promoters *pI* and *pRE*  
123 is functionally equivalent to *Lyt* protein activating transcription of *lys*. Notably, while the role  
124 of *Cro* in lambda's GRN is to inhibit the expression of *lys*, *Cro*-like protein (*Lyt*) activates the  
125 expression of *lys* in the 1A\_Lyt\_Lys.

126 CII inhibits lytic development by activating transcription from *pAQ*, which is located  
127 within *Q* gene in the opposite polarity. The transcript, thus produced, being antisense to (a part  
128 of) *Q* mRNA hybridizes with the latter, thereby preventing the translation of *Q* m-RNA, which  
129 is essential for lytic development [2]. Thus, the action of CII on promoter *pAQ* is functionally  
130 equivalent to *Lyt* protein inhibiting transcription of its own gene. If CII is not produced in  
131 sufficient amount, *Q* m-RNA is translated and anti-terminator *Q*, thus produced, causes lysis.

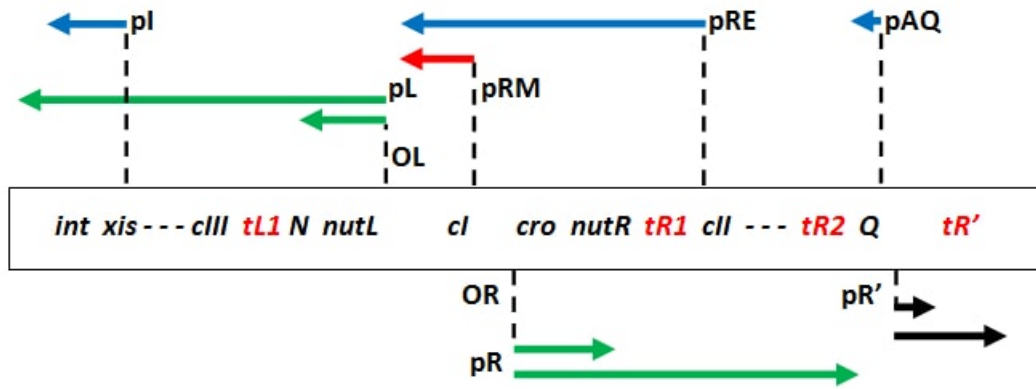

**Figure 2:** GRN and transcription map of lambda (adapted from Figure 1 of [8]). Transcripts that are produced earliest, viz. from *pL* and *pR* promoters, are depicted as green arrows. The late transcript, viz. from *pR'*, is a black arrow. Transcripts from CII-activated promoters, viz. *pI*, *pRE*, and *pAQ*, are shown as blue arrows. Transcript from *pRM*, which is activated by CI, is shown as red arrow. Transcription terminators, namely *tL1*, *tR1*, and *tR2*, are depicted in red.

## 132 Variants of 1A\_Lyt\_Lys and mutual repression model

133 In order to better demonstrate that the positive feedback underlies lysis/lysogeny switch, I  
 134 considered variants of 1A\_Lyt\_Lys, mutual repression model, which doesn't have positive feedback  
 135 loop, and its variants, and a model having the features of 1A\_Lyt\_Lys and mutual repression  
 136 model. Since two features, viz. constitutive expression of *lys* and its inhibition by Lys, are  
 137 common, they would not be mentioned in the description of the models below. Since *cl* gene  
 138 is positively regulated in lambda's GRN, *lys* has to have either basal expression or be activated  
 139 by Lyt. All of these models can be categorized in terms of three factors, as shown in the Table  
 140 1. First column shows whether *lys* possesses basal expression or is activated by Lyt. Second  
 141 column shows if positive feedback, constituted by transcriptional activation of *lys* by its own  
 142 product, is present. Third column shows if inhibition of *lys* by Lyt is present. Inhibition of  
 143 *lys* by Lyt can only be present when *lys* possesses basal expression. Thus, for *lys* having basal  
 144 expression, there are four models; and where it gets activated by Lyt, there are two models.  
 145

146 **1B\_Lyt\_Lys:** This model differs from 1A\_Lyt\_Lys only in not having self-inhibition of Lyt. The  
 147 inhibition of *lys*, required at MoI of 2, by its own product is dispensable, as Lys performs the



**Table 1:** Classification of additional two-protein models.

| Model      | Basal expression of <i>lys</i> /<br>Activation of <i>lys</i> by <i>Lyt</i> | Activation of <i>lys</i><br>by <i>Lys</i> | Inhibition of <i>lys</i><br>by <i>Lyt</i> |
|------------|----------------------------------------------------------------------------|-------------------------------------------|-------------------------------------------|
| 1B_Lyt_Lys | Activation                                                                 | Yes                                       | N/A                                       |
| 5_Lyt_Lys  | Activation                                                                 | No                                        | N/A                                       |
| 3_Lyt_Lys  | Basal                                                                      | Yes                                       | No                                        |
| 6_Lyt_Lys  | Basal                                                                      | Yes                                       | Yes                                       |
| 4_Lyt_Lys  | Basal                                                                      | No                                        | No                                        |
| 2_Lyt_Lys  | Basal                                                                      | No                                        | Yes                                       |

148 same function, and more so, because at MoI of 2 *Lyt*'s concentration is required to be much  
 149 lower than that of *Lys* in order for switch to be of good quality. In terms of lambda's GRN, this  
 150 would mean CI, instead of CII, activating transcription from *pAQ*.

$$\frac{dX}{dt} = \frac{mk_1(1 + \frac{X^a}{KD_1})}{1 + \frac{X^a}{KD_1} + \frac{Y^b}{KD_2}} - k_2X \quad (3)$$

$$\frac{dY}{dt} = \frac{m(k_3\frac{X^a}{KD_1} + k_4\frac{Y^b}{KD_2})}{1 + \frac{X^a}{KD_1} + \frac{Y^b}{KD_2}} - k_5Y \quad (4)$$

151 **2\_Lyt\_Lys** (Mutual repression): *Lyt* represses *lys*, which has basal expression.

$$\frac{dX}{dt} = \frac{mk_1(1 + \frac{X^a}{KD_1})}{1 + \frac{X^a}{KD_1} + \frac{Y^b}{KD_2}} - k_2X \quad (5)$$

$$\frac{dY}{dt} = \frac{mk_3(1 + \frac{Y^b}{KD_2})}{1 + \frac{X^a}{KD_1} + \frac{Y^b}{KD_2}} - k_5Y \quad (6)$$

152 **3\_Lyt\_Lys:** *lys* has basal expression and is activated by Lys cooperatively.

$$\frac{dX}{dt} = \frac{mk_1}{1 + \frac{Y^b}{K_{D2}}} - k_2X \quad (7)$$

$$\frac{dY}{dt} = \frac{m(k_3 + k_4 \frac{Y^b}{K_{D2}})}{1 + \frac{Y^b}{K_{D2}}} - k_5Y \quad (8)$$

153 **4\_Lyt\_Lys:** *lys* has basal expression.

$$\frac{dX}{dt} = \frac{mk_1}{1 + \frac{Y^b}{K_{D2}}} - k_2X \quad (9)$$

$$\frac{dY}{dt} = mk_3 - k_5Y \quad (10)$$

154 **5\_Lyt\_Lys:** *lys* is activated by Lyt.

$$\frac{dX}{dt} = \frac{mk_1(1 + \frac{X^a}{K_{D1}})}{1 + \frac{X^a}{K_{D1}} + \frac{Y^b}{K_{D2}}} - k_2X \quad (11)$$

$$\frac{dY}{dt} = \frac{mk_3 \frac{X^a}{K_{D1}}}{1 + \frac{X^a}{K_{D1}} + \frac{Y^b}{K_{D2}}} - k_5Y \quad (12)$$

155 **6\_Lyt\_Lys:** *lys* has basal expression, is activated by Lys, and inhibited by Lyt.

$$\frac{dX}{dt} = \frac{mk_1(1 + \frac{X^a}{K_{D1}})}{1 + \frac{X^a}{K_{D1}} + \frac{Y^b}{K_{D2}}} - k_2X \quad (13)$$

$$\frac{dY}{dt} = \frac{m(k_3 + k_4 \frac{Y^b}{K_{D2}})}{1 + \frac{X^a}{K_{D1}} + \frac{Y^b}{K_{D2}}} - k_5 Y \quad (14)$$

## 156 **Deterministic simulation**

157 Since Cro forms dimer, Hill coefficient for Lyt's binding is considered to be 2; whereas, since  
158 CI forms tetramer, Hill coefficient for Lys' binding was taken to be 4. However, in the interest  
159 of completeness, another set of Hill coefficients, viz. a=2, b=2, was also considered. The rate  
160 constants and dissociation constants of equations defining a given model were searched (see  
161 Methods) in two stages: order search and linear search (as they are called here). For a given  
162 model and set of Hill coefficients (a and b), a set of rate constants and dissociation constants  
163 would henceforth be referred to as a parameter set (That is, Hill coefficients are not part of  
164 parameter set). Parameter sets were selected on the basis of quality of switch, viz. switch  
165 quotient (as it is called here), they generated. Switch quotient was initially considered to be  
166 determined by the expression

$$SQ = \frac{(S_1 - S_2)}{S_1}$$

167  $S_1 = \min\{\text{Lyt at MoI of 1, Lys at MoI of 2}\}$

168  $S_2 = \max\{\text{Lys at MoI of 1, Lyt at MoI of 2}\}$

169 The expression, however, selected parameter sets which gave unequal equilibrium values of Lyt  
170 at MoI of 1 and Lys at MoI of 2. From the perspective of simplicity, I believe that the difference  
171 between the two should be minimal; therefore, the previous expression is multiplied by ratio of  
172  $S_1$  to  $S_3$  in order to penalize the difference between  $S_3$  and  $S_1$ .

$$SQ = \frac{(S_1 - S_2)}{S_1} \cdot \frac{S_1}{S_3} = \frac{(S_1 - S_2)}{S_3}$$

173  $S_3 = \max\{\text{Lyt at MoI of 1, Lys at MoI of 2}\}$

174 This expression (like the older one) varies between 0 and 1. Only those parameter sets were

175 selected whose corresponding switch quotients (SQ) were positive.

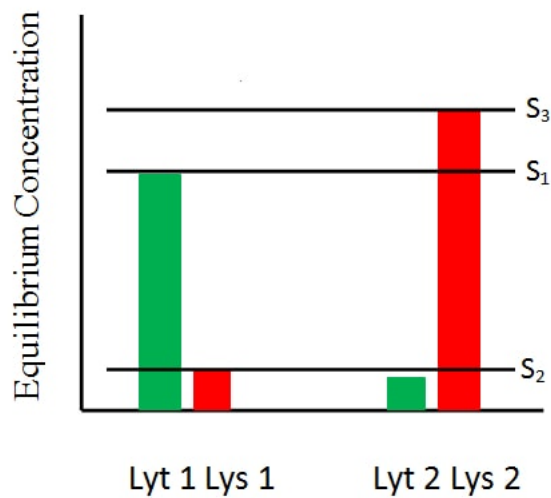

**Figure 3:** Schematic of switch's profile, viz. equilibrium concentrations of Lyt and Lys at the two MoIs.

176 As Table 2 shows, all of the models possessing the positive feedback loop have average  
177 deterministic switch quotient (DSQ) of more than 0.97 for both sets of Hill coefficients (lowest  
178 DSQ among all the models in this category was 0.9270). Mutual repression model for Hill  
179 coefficients' set of  $a=2$ ,  $b=2$  have average DSQ of 0.5283 (highest DSQ was 0.6666); and,  
180 for that of  $a=2$ ,  $b=4$  all DSQs were more than 0.9 except for one parameter set, whose DSQ  
181 was 0.5. 4\_Lyt\_Lys for Hill coefficients' set of  $a=2$ ,  $b=2$  gives DSQs of 0.4794 and 0.4707;  
182 and, for that of  $a=2$ ,  $b=4$  both DSQs were almost 0.5. Thus, if we exclude 2\_Lyt\_Lys for  
183 Hill coefficients' set of  $a=2$ ,  $b=4$  from the analysis, average DSQs of models with the positive  
184 feedback loop, viz. 1A\_Lyt\_Lys, 1A\_Lyt(1)\_Lys, 1B\_Lyt\_Lys, 3\_Lyt\_Lys, and 6\_Lyt\_Lys, were  
185 much higher than average DSQs of models without it, viz. 2\_Lyt\_Lys and 4\_Lyt\_Lys. Not just  
186 that, the lowest DSQ among the first set of models was much higher than the highest DSQ  
187 among the second set of models.

188 In the former set, Lys activating its own gene lets the value of Lys at MoI of 1 to be  
189 disproportionately lower for its desired particular value at MoI of 2. On the other hand,  
190 in 4\_Lyt\_Lys, since increase in genome copy number leads to proportional increase in the

191 equilibrium activity of *lys'* promoter, value of Lys at MoI of 1 would be half its value at MoI of  
 192 2. However, mutual repression model does generate many parameter sets with SQ greater than  
 193 0.9 for Hill coefficients' set of a=2, b=4. Since this model exhibits very different behaviour in  
 194 the stochastic simulations, it will be discussed further in the section for stochastic simulations.

**Table 2:** Average and SD of SQs under deterministic and stochastic conditions for various thresholds of stochastic success rate.

| Model             | AVG Deterministic SQ<br>(SD) |                    | AVG Deterministic SQ<br>(SD) |                    | AVG Stochastic SQ<br>(SD) |                    |
|-------------------|------------------------------|--------------------|------------------------------|--------------------|---------------------------|--------------------|
|                   | (SSR <sup>a</sup> ≥ 95)      |                    |                              |                    |                           |                    |
|                   | a=2, b=2                     | a=2, b=4           | a=2, b=2                     | a=2, b=4           | a=2, b=2                  | a=2, b=4           |
| 1A_Lyt_Lys        | 0.9917<br>(0.0106)           | 0.9896<br>(0.0049) | 0.9898<br>(N/A)              | 0.9905<br>(0.0043) | 0.7997<br>(N/A)           | 0.6204<br>(0.0624) |
| 1A_Lyt(1)_Lys     | 0.9950<br>(0.0053)           | 0.9923<br>(0.0045) | none                         | none               | none                      | none               |
| 1B_Lyt_Lys        | 0.9806<br>(0.0236)           | 0.9769<br>(0.0277) | 0.9971<br>(N/A)              | 0.9270<br>(N/A)    | 0.7995<br>(N/A)           | 0.7679<br>(N/A)    |
| 2_Lyt_Lys         | 0.5283<br>(0.0696)           | 0.8917<br>(0.1766) | none                         | 0.5001<br>(N/A)    | none                      | 0.2725<br>(N/A)    |
| 3_Lyt_Lys         | 0.9938<br>(0.0078)           | 0.9873<br>(0.0157) | none                         | none               | none                      | none               |
| 4_Lyt_Lys         | 0.4751<br>(0.0043)           | 0.4956<br>(0.0006) | none                         | 0.4956<br>(0.0006) | none                      | 0.2983<br>(0.0102) |
| 6_Lyt_Lys         | 0.9988<br>(0.0004)           | 0.9876<br>(0.0135) | none                         | none               | none                      | none               |
| Lyt_Lys_CII       | 0.9855<br>(0.0155)           | N/A                | 0.9573<br>(N/A)              | N/A                | 0.7526<br>(N/A)           | N/A                |
| Lyt_Lys_CII(1)    | 0.9801<br>(0.0151)           | N/A                | 0.9718<br>(N/A)              | N/A                | 0.7595<br>(N/A)           | N/A                |
| Lyt(1)_Lys_CII(1) | 0.9894<br>(0.0134)           | N/A                | none                         | N/A                | none                      | N/A                |

<sup>a</sup> SSR = Stochastic Success Rate

195 The model 5\_Lyt\_Lys did not generate any parameter set. The reason is that in the absence  
 196 of the positive feedback loop, *lyt* needs to have strong basal expression in order to sustain high  
 197 concentration of Lys, whose gene is activated by Lyt, at MoI of 2. Equivalently, the desired  
 198 high concentration of Lyt at MoI of 1, also leads to excessive production of Lys at the same  
 199 MoI. Thus, both proteins are present in similar amounts at both MoIs. In hindsight, one notes  
 200 that the equations for Lyt and Lys are almost identical for this model.

**Table 3:** Average and SD of SQs under deterministic and stochastic conditions for various thresholds of stochastic success rate.

| Model             | AVG Deterministic SQ        |                    | AVG Stochastic SQ  |                    |
|-------------------|-----------------------------|--------------------|--------------------|--------------------|
|                   | (SD)                        |                    | (SD)               |                    |
|                   | (95 >SSR <sup>a</sup> ≥ 90) |                    | (95 >SSR ≥ 90)     |                    |
|                   | a=2, b=2                    | a=2, b=4           | a=2, b=2           | a=2, b=4           |
| 1A_Lyt_Lys        | 0.9937<br>(0.0025)          | 0.9883<br>(0.0068) | 0.8087<br>(0.0382) | 0.5728<br>(0.1003) |
| 1A_Lyt(1)_Lys     | 0.9945<br>(N/A)             | 0.9930<br>(N/A)    | 0.8084<br>(N/A)    | 0.5825<br>(N/A)    |
| 1B_Lyt_Lys        | 0.9950<br>(N/A)             | 0.9972<br>(0.0020) | 0.7891<br>(N/A)    | 0.6691<br>(0.0855) |
| 2_Lyt_Lys         | none                        | none               | none               | none               |
| 3_Lyt_Lys         | none                        | none               | none               | none               |
| 4_Lyt_Lys         | none                        | none               | none               | none               |
| 6_Lyt_Lys         | none                        | none               | none               | none               |
| Lyt_Lys_CII       | 0.9808<br>(0.0008)          | N/A                | 0.7614<br>(0.0211) | N/A                |
| Lyt_Lys_CII(1)    | 0.9593<br>(N/A)             | N/A                | 0.7551<br>(N/A)    | N/A                |
| Lyt(1)_Lys_CII(1) | 0.9647<br>(N/A)             | N/A                | 0.7178<br>(N/A)    | N/A                |

<sup>a</sup> SSR = Stochastic Success Rate

201 In order to examine the significance of cooperativity in positive feedback here, another set  
202 of Hill coefficients, viz.  $a=2$ ,  $b=1$ , was also considered for 1A\_Lyt\_Lys. However, parameter  
203 sets generated by this set gave DSQs which were almost equal to zero. For models having the  
204 positive feedback loop, average DSQ of parameter sets was very slightly, almost negligibly,  
205 greater for Hill coefficients' set of  $a=2$ ,  $b=2$  than that for set of  $a=2$ ,  $b=4$ .  
206

### 207 **Closer to lambda's GRN: the three-protein model**

208 In order to further verify if 1A\_Lyt\_Lys represents reduced form of lambda's GRN, I consider a  
209 three-protein simplified version of lambda switch and show that it is equivalent to a two-protein  
210 model possessing the positive feedback loop: 1B\_Lyt\_Lys. A CII-like protein is added to  
211 1A\_Lyt\_Lys beside extending the role of Lyt. Since genes *lyt* and *cII* are under the control of  
212 same promoter, in order to allow for potentially different rates of translation of their corresponding  
213 cistrons during stochastic simulations, their mRNAs are considered explicitly. The role of Lyt  
214 in this model is identical to that of Cro in lambda phage's GRN. That is, now Lyt represses  
215 transcription of *lys*, in addition to repressing that of its own gene. The role of CII in the  
216 three-protein model is to activate transcription of *lys*. This corresponds to CII's activation of  
217 *pRE* promoter, leading to synthesis of mRNA which contains orf for *cI*. The three-protein  
218 model considered here is different from that in [7], in which CII activates transcription of *cI*  
219 from a distinct (*pRE*) promoter. Since in the three-protein model, CII has to compete with Lyt,  
220 which represses transcription of *lys*, for binding to the intergenic region, the demonstration of  
221 equivalence of the three-protein model (Lyt\_Lys\_CII) with 1A\_Lyt\_Lys, or any of its variants,  
222 gets more challenging. The degradation constants for  $xz$  (concentration of *lyt-cII* mRNA) ,  
223  $X$  (concentration of Lyt),  $Z$  (concentration of CII), and  $Y$  (concentration of Lys), viz.  $k_6$ ,  
224  $k_7$ ,  $k_9$ ,  $k_8$ , respectively, are taken to be unity for the same reason why degradation constants  
225 for two-protein models were set equal to 1. Since for 1A\_Lyt\_Lys SQs generated by Hill  
226 coefficients' set of  $a=2$ ,  $b=2$  were as high as SQs generated by that of  $a=2$ ,  $b=4$ , applying  
227 occam's razor, Hill coefficients for binding of Lyt and Lys are taken to be 2 and 2, respectively,

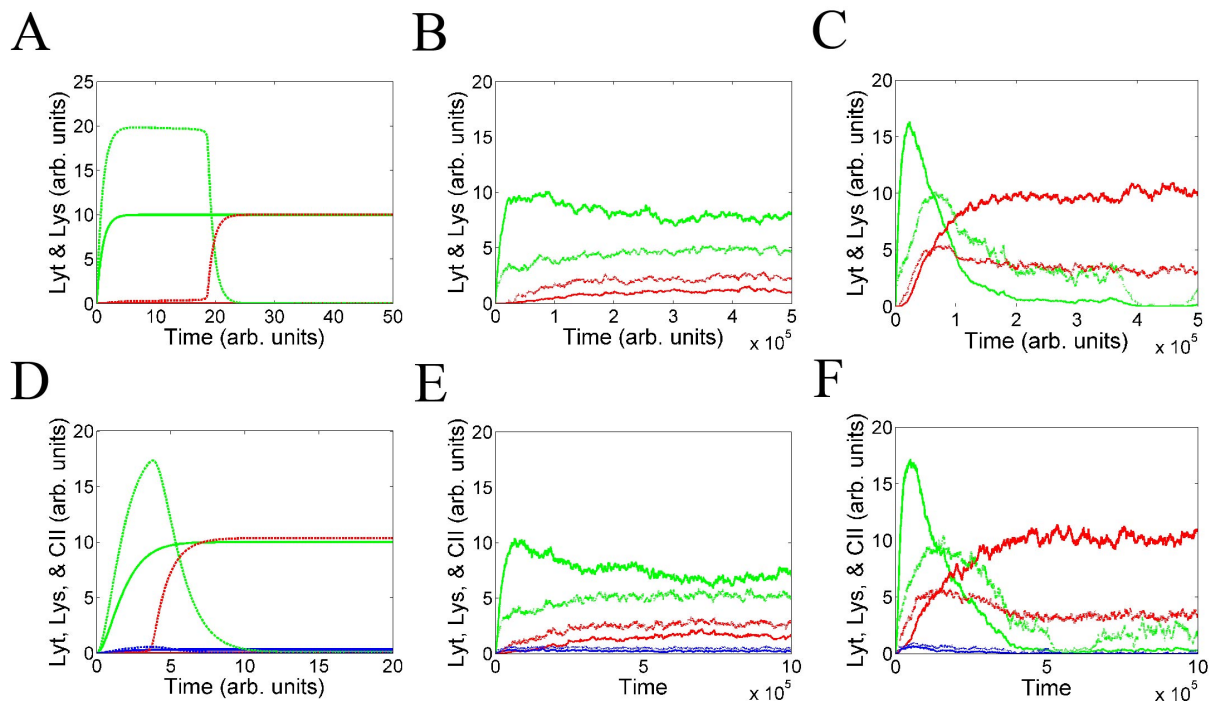

**Figure 4:** Deterministic and stochastic simulations of the minimalist two-protein model (1A\_Lyt\_Lys) and three-protein model (Lyt\_Lys\_CII). Lyt, Lys, and CII are represented by green, red, and blue, respectively. For deterministic simulations, concentrations of proteins at MoI of 1 and 2 are depicted by solid curve and dashed curve, respectively. For stochastic simulations, solid curve and dotted curve, respectively, represent average and standard deviation of number of protein molecules from 500 simulations for two-protein and 200 simulations for three-protein models. For a given model, the parameter set which had maximum stochastic success rate was used for simulation. The stochastic simulation trajectories shown here are qualitatively similar to those of all other models for parameter sets with high stochastic success rate; whereas, the deterministic simulation trajectories were so, irrespective of stochastic success rate. In stochastic simulation graphs, the original abscissa, which had unequally spaced time intervals, was converted to one with equally spaced time intervals. Each (arb.) unit of abscissa was divided into 10000 intervals. For the tiny fraction of intervals which still contained more than one event, their last events were defined to be their only events. **(A)** Deterministic simulations of 1A\_Lyt\_Lys. At MoI of 2, initially, the concentration of Lyt becomes more than its equilibrium concentration at MoI of 1 but then comes back to very low level. It is due to double initial rate of production of Lyt at MoI of 2 as compared to that at MoI of 1; however, as Lyt's concentration increases, *lys*' transcription becomes stronger, leading to production of Lys, which in turn represses *lyt*. **(B-C)** Stochastic simulations of 1A\_Lyt\_Lys for MoI of 1 and 2, respectively. **(D)** Deterministic simulations of Lyt\_Lys\_CII. At MoI of 2, initially, concentrations of Lyt and CII become more than their respective equilibrium concentrations at MoI of 1 but then come back to very low levels. This was also observed for a three-protein model, which is very similar to that of this paper, in a theoretical study [7]. Analogous to the two-protein model, it's due to heightened initial rate of production of CII at MoI of 2 as compared to that at MoI of 1; however, as CII's concentration increases, transcription of *lys* becomes stronger, leading to production of Lys, which represses *lyt* and *cI*. **(E-F)** Stochastic simulations of Lyt\_Lys\_CII for MoI of 1 and 2, respectively. Bell-shaped curve for CII at MoI of 6 was reported by an experimental study [2].



228 not 2 and 4. Further, taking lead from here, Hill coefficient for CII's binding is considered to  
 229 be 2, even though it has been shown to exist as tetramer in solution [14] and in crystallized free  
 230 and DNA-bound state [15].

231 Model equations for three-protein model are as follows.

232

233

234 Transcription of *lyt-cII* genes: 
$$\frac{dxz}{dt} = \frac{mk_1(1 + \frac{Z^c}{K_{D3}})}{1 + \frac{X^a}{K_{D1}} + \frac{Y^b}{K_{D2}} + \frac{Z^c}{K_{D3}}} - k_6xz \quad (15)$$

235 Translation of *lyt*: 
$$\frac{dX}{dt} = k_2xz - k_7X \quad (16)$$

236 Translation of *cII*: 
$$\frac{dZ}{dt} = k_4xz - k_9Z \quad (17)$$

237 Production of Lys: 
$$\frac{dY}{dt} = \frac{m(k_5\frac{Y^b}{K_{D2}} + k_3\frac{Z^c}{K_{D3}})}{1 + \frac{X^a}{K_{D1}} + \frac{Y^b}{K_{D2}} + \frac{Z^c}{K_{D3}}} - k_8Y \quad (18)$$

238 where,  $c$  is the Hill coefficient of CII's binding,  $k_1$  is basal expression rate of *lyt-cII* genes,  $K_{D3}$   
 239 is the "combined" dissociation constant of CII (see Methods),  $k_2$  and  $k_4$  are translation rates of  
 240 *lyt* and *cII*, respectively.  $k_5$  and  $k_3$  are rate constants for transcriptional activation of *lys* by Lys  
 241 and CII, respectively.

242 Equilibrium values of  $xz$ ,  $X$ ,  $Z$ , and  $Y$  are

$$k_6\bar{x}\bar{z} = \frac{mk_1(1 + \frac{\bar{Z}^c}{K_{D3}})}{1 + \frac{\bar{X}^a}{K_{D1}} + \frac{\bar{Y}^b}{K_{D2}} + \frac{\bar{Z}^c}{K_{D3}}} \quad (19)$$

$$k_7\bar{X} = k_2\bar{x}\bar{z} \quad (20)$$

$$k_9 \bar{Z} = k_4 \bar{xz} \quad (21)$$

$$k_8 \bar{Y} = \frac{m(k_5 \frac{\bar{Y}^b}{K_{D2}} + k_3 \frac{\bar{Z}^a}{K_{D3}})}{1 + \frac{\bar{X}^a}{K_{D1}} + \frac{\bar{Y}^b}{K_{D2}} + \frac{\bar{Z}^a}{K_{D3}}} \quad (22)$$

243 From (20) and (21), it can be seen that equilibrium value of CII is in constant proportion to that  
 244 of Lyt. Hence, CII can be written in terms of Lyt

$$\bar{Z} = p \bar{X} \quad (23)$$

245 where

$$p = \frac{k_4 k_7}{k_2 k_9}$$

246 Using (20) and (23), (19) and (22) can be written as

$$\bar{X} = \frac{m \frac{k_1 k_2}{k_6 k_7} (1 + \frac{(p \bar{X})^a}{K_{D3}})}{1 + \bar{X}^a (\frac{1}{K_{D1}} + \frac{p^a}{K_{D3}}) + \frac{\bar{Y}^b}{K_{D2}}} \quad (24)$$

$$\bar{Y} = \frac{m \frac{1}{k_8} (k_5 \frac{\bar{Y}^b}{K_{D2}} + k_3 \frac{(p \bar{X})^a}{K_{D3}})}{1 + \bar{X}^a (\frac{1}{K_{D1}} + \frac{p^a}{K_{D3}}) + \frac{\bar{Y}^b}{K_{D2}}} \quad (25)$$

247 The equivalence of equations (24) and (25) to the defining equations of 1B\_Lyt\_Lys which  
 248 have reached equilibrium validates two-protein model. Two-protein model being sufficient for  
 249 producing lysis/lysogeny switch constitutes an argument that *cro* in lambda's GRN is expendable.  
 250 Mathematically, the reason for Cro being expendable lies in its equilibrium concentration being  
 251 proportional to that of CII.

252 Kobiler et al. [2] showed that infection with lambda lacking cro gene ( $\lambda\text{cro}^-$ ) leads to  
253 production of CII to level sufficient to cause lysogeny even at MoI of 1. This, however, does  
254 not mean that Cro, per se, is required to engender lytic development. Cro represses  $pL$  and  
255  $pR$  by fourfold and twofold, respectively [12]. Thus, the absence of Cro increases the level  
256 of CII in two ways: first, by allowing transcription of  $cII$ , which is under the control of  $pR$ ,  
257 and  $cIII$ , which is under the control of  $pL$  and whose product prevents degradation of CII by  
258 protease HflB. In the wild type strain, parameters associated with transcription rates of  $cII$  and  
259  $cIII$ , translation and degradation rates of their respective mRNAs, and degradation rates of CII  
260 and CIII are such that enough CII is produced, despite Cro's repression of  $pL$  and  $pR$ , at higher  
261 MoIs so as to sufficiently activate  $pRE$  promoter, leading to production of CI to level which  
262 is enough to cause lysogeny. However, when  $cro$  is deleted, CI produced even at MoI of 1 is  
263 enough to engender lysogeny. With appropriate changes in the aforementioned parameters, it  
264 would be possible to model  $\lambda\text{cro}^-$  strain which behaves like its wild type counterpart.

265 As stated above, there are experimental evidences for CII present as tetramer in solution  
266 [14] and in crystallized free and DNA-bound state [15]. Additionally, as Figure 4 in [10] shows,  
267 the binding curve of CII to  $pAQ$  has appreciable lag phase, indicating that it binds as a multimer.  
268 However, Figure 2c in [2] shows that curve of  $pRE$ 's activity with respect to CII levels is not  
269 sigmoidal as expected from multimeric binding, but hyperbolic as seen in monomeric binding.  
270 Therefore, another model was considered where Hill coefficient for CII binding was taken to  
271 be 1 (Lyt\_Lys\_CII(1)). Additionally, one more model was considered where Hill coefficient  
272 for Lyt too was taken to be 1 (Lyt(1)\_Lys\_CII(1)). This made the current author go back to  
273 two-protein models and consider 1A\_Lyt\_Lys model too with Hill coefficients' set of  $a=1, b=2$   
274 and  $a=1, b=4$ , named 1A\_Lyt(1)\_Lys. SQs generated by all new variants were similar in values  
275 to those generated from their counterparts, where Hill coefficient of either Lyt or CII, or both,  
276 were taken to be 2. Specifically, for 1A\_Lyt(1)\_Lys all SQs were more than 0.98 for both sets  
277 of Hill coefficients. For all of the three protein models, all SQs were greater than 0.95. Just like  
278 the Hill coefficients' set of  $a=2, b=1$ , parameter sets generated by the set of  $a=1, b=1$  gave SQs  
279 which were almost equal to zero.

280

## 281 Stochastic simulation

282 Since gene expression is stochastic [17,18], the true validity of results obtained in the deterministic  
 283 simulations lie in their being replicated in the stochastic simulations. Thus, stochastic simulations  
 284 were performed, using Gillespie algorithm [19], for parameter sets obtained in the deterministic  
 285 simulations.

286 For both two-protein and three-protein models, for any given parameter set, SQ generated  
 287 in the stochastic simulation, or stochastic switch quotient (SSQ), was less than its deterministic  
 288 counterpart, viz. DSQ. No parameter set was able to produce switch in every run during  
 289 stochastic simulation. That is because either the SSQ was negative ( $S_1 < S_2$ ) or, rarely,  $S_3$   
 290 was zero. Percentage of runs that produce finite, positive SQs during stochastic simulation for  
 291 a given parameter set and set of Hill coefficients would henceforth be referred to as stochastic  
 292 success rate.

**Table 4:** Number of parameter sets for various ranges of stochastic success rate.

| Model             | SSR <sup>a</sup> ≥ 95 |            | 95 > SSR ≥ 90 |            | 90 > SSR ≥ 80 |            | Total no. of parameter sets |            |
|-------------------|-----------------------|------------|---------------|------------|---------------|------------|-----------------------------|------------|
|                   | a=2<br>b=2            | a=2<br>b=4 | a=2<br>b=2    | a=2<br>b=4 | a=2<br>b=2    | a=2<br>b=4 | a=2<br>b=2                  | a=2<br>b=4 |
| 1A_Lyt_Lys        | 1                     | 4          | 5             | 3          | 10            | 3          | 21                          | 17         |
| 1A_Lyt(1)_Lys     | 0                     | 0          | 1             | 1          | 3             | 9          | 17                          | 15         |
| 1B_Lyt_Lys        | 1                     | 1          | 1             | 5          | 2             | 2          | 11                          | 11         |
| 2_Lyt_Lys         | 0                     | 1          | 0             | 0          | 0             | 0          | 6                           | 6          |
| 3_Lyt_Lys         | 0                     | 0          | 0             | 0          | 1             | 4          | 8                           | 10         |
| 4_Lyt_Lys         | 0                     | 2          | 0             | 0          | 0             | 0          | 2                           | 2          |
| 6_Lyt_Lys         | 0                     | 0          | 0             | 0          | 0             | 0          | 12                          | 12         |
| Lyt_Lys_CII       | 1                     | N/A        | 2             | N/A        | 1             | N/A        | 9                           | N/A        |
| Lyt_Lys_CII(1)    | 1                     | N/A        | 1             | N/A        | 5             | N/A        | 9                           | N/A        |
| Lyt(1)_Lys_CII(1) | 0                     | N/A        | 1             | N/A        | 1             | N/A        | 9                           | N/A        |

<sup>a</sup> SSR = Stochastic Success Rate

293 An interesting property was observed for mutual repression model for Hill coefficients' set  
 294 of a=2, b=4. It was the only set of Hill coefficients for any model lacking the positive feedback

295 that produced a DSQ more than 0.9 (highest SQ for the same model for Hill coefficients' set of  
296  $a=2$ ,  $b=2$  was 0.6666). As aforementioned, all of the parameter sets for Hill coefficients' set of  
297  $a=2$ ,  $b=4$  produced DSQ of more than 0.9 except one, whose DSQ was 0.5. Notably, this is the  
298 parameter set which had very high stochastic success rate, viz. that of 97%; while, maximum  
299 stochastic success rate among other parameter sets was 50%. This peculiar result for mutual  
300 repression has been reported earlier also.

301 Avlund et al. showed that various two-protein models, based upon mutual repression  
302 model, which were able to produce switch in a noise-less environment, did not function when  
303 noise was introduced [9]. However, additional CII-like protein conferred robustness to noise  
304 in 8% of the parameter sets that produced switch deterministically. The different behaviour  
305 of mutual repression model in deterministic simulations with respect to stochastic simulations  
306 warrants theoretical investigation. Notably, one of their rare two-protein models (i.e., b of  
307 Figure 2) which did produce switch even in the presence of noise (though with much lower  
308 success as compared to their three-protein models) is model 6\_Lyt\_Lys in the current paper.

309 Thus, taking into account stochastic success rate of at least 95%, two-protein models can  
310 be divided into two sets based upon DSQs or SSQs. One set comprises of two models with the  
311 positive feedback loop, viz. 1A\_Lyt\_Lys and 1B\_Lyt\_Lys, and another without it, viz. 2\_Lyt\_Lys  
312 and 4\_Lyt\_Lys. The one with the positive feedback loop has appreciably higher DSQs and SSQs  
313 than the one without it. In fact, the lowest DSQ and SSQ among the first set of models were  
314 much higher than the highest DSQ and SSQ, respectively, among the second set of models. The  
315 comparison could not be made for stochastic success rate's range of less than 95% and greater  
316 than or equal to 90% because neither 2\_Lyt\_Lys nor 4\_Lyt\_Lys produced switch.

317 However, for the same two thresholds of stochastic success rate, average SSQs for parameter  
318 sets with Hill coefficients' set of  $a=2$ ,  $b=2$  were greater than average SSQs for those with Hill  
319 coefficients' set of  $a=2$ ,  $b=4$ , for any given model (Table 2 and Table 3). Not just that, the lowest  
320 SSQ among parameter sets with Hill coefficients' set of  $a=2$ ,  $b=2$  was greater than the highest  
321 SSQ among those with Hill coefficients' set of  $a=2$ ,  $b=4$ , for any given model. This result is  
322 against one's expectation: since Lys activating transcription of its own gene in a cooperative

323 manner is crux of the switch, increasing Hill coefficient of Lys should have, if at all, increased  
 324 the SSQ. This comparison could not be made in models without the positive feedback loop  
 325 because none of their parameter sets with Hill coefficients' set of  $a=2$ ,  $b=2$  had stochastic  
 326 success rate of at least 90%.  
 327

**Table 5:** Maximum stochastic success rate.

| Model             | Hill coefficients' set | Maximum stochastic success rate |
|-------------------|------------------------|---------------------------------|
| 1A_Lyt_Lys        | $a=2$ , $b=4$          | 96.8                            |
| 1A_Lyt(1)_Lys     | $a=1$ , $b=2$          | 91                              |
| 1B_Lyt_Lys        | $a=2$ , $b=4$          | 97.2                            |
| 2_Lyt_Lys         | $a=2$ , $b=4$          | 97                              |
| 3_Lyt_Lys         | $a=2$ , $b=4$          | 87                              |
| 4_Lyt_Lys         | $a=2$ , $b=4$          | 98.8                            |
| 6_Lyt_Lys         | $a=2$ , $b=4$          | 73                              |
| Lyt_Lys_CII       | $a=2$ , $b=2$ , $c=2$  | 95.5                            |
| Lyt_Lys_CII(1)    | $a=2$ , $b=2$ , $c=1$  | 97                              |
| Lyt(1)_Lys_CII(1) | $a=1$ , $b=2$ , $c=1$  | 93.5                            |

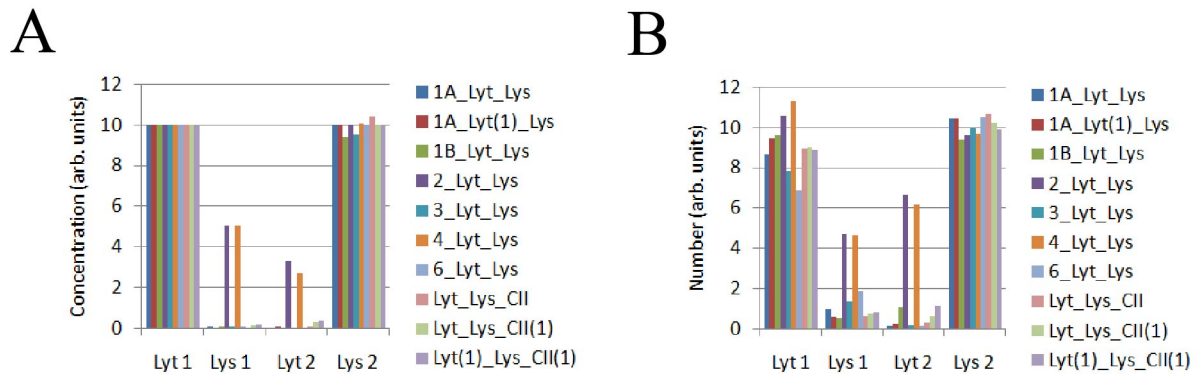

**Figure 5:** Equilibrium values correspond to those parameter sets which gave maximum stochastic success rate for their respective models (see Table 5). (A) Deterministic simulations. (B) Stochastic simulations. Note how the values of Lys at MoI of 1 and Lyt at MoI of 2 for 2\_Lyt\_Lys and 4\_Lyt\_Lys are much higher than those of the any other model.

## 328 **Bistability at MoI of 1 and lysogen stability**

329 In this study, parameter sets were searched for their ability to cause lysis at MoI of 1 and  
330 lysogeny at MoI of 2. However, if only one of the phage genomes gets integrated into the  
331 bacterial chromosome, it would not be able to maintain lysogeny, and lysis would ensue, if  
332 only one stable state existed at MoI of 1. In the deterministic simulations, all of the two-protein  
333 models possessing the positive feedback exhibited bistability at MoI of 1 for all of the parameter  
334 sets, except one (for 1B\_Lyt\_Lys). In the other stable state, the concentration of Lyt is almost  
335 zero and that of Lys is about half of its concentration at MoI of 2. Arguably, in lambda's system,  
336 the level of Lys in the second stable state would be high enough to maintain lysogeny.

337 For 4\_Lyt\_Lys, none of the parameter sets produced bistability at MoI of 1. For 2\_Lyt\_Lys,  
338 for Hill coefficients set of  $a=2$ ,  $b=2$  one parameter set generated bistability at MoI of 1, but its  
339 stochastic success rate was just 7.6% (Bistability exists for two more parameter sets, but their  
340 second stable states are at very high values of Lyt ( $>50$ ) and very low values of Lys ( $<2$ ); hence,  
341 inconsequential for lysogeny maintenance, and in any case, never reached by the phase point).  
342 For Hill coefficients set of  $a=2$ ,  $b=4$ , the only parameter set which did not exhibit bistability  
343 at MoI of 1 had stochastic success rate of 97%, while maximum stochastic success rate among  
344 other parameter sets was 50% (as aforementioned in the section for stochastic simulations). All  
345 of the three-protein models exhibited bistability at MoI of 1. The Lyt and Lys values of second  
346 stable states at MoI of 1 in three-protein models are about same as those of second stable states  
347 in two-protein models at the said MoI.

348 DNA between OL and OR sites forms a loop that has been shown to be important for the  
349 stable maintenance of lysogeny [12]. The loop forms due to interaction between CI dimers  
350 bound at OL1 and OL2 with those bound at OR1 and OR2 [13]. Therefore, the contribution of  
351 OL-CI-OR complex to production of CI would be represented by adding a term proportional to  
352  $[CI]^8$ , raised to the power 8, to numerator and denominator. Since bistability at MoI of 1 in the  
353 two-protein models is the consequence of *lys'* transcription getting activated by its own product  
354 in a cooperative manner (i.e., by the binding of Lys dimer), in lambda's GRN, activation of

355 *cI*'s promoter when present in looped DNA, stabilized by CI octamer, would either generate  
356 bistability or contribute to already existing bistability due to two CI dimers activating the  
357 transcription of *cI*. Thus, it is reasonable to propose that the role of OL-CI-OR loop formation  
358 is to produce or strengthen bistability at MoI of 1. This argument becomes stronger in the light  
359 of the finding that looping also activates transcription from *pRM* by allowing the  $\alpha$ -CTD of  
360 RNAP bound at *pRM* to contact UP element at OL [16]. The heightened rate of transcription  
361 from *pRM* when present in looped DNA would also lead to higher equilibrium concentration  
362 of CI in the other stable state, thereby enabling better maintenance of lysogeny.

363 During prophage induction, Lys undergoes autocleavage, facilitated by activated RecA  
364 coprotease [20], which results into removal of repression of pL and pR and lytic development  
365 ensues. As can be seen in the phase diagram (Figure 6), Lys' concentration should become  
366 extremely low for prophage induction to occur, viz. phase point reaching fixed point representing  
367 lysis, thereby making this process hard to achieve. This result was seen for all of the parameter  
368 sets exhibiting bistability. This could be explained away by simply noting that the criterion  
369 of parameter selection here does not include the process of prophage induction. That would  
370 have demanded the threshold of Lys' concentration for induction to be neither too high, so that  
371 lysogen becomes unstable, nor too low, so that induction becomes difficult. In the stochastic  
372 simulations, however, none of the two-protein and three-protein models produced bistability at  
373 MoI of 1.

374 At MoI of 2, only two models, viz. 2.Lyt\_Lys and 6.Lyt\_Lys, show bistability for about  
375 80% and 60%, respectively, of the parameter sets. Notably, only these two models have Lyt  
376 repressing the transcription of *lys*. Since at the second stable state the concentration of Lyt is  
377 very high and that of Lys is very low, a parameter set would not, if at all, generate switch with  
378 high DSQ if its phase point reached this stable fixed point. Hence, bistability at MoI of 2 is  
379 inconsequential.

380



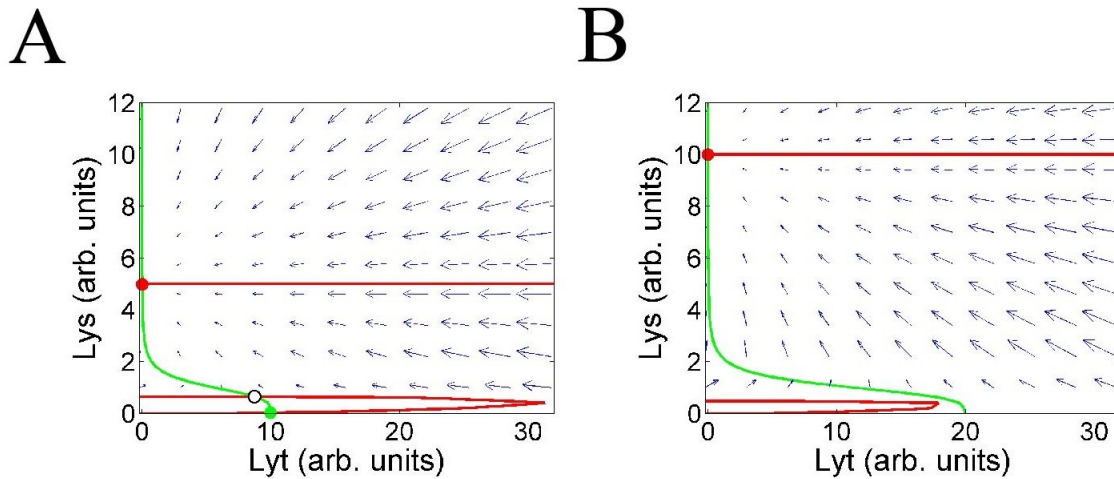

**Figure 6:** (A-B)Phase diagram of 1A\_Lyt\_Lys corresponding to the parameter set that gave maximum stochastic success rate, at MoI of 1 and 2. Green and red full circles are stable fixed points, whereas empty black circle is unstable fixed point. Green stable point is where system reaches when a single phage infects a bacterium. Red stable point is where system reaches when lysogeny is established by two phages, but only one of them gets integrated into the host's genome.

### 381 **Why positive feedback?**

382 There can be two reasons why lysis/lysogeny switch is based upon the positive feedback: 1)  
383 biological properties of the switch, viz. a) highest switch quotient and b) presence of bistability  
384 at MoI of 1, and 2) quickest evolution of such a model. It should be noted, however, that speed  
385 of evolution would not matter if evolution is path-independent. That is, it's possible that nature  
386 initially evolves a sub-optimal design but which, given enough time, gets superseded by an  
387 optimal one.

388 1a) Switch quotient: As mentioned in the previous sections, SQs generated in the deterministic  
389 and the stochastic simulations, respectively, for models possessing the positive feedback are  
390 much greater than those of the models lacking positive feedback.

391 1b) Bistability at MoI of 1: As stated in the last section, for models not possessing the positive  
392 feedback loop, no parameter set, if at all, having sufficiently good stochastic success rate  
393 generated bistability. If one ignores the possibility of any other mechanism generating bistability,  
394 such as the formation of OL-CI-OR complex, this reason alone is sufficient for nature to choose  
395 models which possess the positive feedback loop over those which do not.

396 2) Speed of evolution: Even though the maximum stochastic success rate is very low for  
397 3\_Lyt\_Lys and (especially) 6\_Lyt\_Lys, they are still compared with 4\_Lyt\_Lys and 2\_Lyt\_Lys,  
398 respectively, as these two are the only pairs within which mathematical comparison with regard  
399 to the positive feedback loop is possible. 2\_Lyt\_Lys and 4\_Lyt\_Lys differ from 6\_Lyt\_Lys and  
400 3\_Lyt\_Lys, respectively, only in not having the positive feedback loop. Thus, model equations  
401 of former two models differ from those of latter two only in the dynamics of Lys. In models  
402 with the positive feedback loop, the term representing binding of Lys to the intergenic region  
403 (i.e.,  $Y^b/K_{D2}$ ) is multiplied by rate constant for transcriptional activation of *lys* by Lys,  $k_4$ .  
404 On the other hand, in models without the positive feedback loop  $Y^b/K_{D2}$  is multiplied by  $k_3$ ,  
405 the basal expression rate of *lys*. Thus, 2\_Lyt\_Lys and 4\_Lyt\_Lys can be thought of as being  
406 equivalent to 6\_Lyt\_Lys and 3\_Lyt\_Lys, respectively, whose  $k_4$  is equal to  $k_3$ . That is, the former  
407 two models are those latter two models, respectively, whose rate constant for transcriptional  
408 activation of *lys* by Lys is equal to the basal expression rate of *lys*. This constrain of having  
409  $k_3 = k_4$  reduces the potential parameter space for 2\_Lyt\_Lys and 4\_Lyt\_Lys by one dimension.  
410 Hence, the two parameters being independent in 3\_Lyt\_Lys and 6\_Lyt\_Lys makes nature more  
411 likely to discover them. This explains why 2\_Lyt\_Lys (11, 11) and 4\_Lyt\_Lys (2, 2) produced  
412 fewer parameter sets than 6\_Lyt\_Lys (16, 16) and 3\_Lyt\_Lys (11, 13), respectively, for both sets  
413 of Hill coefficients during the order search (as shown in the parenthesis).

414 Now, qualitative equivalence of 3\_Lyt\_Lys and 6\_Lyt\_Lys with 1B\_Lyt\_Lys, which is equivalent  
415 to 1A\_Lyt\_Lys, is shown. 1B\_Lyt\_Lys is qualitatively equivalent to 3\_Lyt\_Lys for the reason that  
416 in the former, transcriptional activation of *lys'* is achieved by binding of Lyt to its promoter;  
417 whereas, in the latter, *lys* possesses basal expression. 6\_Lyt\_Lys differs from 3\_Lyt\_Lys in  
418 having Lyt as a repressor of *lys*. This interaction is expendable, as at MoI of 2 concentration  
419 of Lyt is anyway very low, and, qualitatively speaking, at MoI of 1 repression of *lys* by Lyt  
420 can be compensated by reducing basal expression of *lys*. As Table 6 shows, for a given set of  
421 Hill coefficients and range of stochastic success rate, average  $k_3$  is higher (except being equal  
422 on one occasion) for 6\_Lyt\_Lys than that for 3\_Lyt\_Lys, for those cases where both models  
423 produce switch at least for one parameter set. It should be noted that the comparison is not

424 mathematical but only qualitative.

425

**Table 6:** Average and SD of  $k_3$  for various thresholds of stochastic success rate.

| Design    | AVG $k_3$          |                    | AVG $k_3$                 |                    | AVG $k_3$            |                    |
|-----------|--------------------|--------------------|---------------------------|--------------------|----------------------|--------------------|
|           | (SD)               |                    | (SD)                      |                    | (SD)                 |                    |
|           | $(SSR^a \geq 60)$  |                    | $(60 > SSR \geq 50)$      |                    | $(50 > SSR \geq 40)$ |                    |
|           | a=2, b=2           | a=2, b=4           | a=2, b=2                  | a=2, b=4           | a=2, b=2             | a=2, b=4           |
| 3_Lyt_Lys | 0.0074<br>(0.0026) | 0.0478<br>(0.0234) | 0.0037<br>(N/A)           | none               | 0.0031<br>(0.0005)   | none               |
| 6_Lyt_Lys | none               | 0.1165<br>(0.0882) | 0.0037<br>( $\approx 0$ ) | 6.9641<br>(9.2816) | 0.0711<br>(0.0678)   | 4.5459<br>(4.2041) |

<sup>a</sup> SSR = Stochastic Success Rate

## 426 Methods

### 427 Derivation of model equations

428 The model, using the fact that binding of protein to itself or DNA is a much quicker process than  
 429 transcription and translation, assumes quick equilibration for the processes of protein binding  
 430 to itself or DNA, in order to calculate the "combined" dissociation constants of proteins. In the  
 431 expressions below, P, X, and Y are promoter, Lys, and Lyt, respectively.

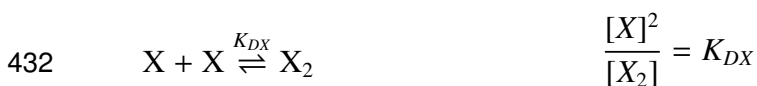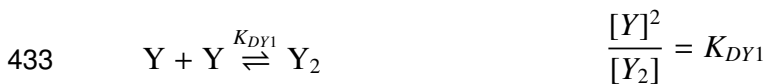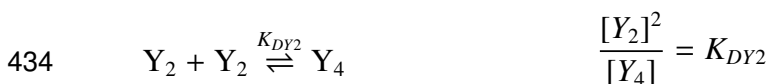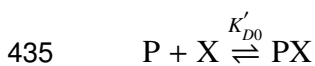

$$\frac{[P][X]}{[PX]} = K'_{D0} = K_{D0}$$

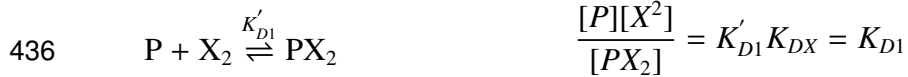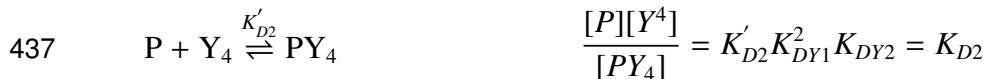

438 Above expressions for concentrations of promoter-protein complexes are for cases where a) Lyt  
 439 binds as monomer, b) Lyt binds as dimer, and c) Lys binds as tetramer. They exhaust all other  
 440 cases, viz. monomeric and dimeric Lys, and monomeric and dimeric CII.

441 Processes of transcription and translation are not considered explicitly except for *lyt-CII*  
 442 genes in the three-protein models. Hence, the model equations describe concentrations of  
 443 proteins only. With expressions for concentrations of promoter-protein complexes, one can  
 444 write generalized form of term representing protein production.

445 
$$b + \sum_i k_i \cdot [DNA - Prot_i]$$
  
 446 
$$\frac{\quad}{[Unbound DNA] + \sum_i k_i \cdot [DNA - Prot_i]}$$

447 where b is, in case present, basal expression and  $k_i$  is rate constant for transcriptional activation  
 448 by  $i_{th}$  protein.

449 Parameter sets, viz. rate constants and dissociation constants, of model equations were  
 450 searched deterministically in two stages, viz. order search and linear search (as they are named  
 451 here). In the order search, rate constants and dissociation constants were searched as 3's  
 452 exponent, which was varied between -5 and 5 with the difference of 1, in a nested fashion.  
 453 Thus, the number of parameter sets searched was equal to the number of parameters raised  
 454 to the power 11. Notably, switch quotients generated by this approach are unrefined because  
 455 rate constants and dissociation constants were increased geometrically, thereby causing a lot  
 456 of intervening values to remain unsampled. Therefore, parameter sets generated from order

457 search were further refined by linear search, which searches the neighbourhood of parameter  
458 set arithmetically. It was noted that those parameter sets generated in the order search whose  
459 SQs were too close to each other were either rescaled form of each other, or differed in  
460 those parameters to which SQ was resilient up to a certain range. Thus, in order to remove  
461 redundancy and in the interest of time, for linear search, the parameter sets were taken in such  
462 a way that the difference between consecutive SQs is at least 0.01.

463 Parameter sets, and thus accompanied SQs, generated through order search were refined  
464 by linear search in the following way. The value of each parameter (say,  $V$ ) of a set was  
465 varied between  $-3*V/5$  and  $3*V/5$  with the increment of  $V/5$ , in a nested fashion. Thus, the  
466 number of parameter sets searched was equal to the number of parameters raised to the power  
467 7. However, for three-protein model, which had eight parameters, in the interest of saving time,  
468 each parameter was varied between  $-2*V/5$  and  $2*V/5$  with the increment of  $V/5$ , in a nested  
469 fashion. Search was ended if the latest SQ was either lower than the previous one (which never  
470 happened) or if  $((\text{latest SQ} - \text{previous SQ})/\text{previous SQ})$  was less than 0.01. Again, in the  
471 interest of saving time, for three-protein model, the search was ended if the SQ at the end of  
472 the last iteration was more than or equal to 0.95. It should be noted that linear search is path  
473 dependent: it may happen that a path which initially yields lower SQs leads to higher SQ in  
474 the end than a path which initially yields higher SQs, and thus, treaded by the search. For both  
475 order and linear search and for all of the models, in order to expedite search, those parameter  
476 sets were rejected whose accompanying SQ was lower than the SQ of the previous parameter  
477 set. The values of the parameters were normalized such that the Lyt's equilibrium concentration  
478 was 10 arb. units. This was done for two purposes: a) to ensure that lowest values of Lyt at  
479 MoI of 1 and Lys at MoI of 2 never drop to zero in the stochastic simulations; b) in order to  
480 make comparison of parameter sets and equilibrium values of proteins visually easier. For both  
481 order and linear search, simulations were carried for time 100 arb. units. Thus, there was a  
482 possibility of a system of equations, defining a particular model, not reaching equilibrium in  
483 100 arb. units for a given parameter set. In order to eliminate such parameter sets, simulations  
484 were done for  $10^5$  arb. units. Only few parameter sets had not reached equilibrium, and all

485 of such parameter sets produced negative SQ. In order to calculate stochastic switch quotie nt,  
486 levels of proteins were averaged between 100 and 200 arb. units. The transient kinetics, viz.  
487 inital rise and plateauing at MoI of 1 and bell-shaped trajectory MoI 2, were completed at most  
488 by 50 arb. units.

## 489 **References**

- 490 [1] Kourilsky P Lysogenization by bacteriophage lambda. I. Multiple infection and the  
491 lysogenic response. *Mol Gen Genet.* 1973; 122: 183–195.
- 492 [2] Kobiler O, Rokney A, Friedman N, Court DL, Stavans J, Oppenheim AB Quantitative  
493 kinetic analysis of the bacteriophage lambda genetic network. *Proc Natl Acad Sci U S*  
494 *A.* 2005; 102: 4470–4475.
- 495 [3] Avlund M, Dodd IB, Semsey S, Sneppen K, Krishna S Why do phage play dice? *J Virol.*  
496 2009; 83: 11416–11420.
- 497 [4] Kourilsky P Lysogenization by bacteriophage lambda. II. Identification of genes  
498 involved in the multiplicity dependent processes. *Biochimie.* 1974; 56: 1517–1523.
- 499 [5] Banuett F, Hoyt MA, McFarlane L, Echols H, Herskowitz I hflB, a new *Escherichia coli*  
500 locus regulating lysogeny and the level of bacteriophage lambda cII protein. *J Mol Biol.*  
501 1986; 187: 213–224.
- 502 [6] Kobiler O, Rokney A, Oppenheim AB Phage lambda CIII: a protease inhibitor regulating  
503 the lysis-lysogeny decision. *PLoS One.* 2007; 2:e363.
- 504 [7] Weitz JS, Mileyko Y, Joh RI, Voit EO Collective decision making in bacterial viruses.  
505 *Biophys J.* 2008; 95: 2673–2680.
- 506 [8] Court DL, Oppenheim AB, Adhya SL A new look at bacteriophage lambda genetic  
507 networks. *J Bacteriol.* 2007; 189: 298–304.

- 508 [9] Avlund M, Krishna S, Semsey S, Dodd IB, Sneppen K. Minimal gene regulatory circuits  
509 for a lysis-lysogeny choice in the presence of noise. *PLoS One*. 2010; 5:e15037.
- 510 [10] Hoopes BC, McClure WR A cII-dependent promoter is located within the Q gene of  
511 bacteriophage lambda. *Proc Natl Acad Sci U S A*. 1985; 82: 3134–3138.
- 512 [11] Ho YS, Rosenberg M Characterization of a third, cII-dependent, coordinately activated  
513 promoter on phage lambda involved in lysogenic development. *J Biol Chem*. 1985; 260:  
514 11838–11844.
- 515 [12] Svenningsen SL, Costantino N, Court DL, Adhya S On the role of Cro in lambda  
516 prophage induction. *Proc Natl Acad Sci U S A*. 2005; 102: 4465–4469.
- 517 [13] Révet B, von Wilcken-Bergmann B, Bessert H, Barker A, Mller-Hill B Four dimers of  
518 lambda repressor bound to two suitably spaced pairs of lambda operators form octamers  
519 and DNA loops over large distances. *Current Biology*. 1999; 9: 151–154.
- 520 [14] Ho Y, Lewis M, Rosenberg M Purification and properties of a transcriptional activator.  
521 The cII protein of phage lambda. *J Biol Chem*. 1982; 257: 9128–9134.
- 522 [15] Jain D, Kim Y, Maxwell KL, Beasley S, Zhang R, Gussin GN, Edwards AM, Darst SA  
523 Crystal structure of bacteriophage lambda cII and its DNA complex. *Molecular Cell*.  
524 2005; 19: 259–269.
- 525 [16] Cui L, Murchland I, Shearwin KE, Dodd IB Enhancer-like long-range transcriptional  
526 activation by CI-mediated DNA looping. *Proc Natl Acad Sci U S A*. 2013; 110:  
527 2922–2927.
- 528 [17] Elowitz MB, Levine AJ, Siggia ED, Swain PS Stochastic gene expression in a single  
529 cell. *Science*. 2002; 297: 1183–1186.
- 530 [18] Golding I, Paulsson J, Zawilski SM, Cox EC Real-time kinetics of gene activity in  
531 individual bacteria. *Cell*. 2005; 123: 1025–1036.

- 532 [19] Gillespie DT Exact stochastic simulation of coupled chemical reactions. *J Phys Chem.*  
533 1977; 81: 2340–2361.
- 534 [20] Little JW, Mount DW The SOS regulatory system of *Escherichia coli*. *Cell.* 1982; 29:  
535 11–22.
